# Supplementary material
Source: PubMed Central journal article supplement (PMC2546566)
Supplement: NIHMS61746-supplement-_si.pdf [file NIHMS61746-supplement-_si.pdf]

The original version published December 20, 2006, contained errors.

The corrected version was published April 6, 2007.

## SUPPORTING INFORMATION

### Catalytic Enantioselective Hetero-Diels-Alder Reaction of an Azo Compound

Masanori Kawasaki, Hisashi Yamamoto\*

#### General Methods

All non aqueous reactions were carried out in flame-dried glassware under argon atmosphere unless otherwise noted. Except as otherwise indicated, all reactions were magnetically stirred and monitored by analytical thin-layer chromatography using Whatman pre-coated silica gel flexible plates (0.25 mm) with F<sub>254</sub> indicator. Visualization was accomplished by UV light (256 nm), potassium permanganate, phosphomolybdic acid, ninhydrin, and iodine. Flash column chromatography was performed using silica gel 60 (mesh 230-400) supplied by E. Merck. Yields refer to chromatographically and spectrographically pure compounds, unless otherwise noted. Commercial grade reagents and solvents were used without further purification. Propionitrile was dried over activated molecular sieves 4A before use.

Infrared spectra were recorded as thin films on sodium chloride plates using a Nicolet 20 SXB FTIR. <sup>1</sup>H NMR and <sup>13</sup>C NMR spectra were recorded on a Bruker Avance 500 (500 MHz <sup>1</sup>H, 125 MHz <sup>13</sup>C). Chemical shift values are reported in ppm relative to TMS ( $\delta$  0.0 ppm). High performance liquid chromatography (HPLC) was performed on Varian ProStar Series equipped with a variable wavelength detector using a Chiralcel OD-H column (0.46 cm x 25 cm) from Daicel. Racemic sample of adducts for HPLC were prepared in the reaction of azopyridine and siloxydienes without catalyst. Optical rotation were measured on a JASCO DIP-1000 polarimeter. Mass spectra were obtained on QSTAR (Applied SCIEX Biochemistry/MDS) spectrometers. X-ray crystallographic data was collected using SMART APEX CCD (BRUKER AXS) based diffraction meter equipped with a low-temperature apparatus.

#### Preparation of azopyridine

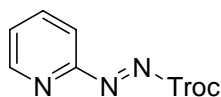

To a solution of 2-hydrazinopyridine (5.00 g, 45.9 mmol) in CH<sub>2</sub>Cl<sub>2</sub> (230 mL) was added NEt<sub>3</sub> (7.02 mL, 50.5 mmol) and TrocCl (6.17 mL, 45.9 mmol) at 0 °C. The reaction mixture was stirred at 0 °C under argon for 1 h, quenched with sat. NaHCO<sub>3</sub>, and extracted with ethyl acetate (x3). The combined organic layers were washed with brine, dried over anhydrous MgSO<sub>4</sub>, filtered, and concentrated under reduced pressure. To a solution of residue in CH<sub>2</sub>Cl<sub>2</sub> (230 mL) was added Pb(OAc)<sub>4</sub> (22.4g, 50.5 mmol) at 0 °C. The reaction mixture was stirred at 0 °C under

argon for 0.5 h. The reaction mixture was diluted with hexane, filtered through short pad of silica gel (elution with hexane/EtOAc = 7:1), and concentrated under reduced pressure. The residue was crystallized from hexane and Et<sub>2</sub>O at -78 °C to give azopyridine **1** (6.8 g, 53%, 2 steps) as orange solids: FTIR (neat) 3055, 3009, 2960, 1774, 1583, 1516, 1433, 1276, 1219, 1184 cm<sup>-1</sup>; <sup>1</sup>H NMR (500 MHz, CDCl<sub>3</sub>) δ 8.79 (d, *J* = 4.4 Hz, 1H), 8.01 (td, *J* = 7.8, 1.7 Hz, 1H), 7.95-7.97 (m, 1H), 7.55-7.56 (m, 1H), 5.08 (s, 2H); <sup>13</sup>C NMR (125 MHz, CDCl<sub>3</sub>) δ 161.2, 160.8, 150.0, 138.8, 127.8, 119.2, 93.7; LRMS (CI) *m/z* (M+H)<sup>+</sup> calcd for [C<sub>8</sub>H<sub>6</sub>Cl<sub>3</sub>N<sub>3</sub>O<sub>2</sub>+H]<sup>+</sup> 282.0, found 282.0.

### General procedure of azo hetero-Diels-Alder reaction

To a Schrenk tube was added AgOTf (6.4 mg, 25 μmol) and (*R*)-BINAP (7.8 mg, 12.5 μmol). The mixture was dried under vacuum for 10 min, anhydrous EtCN (1.5 mL), and stirred for 0.5 h. The clear solution was then cooled to -78 °C and **1** (70 mg, 0.25 mmol) dissolved in anhydrous EtCN (1 mL) was added dropwise. The resulting dark brown solution was stirred for 5 min. To a resulting mixture was added diene (0.5 mmol) dropwise. The reaction mixture was gradually warmed to -40 °C in 3 h and was stirred at -40 °C for additional 1 h. The reaction mixture was diluted with hexane, filtered through short pad of silica gel (elution with hexane/ethyl acetate = 10 : 1), and concentrated under reduced pressure. The residue was purified by flash column chromatography on silica gel to give azo hetero-Diels-Alder adduct.

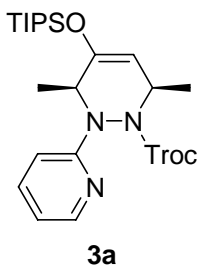

According to a general procedure, the residue was purified by flash column chromatography on silica gel (elution with hexane/ethyl acetate = 10 : 1) to give **3a** (116 mg, 87% yield, >99% ee) as colorless oil: [α]<sub>D</sub><sup>27</sup> -13.6 (*c* 1.40, CHCl<sub>3</sub>); FTIR (neat) 2945, 2892, 2867, 1731, 1664, 1594, 1471, 1434, 1399, 1299, 1218, 1154 cm<sup>-1</sup>; <sup>1</sup>H NMR (500 MHz, CDCl<sub>3</sub>) Broad signals were observed due to a mixture of rotamers. See attached <sup>1</sup>H NMR chart; <sup>13</sup>C NMR (125 MHz, CDCl<sub>3</sub>) δ 158.4, 155.0, 152.9, 148.0, 146.5, 137.7, 136.9, 115.5, 112.1, 107.7, 103.3, 95.3, 75.6, 75.0, 53.6, 50.2, 22.0, 17.9, 17.7, 17.0, 12.7, 12.5, 12.3; LRMS (CI) *m/z* (M+H)<sup>+</sup> calcd for [C<sub>23</sub>H<sub>36</sub>N<sub>3</sub>O<sub>3</sub>Cl<sub>3</sub>Si+H]<sup>+</sup> 536.1, found 536.1. Enantiomeric excess was determined by HPLC analysis with Chiralcel OD-H column (flow rate: 0.8 mL/min, hexane/2-Propanol = 99.8/0.2, major enantiomer *t<sub>r</sub>* = 46.5 min, minor enantiomer *t<sub>r</sub>* = 34.3 min).

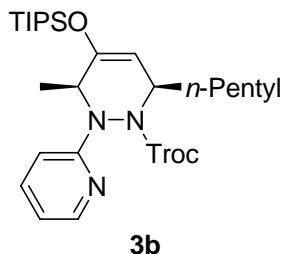

According to a general procedure, the residue was purified by flash column chromatography on silica gel (elution with hexane/ethyl acetate = 10 : 1) to give **3b** (124 mg, 84% yield, 95% ee) as colorless oil:  $[\alpha]_D^{29} -21.9$  (*c* 1.00, CHCl<sub>3</sub>); FTIR (neat) 2945, 2867, 1730, 1665, 1594, 1568, 1472, 1434, 1330, 1211, 1149 cm<sup>-1</sup>; <sup>1</sup>H NMR (500 MHz, CDCl<sub>3</sub>) Broad signals were observed due to a mixture of rotamers. See attached <sup>1</sup>H NMR chart; <sup>13</sup>C NMR (125 MHz, CDCl<sub>3</sub>) δ 159.4, 158.5, 157.2, 155.1, 153.3, 152.6, 148.0, 146.6, 137.7, 136.9, 115.4, 115.3, 111.9, 107.7, 104.3, 103.7, 101.1, 95.4, 94.1, 75.7, 74.9, 55.1, 54.6, 53.6, 33.8, 32.8, 31.9, 31.7, 26.6, 24.4, 22.6, 20.0, 17.9, 17.0, 14.0, 12.5; LRMS (CI) *m/z* (M+H)<sup>+</sup> calcd for [C<sub>27</sub>H<sub>44</sub>N<sub>3</sub>O<sub>3</sub>Cl<sub>3</sub>Si+H]<sup>+</sup> 592.2, found 592.2. Enantiomeric excess was determined by HPLC analysis with Chiralcel OD-H column (flow rate: 0.7 mL/min, hexane/2-Propanol = 99.8/0.2, major enantiomer *t<sub>r</sub>* = 38.2 min, minor enantiomer *t<sub>r</sub>* = 23.3 min).

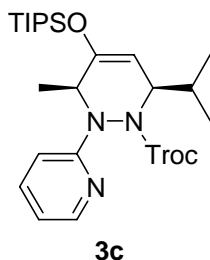

According to a general procedure, the residue was purified by flash column chromatography on silica gel (elution with hexane/ethyl acetate = 10 : 1) to give **3c** (91 mg, 65% yield, 84% ee) as colorless oil:  $[\alpha]_D^{27} -23.8$  (*c* 1.11, CHCl<sub>3</sub>); FTIR (neat) 2946, 2868, 1733, 1668, 1593, 1472, 1435, 1239, 1205 cm<sup>-1</sup>; <sup>1</sup>H NMR (500 MHz, CDCl<sub>3</sub>) Broad signals were observed due to a mixture of rotamers. See attached <sup>1</sup>H NMR chart; <sup>13</sup>C NMR (125 MHz, CDCl<sub>3</sub>) δ 159.3, 158.4, 157.7, 155.3, 154.5, 152.5, 148.0, 146.7, 137.7, 136.9, 115.3, 111.6, 107.5, 103.0, 102.2, 96.0, 94.1, 75.8, 74.8, 61.8, 60.2, 55.0, 54.0, 53.3, 31.2, 27.9, 21.3, 20.2, 20.0, 19.6, 18.0, 17.9, 17.2, 16.4, 12.8, 12.7, 12.6, 12.4, 12.3; LRMS (CI) *m/z* (M+H)<sup>+</sup> calcd for [C<sub>25</sub>H<sub>40</sub>N<sub>3</sub>O<sub>3</sub>Cl<sub>3</sub>Si+H]<sup>+</sup> 564.2, found 564.1. Enantiomeric excess was determined by HPLC analysis with Chiralcel OD-H column (flow rate: 0.5 mL/min, hexane/2-Propanol = 99.8/0.2, major enantiomer *t<sub>r</sub>* = 33.7 min, minor enantiomer *t<sub>r</sub>* = 20.9 min).

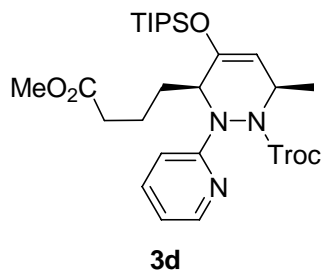

According to a general procedure, the residue was purified by flash column chromatography on silica gel (elution with hexane/ethyl acetate = 10 : 1) to give **3d** (114 mg, 74% yield, 98% ee) as colorless oil:  $[\alpha]_D^{26}$  -29.5 (*c* 0.90, CHCl<sub>3</sub>); FTIR (neat) 2947, 2867, 1735, 1665, 1594, 1472, 1435, 1296, 1214, 1134 cm<sup>-1</sup>; <sup>1</sup>H NMR (500 MHz, CDCl<sub>3</sub>) Broad signals were observed due to a mixture of rotamers. See attached <sup>1</sup>H NMR chart; <sup>13</sup>C NMR (125 MHz, CDCl<sub>3</sub>) δ 173.7, 159.3, 158.3, 157.2, 155.1, 153.7, 153.0, 148.0, 146.7, 137.8, 137.0, 115.6, 111.9, 107.7, 103.8, 103.2, 100.8, 95.3, 94.0, 75.8, 74.9, 55.1, 54.8, 54.3, 53.6, 51.6, 51.5, 34.0, 33.8, 33.2, 32.3, 22.4, 20.2, 20.1, 17.9, 17.1, 12.5; LRMS (CI) *m/z* (M+H)<sup>+</sup> calcd for [C<sub>27</sub>H<sub>42</sub>N<sub>3</sub>O<sub>5</sub>Cl<sub>3</sub>Si+H]<sup>+</sup> 622.2, found 622.1. Enantiomeric excess was determined by HPLC analysis with Chiralcel OD-H column (flow rate: 0.5 mL/min, hexane/2-Propanol = 97/3, major enantiomer *t<sub>r</sub>* = 8.8 min, minor enantiomer *t<sub>r</sub>* = 23.3 min).

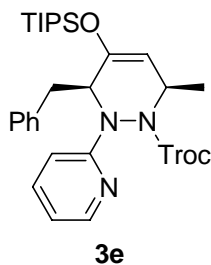

According to a general procedure, the residue was purified by flash column chromatography on silica gel (elution with hexane/ethyl acetate = 10 : 1) to give **3e** (113 mg, 74% yield, 92% ee) as colorless oil:  $[\alpha]_D^{30}$  -0.95 (*c* 0.46, CHCl<sub>3</sub>); FTIR (neat) 2945, 1730, 1666, 1592, 1470, 1433, 1391, 1287, 1210, 1149 cm<sup>-1</sup>; <sup>1</sup>H NMR (500 MHz, CDCl<sub>3</sub>) Broad signals were observed due to a mixture of rotamers. See attached <sup>1</sup>H NMR chart; <sup>13</sup>C NMR (125 MHz, CDCl<sub>3</sub>) δ 159.8, 159.1, 155.9, 150.2, 147.7, 146.6, 139.9, 137.5, 137.2, 130.7, 129.2, 128.3, 127.2, 126.1, 126.0, 116.2, 115.9, 112.8, 109.2, 104.5, 95.0, 75.8, 75.5, 62.8, 50.4, 50.3, 36.9, 33.8, 22.6, 18.1, 18.0, 17.93, 17.89, 12.7, 12.6, 12.5, 12.2; LRMS (CI) *m/z* (M+H)<sup>+</sup> calcd for [C<sub>29</sub>H<sub>40</sub>N<sub>3</sub>O<sub>3</sub>Cl<sub>3</sub>Si+H]<sup>+</sup> 612.2, found 612.1. Enantiomeric excess was determined by HPLC analysis with Chiralcel OD-H column (flow rate: 0.5 mL/min, hexane/2-Propanol = 99/1, major enantiomer *t<sub>r</sub>* = 10.6 min, minor enantiomer *t<sub>r</sub>* = 8.2 min).

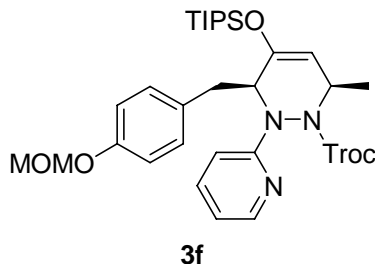

According to a general procedure, the residue was purified by flash column chromatography on silica gel (elution with hexane/ethyl acetate = 10 : 1) to give **3f** (143 mg, 85% yield, 90% ee) as colorless oil:  $[\alpha]_D^{30}$  7.83 (*c* 0.60, CH<sub>3</sub>OH); FTIR (neat) 2946, 2893, 2867, 1730, 1667, 1591, 1512, 1470, 1433, 1393, 1289, 1257, 1210, 1152 cm<sup>-1</sup>; <sup>1</sup>H NMR (500 MHz, CDCl<sub>3</sub>) Broad signals were observed due to a mixture of rotamers. See attached <sup>1</sup>H NMR chart; <sup>13</sup>C NMR (125 MHz, CDCl<sub>3</sub>) δ 159.7, 159.1, 155.9, 155.7, 155.6, 150.3, 148.3, 147.7, 146.5, 137.5, 137.2, 133.4, 131.6, 130.8, 130.6, 130.2, 129.7, 116.2, 116.1, 116.1, 115.8, 115.2, 112.7, 110.1, 109.2, 104.5, 95.0, 94.54, 94.47, 75.7, 75.5, 62.9, 60.3, 55.9, 55.8, 55.7, 50.4, 50.3, 36.0, 33.0, 22.6, 18.0, 17.91, 17.88, 17.2, 12.6, 12.4, 12.2; LRMS (CI) *m/z* (M+H)<sup>+</sup> calcd for [C<sub>31</sub>H<sub>44</sub>N<sub>3</sub>O<sub>5</sub>Cl<sub>3</sub>Si+H]<sup>+</sup> 672.2, found 672.1. Enantiomeric excess was determined by HPLC analysis with Chiralcel OD-H column (flow rate: 0.5 mL/min, hexane/2-Propanol = 99.5/0.5, major enantiomer *t<sub>r</sub>* = 15.3 min, minor enantiomer *t<sub>r</sub>* = 12.6 min).

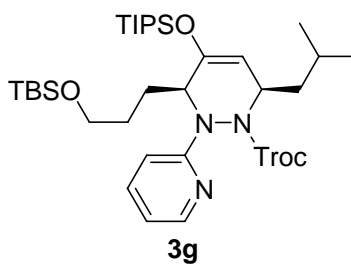

According to a general procedure, the residue was purified by flash column chromatography on silica gel (elution with hexane/ethyl acetate = 10 : 1) to give **3g** (150 mg, 82% yield, 95% ee) as colorless oil:  $[\alpha]_D^{29}$  -18.0 (*c* 1.10, CHCl<sub>3</sub>); FTIR (neat) 2954, 2867, 1730, 1667, 1593, 1470, 1434, 1388, 1255, 1210, 1149, 1100 cm<sup>-1</sup>; <sup>1</sup>H NMR (500 MHz, CDCl<sub>3</sub>) Broad signals were observed due to a mixture of rotamers. See attached <sup>1</sup>H NMR chart; <sup>13</sup>C NMR (125 MHz, CDCl<sub>3</sub>) δ 159.61, 159.55, 157.1, 155.4, 152.1, 149.9, 147.9, 146.6, 137.6, 137.0, 115.8, 112.2, 108.5, 106.0, 101.0, 95.2, 94.2, 75.7, 75.1, 63.7, 63.0, 62.9, 60.0, 58.8, 53.4, 53.1, 44.1, 42.2, 41.7, 29.8, 27.6, 26.7, 25.93, 25.90, 25.7, 25.4, 25.3, 23.9, 22.9, 22.7, 21.7, 18.3, 18.2, 18.0, 17.9, 17.87, 12.6, 12.5, -5.3; LRMS (CI) *m/z* (M+H)<sup>+</sup> calcd for [C<sub>34</sub>H<sub>60</sub>N<sub>3</sub>O<sub>4</sub>Cl<sub>3</sub>Si+H]<sup>+</sup> 736.3, found 736.2. Enantiomeric excess was determined by HPLC analysis with Chiralcel OD-H column (flow rate: 0.8 mL/min, hexane/2-Propanol = 99.8/0.2, major enantiomer *t<sub>r</sub>* = 6.0 min, minor enantiomer *t<sub>r</sub>* = 5.1 min).

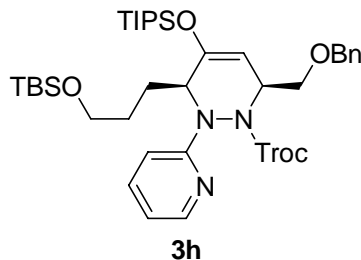

According to a general procedure, the residue was purified by flash column chromatography on silica gel (elution with hexane/ethyl acetate = 10 : 1) to give **3h** (168 mg, 84% yield, 98% ee) as colorless oil:  $[\alpha]_D^{30}$  -13.9 (*c* 0.88, CHCl<sub>3</sub>); FTIR (neat) 2947, 2866, 1729, 1672, 1592, 1470, 1434, 1400, 1288, 1250, 1211, 1144, 1100 cm<sup>-1</sup>; <sup>1</sup>H NMR (500 MHz, CDCl<sub>3</sub>) Broad signals were observed due to a mixture of rotamers. See attached <sup>1</sup>H NMR chart; <sup>13</sup>C NMR (125 MHz, CDCl<sub>3</sub>) δ 159.6, 159.2, 155.5, 152.6, 147.9, 146.3, 138.5, 138.0, 137.6, 137.1, 128.4, 128.2, 127.8, 127.5, 127.4, 115.9, 108.4, 99.5, 95.1, 75.7, 75.2, 73.3, 72.9, 71.8, 69.7, 63.6, 63.1, 59.6, 58.9, 54.4, 53.9, 29.9, 27.7, 26.5, 26.0, 24.9, 18.3, 17.9, 17.88, 12.6, 12.4, -5.3, -5.33; LRMS (CI) *m/z* (M+H)<sup>+</sup> calcd for [C<sub>38</sub>H<sub>60</sub>N<sub>3</sub>O<sub>5</sub>Cl<sub>3</sub>Si<sub>2</sub>+H]<sup>+</sup> 800.3, found 800.2. Enantiomeric excess was determined by HPLC analysis with Chiralcel OD-H column (flow rate: 1 mL/min, hexane/2-Propanol = 98/2, major enantiomer *t<sub>r</sub>* = 42.2 min, minor enantiomer *t<sub>r</sub>* = 12.9 min) after deprotection of TIPS and TBS groups with TFA in CH<sub>2</sub>Cl<sub>2</sub>.

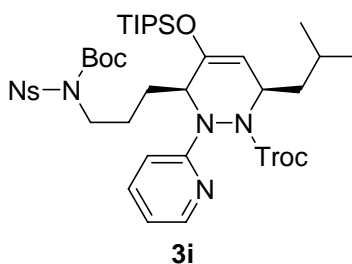

According to a general procedure, the residue was purified by flash column chromatography on silica gel (elution with hexane/ethyl acetate = 10 : 1) to give **3i** (175 mg, 77% yield, 98% ee) as colorless oil:  $[\alpha]_D^{27}$  -10.1 (*c* 0.78, CHCl<sub>3</sub>); FTIR (neat) 2956, 2868, 1733, 1684, 1593, 1544, 1471, 1434, 1369, 1300, 1257, 1212, 1154, 1122 cm<sup>-1</sup>; <sup>1</sup>H NMR (500 MHz, CDCl<sub>3</sub>) Broad signals were observed due to a mixture of rotamers. See attached <sup>1</sup>H NMR chart; <sup>13</sup>C NMR (125 MHz, CDCl<sub>3</sub>) δ 159.5, 159.4, 157.2, 155.3, 151.7, 150.3, 149.8, 147.8, 147.6, 147.5, 146.8, 137.6, 137.1, 134.0, 133.8, 133.7, 133.3, 133.1, 131.62, 131.56, 124.2, 124.1, 116.0, 115.8, 111.9, 108.9, 106.1, 101.2, 95.3, 84.7, 84.1, 75.7, 74.9, 59.8, 58.8, 53.4, 53.1, 48.3, 48.1, 44.1, 42.4, 42.2, 28.2, 27.8, 27.7, 27.5, 26.5, 25.8, 25.5, 24.7, 24.4, 23.9, 22.9, 22.7, 21.7, 18.0, 17.98, 17.9, 17.88, 12.6, 12.5; LRMS (CI) *m/z* (M+H)<sup>+</sup> calcd for [C<sub>39</sub>H<sub>58</sub>N<sub>5</sub>O<sub>9</sub>Cl<sub>3</sub>Si+H]<sup>+</sup> 906.3, found 906.2. Enantiomeric excess was determined by HPLC analysis with Chiralcel OD-H column (flow rate: 0.8 mL/min, hexane/2-Propanol = 99.8/0.2, major enantiomer *t<sub>r</sub>* = 11.2 min, minor enantiomer *t<sub>r</sub>* = 10.3 min).

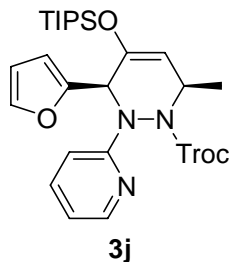

According to a general procedure, the residue was purified by flash column chromatography on silica gel (elution with hexane/ethyl acetate = 10 : 1) to give **3j** (114 mg, 78% yield, 92% ee) as colorless oil:  $[\alpha]_D^{27} -54.4$  (*c* 0.85, CHCl<sub>3</sub>); FTIR (neat) 2945, 2867, 1734, 1663, 1593, 1568, 1473, 1435, 1386, 1331, 1297, 1273, 1213, 1136 cm<sup>-1</sup>; <sup>1</sup>H NMR (500 MHz, CDCl<sub>3</sub>) Broad signals were observed due to a mixture of rotamers. See attached <sup>1</sup>H NMR chart; <sup>13</sup>C NMR (125 MHz, CDCl<sub>3</sub>) δ 159.0, 158.4, 156.5, 155.1, 154.5, 153.8, 152.6, 152.1, 148.1, 146.2, 142.8, 141.5, 138.0, 137.0, 116.0, 115.6, 112.6, 110.7, 110.6, 110.4, 108.0, 107.1, 99.9, 98.7, 95.2, 94.1, 75.6, 75.0, 55.0, 54.1, 52.1, 51.5, 30.3, 19.1, 17.9, 17.8, 12.54, 12.46; LRMS (CI) *m/z* (M+H)<sup>+</sup> calcd for [C<sub>26</sub>H<sub>36</sub>N<sub>3</sub>O<sub>4</sub>Cl<sub>3</sub>Si+H]<sup>+</sup> 588.2, found 588.0. Enantiomeric excess was determined by HPLC analysis with Chiralcel OD-H column (flow rate: 1 mL/min, hexane/2-Propanol = 99.8/0.2, major enantiomer *t<sub>r</sub>* = 11.2 min, minor enantiomer *t<sub>r</sub>* = 14.6 min).

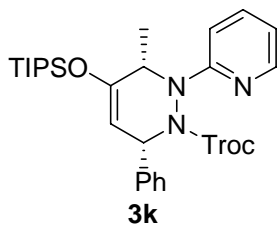

According to a general procedure, the residue was purified by flash column chromatography on silica gel (elution with hexane/ethyl acetate = 10 : 1) to give **3k** (104 mg, 70% yield, 55% ee) as colorless oil:  $[\alpha]_D^{25} -21.9$  (*c* 0.9, CHCl<sub>3</sub>); FTIR (neat) 2945, 2867, 1736, 1662, 1593, 1471, 1434, 1260, 1218, 1136 cm<sup>-1</sup>; <sup>1</sup>H NMR (500 MHz, CDCl<sub>3</sub>) Broad signals were observed due to a mixture of rotamers. See attached <sup>1</sup>H NMR chart; <sup>13</sup>C NMR (125 MHz, CDCl<sub>3</sub>) δ 158.9, 158.6, 155.1, 151.7, 148.1, 146.2, 141.1, 137.9, 136.8, 129.1, 128.3, 128.0, 127.3, 116.1, 115.7, 112.3, 108.2, 102.4, 101.5, 95.2, 75.8, 75.0, 58.5, 57.8, 55.2, 54.3, 18.0, 17.8, 17.77, 12.6, 12.4; LRMS (CI) *m/z* (M+H)<sup>+</sup> calcd for [C<sub>28</sub>H<sub>38</sub>N<sub>3</sub>O<sub>3</sub>Cl<sub>3</sub>Si+H]<sup>+</sup> 598.2, found 598.1. Enantiomeric excess was determined by HPLC analysis with Chiralcel OD-H column (flow rate: 1 mL/min, hexane/2-Propanol = 99.8/0.2, major enantiomer *t<sub>r</sub>* = 9.8 min, minor enantiomer *t<sub>r</sub>* = 19.0 min).

## Cleavage of N-N bond

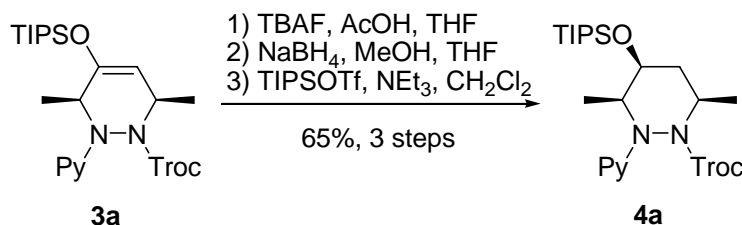

To a solution of **3a** (4.56 g, 8.54 mmol) in THF (43 mL) was added AcOH (2.93 mL, 51.2 mmol) and TBAF (1M solution in THF, 17.1 mL, 17.1 mmol) at 0 °C. The reaction mixture was stirred at 0 °C under argon for 2 h, quenched with sat. NaHCO<sub>3</sub>, and extracted with ethyl acetate (x2). The combined organic layers were washed with brine, dried over anhydrous MgSO<sub>4</sub>, filtered on silica gel, and concentrated under reduced pressure. To a solution of residue in THF/MeOH (3:1, 40 mL) was added NaBH<sub>4</sub> (487 mg, 12.8 mmol) at -78 °C. The reaction mixture was gradually warmed to -40 °C in 3 h, quenched with sat. NaHCO<sub>3</sub>, and extracted with ethyl acetate (x2). The combined organic layers were washed with brine, dried over anhydrous MgSO<sub>4</sub>, filtered on silica gel, and concentrated under reduced pressure. To a solution of residue in CH<sub>2</sub>Cl<sub>2</sub> (40 mL) was added TIPSOTf (2.3 mL, 8.54 mmol) and NEt<sub>3</sub> (1.3 mL, 9.39 mmol) at 0 °C. The reaction mixture was stirred at 0 °C under argon for 2 h, quenched with sat. NaHCO<sub>3</sub>, and extracted with ethyl acetate/hexane (1:10) (x2). The combined organic layers were washed with brine, dried over anhydrous MgSO<sub>4</sub>, filtered on silica gel, and concentrated under reduced pressure. The residue was purified by flash column chromatography on silica gel to give **4a** (2.96 g, 65%, 3 steps) as white solid:  $[\alpha]_D^{25}$  -39.1 (*c* 0.94, CHCl<sub>3</sub>); FTIR (neat) 2944, 2866, 1731, 1593, 1469, 1435, 1300, 1151, 1103 cm<sup>-1</sup>; <sup>1</sup>H NMR (500 MHz, CDCl<sub>3</sub>) δ 8.17 (dd, *J* = 4.9, 0.86 Hz, 1H), 7.48-7.52, (m, 1H), 6.68 (dd, *J* = 6.9, 5.2 Hz, 1H), 6.34 (d, *J* = 8.5 Hz, 1H), 5.26-5.32 (m, 1H), 4.52-4.58 (br m, 2H), 3.95 (td, *J* = 10.7, 5.1 Hz, 1H), 3.35-3.39 (m, 1H), 1.96 (q, *J* = 12.1 Hz, 1H), 1.67-1.70 (m, 1H), 1.67 (d, *J* = 7.0 Hz, 1H), 1.29 (d, *J* = 7.0 Hz, 1H), 1.05-1.10 (m, 21H); <sup>13</sup>C NMR (125 MHz, CDCl<sub>3</sub>) δ 157.7, 148.0, 137.9, 114.7, 107.0, 95.2, 74.9, 67.0, 54.6, 51.7, 37.6, 20.1, 18.0, 17.96, 12.2, 9.6; LRMS (CI) *m/z* (M+H)<sup>+</sup> calcd for [C<sub>23</sub>H<sub>38</sub>N<sub>3</sub>O<sub>3</sub>Cl<sub>3</sub>+H]<sup>+</sup> 538.2, found 538.0.

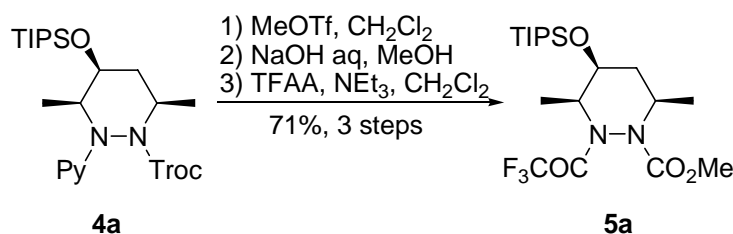

To a solution of **4a** (722 mg, 1.34 mmol) in CH<sub>2</sub>Cl<sub>2</sub> (13.4 mL) was added MeOTf (1.52 mL, 13.4 mmol) at room



temperature. The reaction mixture was stirred at room temperature under argon for 3 h, quenched with sat.  $\text{Na}_2\text{CO}_3$ , and extracted with  $\text{CH}_2\text{Cl}_2$  (x2). The combined organic layers were dried over anhydrous  $\text{MgSO}_4$ , filtered, and concentrated under reduced pressure. To a solution of residue in MeOH (13.4 mL) was added 2N NaOH aq (6.7 mL, 13.4 mmol) at room temperature. The reaction mixture was stirred at 50 °C for 3 h, diluted with water, extracted with ethyl acetate/ hexane (1:3), dried over anhydrous  $\text{MgSO}_4$ , filtered on silica gel, and concentrated under reduced pressure. To a solution of residue in  $\text{CH}_2\text{Cl}_2$  (13.4 mL) was added TFAA (227  $\mu\text{L}$ , 1.61 mmol) and  $\text{NEt}_3$  (224  $\mu\text{L}$ , 1.61 mmol) at 0 °C. The reaction mixture was stirred at 0 °C under argon for 1 h, quenched with sat.  $\text{NaHCO}_3$ , and extracted with ethyl acetate (x2). The combined organic layers were washed with brine, dried over anhydrous  $\text{MgSO}_4$ , filtered, and concentrated under reduced pressure. The residue was purified by flash column chromatography on silica gel to give **5a** (419 mg, 71%, 3 steps) as colorless oil:  $[\alpha]_D^{26}$  -16.6 (*c* 1.44,  $\text{CHCl}_3$ ); FTIR (neat) 2946, 2868, 1741, 1716, 1444, 1385, 1292, 1218, 1158, 1104, 1072  $\text{cm}^{-1}$ ;  $^1\text{H}$  NMR (500 MHz,  $\text{CDCl}_3$ )  $\delta$  4.78-4.84 (m, 1H), 3.92-3.98 (m, 1H), 3.69 (s, 3H), 3.28-3.36 (m, 1H), 1.91 (q, *J* = 12.1 Hz, 1H), 1.71-1.76 (m, 1H), 1.62 (d, *J* = 7.1 Hz, 3H), 1.14 (d, *J* = 7.0 Hz, 3H), 1.03-1.11 (m, 21H);  $^{13}\text{C}$  NMR (125 MHz,  $\text{CDCl}_3$ )  $\delta$  157.5 (q, *J* = 36.1 Hz), 156.5, 116.0 (q, *J* = 287 Hz), 68.3, 58.5, 52.9, 52.8, 35.7, 19.3, 17.9, 12.1, 9.3; LRMS (CI) *m/z* (M+H)<sup>+</sup> calcd for  $[\text{C}_{19}\text{H}_{35}\text{N}_2\text{O}_4\text{F}_3\text{Si}+\text{H}]^+$  441.2, found 441.2.

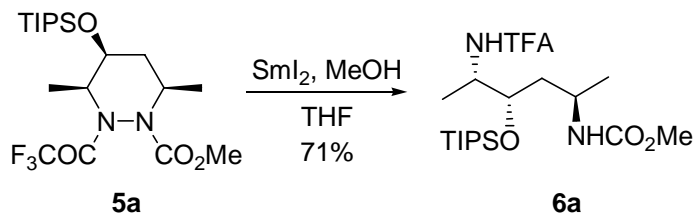

To a solution of **5a** (28 mg, 63.6  $\mu\text{mol}$ ) in MeOH (0.2 mL) was added freshly prepared  $\text{SmI}_2$  (0.1 M solution in THF, 3.2 mL, 0.32 mmol) at room temperature. The reaction mixture was stirred at room temperature under argon for 0.5 h, quenched with sat.  $\text{NaHCO}_3$ , and extracted with AcOEt (x2). The combined organic layers were washed with brine, dried over anhydrous  $\text{MgSO}_4$ , filtered, and concentrated under reduced pressure. The residue was purified by flash column chromatography on silica gel to give **6a** (20 mg, 71%) as colorless oil:  $[\alpha]_D^{25}$  -20.9 (*c* 0.99,  $\text{CHCl}_3$ ); FTIR (neat) 3420, 3323, 2946, 2869, 1716, 1533, 1462, 1359, 1259, 1211, 1165  $\text{cm}^{-1}$ ;  $^1\text{H}$  NMR (500 MHz,  $\text{CDCl}_3$ )  $\delta$  6.73-6.78 (br m, 1H), 4.95-4.80 (br m, 1H), 4.10-4.12 (br m, 1H), 3.90-3.98 (br m, 1H), 3.70-3.76 (br s, 1H), 3.66 (s, 3H), 1.53-1.75 (m, 2H), 1.28 (d, *J* = 6.8 Hz, 3H), 1.16 (d, *J* = 6.4 Hz, 3H), 1.06-1.13 (m, 21H);  $^{13}\text{C}$  NMR (125 MHz,  $\text{CDCl}_3$ )  $\delta$  157.0 (q, *J* = 36.4 Hz), 156.5, 115.9 (q, *J* = 286 Hz), 73.4, 52.0, 49.5, 45.1, 41.6, 22.3, 18.1, 18.0, 12.7; LRMS (CI) *m/z* (M+H)<sup>+</sup> calcd for  $[\text{C}_{19}\text{H}_{37}\text{N}_2\text{O}_4\text{F}_3\text{Si}+\text{H}]^+$  443.2, found 443.1.

## Determination of absolute stereochemistry

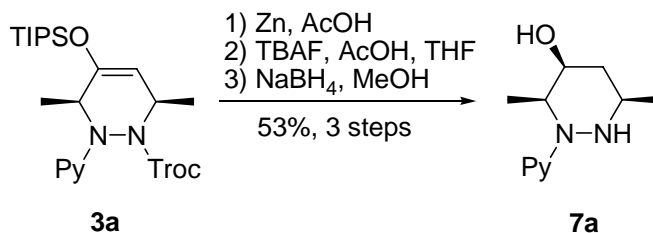

To a solution of **3a** (463 mg, 0.867 mmol) in AcOH (4.3 mL) was added Zn powder (1.13 g, 17.3 mmol) at room temperature. The reaction mixture was stirred at room temperature under argon for 1 h, quenched with sat. NaHCO<sub>3</sub>, and extracted with AcOEt (x2). The combined organic layers were washed with brine, dried over anhydrous MgSO<sub>4</sub>, filtered, and concentrated under reduced pressure. To a solution of residue in THF (4.3 mL) was added TBAF (1M solution in THF, 1.3 mL, 1.30 mmol) at 0 °C. The reaction mixture was stirred at 0 °C for 1 h, quenched with sat. NaHCO<sub>3</sub>, extracted with AcOEt, dried over anhydrous MgSO<sub>4</sub>, filtered on silica gel, and concentrated under reduced pressure. To a solution of residue in MeOH (4.3 mL) was added NaBH<sub>4</sub> (49 mg, 1.30 mmol) at 0 °C. The reaction mixture was stirred at 0 °C under argon for 0.5 h, quenched with sat. NaHCO<sub>3</sub>, and extracted with ethyl acetate (x2). The combined organic layers were washed with brine, dried over anhydrous MgSO<sub>4</sub>, filtered, and concentrated under reduced pressure. The residue was purified by flash column chromatography on silica gel to give **7a** (96 mg, 53%, 3 steps) as colorless oil: [ $\alpha$ ]<sub>D</sub><sup>26</sup> 71.4 (*c* 1.05, CHCl<sub>3</sub>); FTIR (neat) 3302, 2962, 2930, 1595, 1559, 1494, 1466, 1426, 1298, 1107, 1051 cm<sup>-1</sup>; <sup>1</sup>H NMR (500 MHz, CDCl<sub>3</sub>)  $\delta$  8.06-8.08 (m, 1H), 7.42-7.46 (m, 1H), 7.26 (d, *J* = 8.6 Hz, 1H), 6.54 (t, *J* = 6.2, 1H), 5.06 (quint, *J* = 6.7 Hz, 1H), 3.94 (dt, *J* = 11.9, 4.9 Hz, 1H), 2.89-3.30 (br s, 2H), 2.84-2.90 (m, 1H), 1.81-1.85 (m, 1H), 1.34 (q, *J* = 11.9 Hz, 1H), 1.66 (d, *J* = 6.9 Hz, 3H), 1.58 (d, *J* = 6.4 Hz, 3H); <sup>13</sup>C NMR (125 MHz, CDCl<sub>3</sub>)  $\delta$  159.7, 147.0, 137.5, 112.8, 108.7, 67.1, 51.0, 49.1, 36.9, 19.4, 7.5; LRMS (CI) *m/z* (M+H)<sup>+</sup> calcd for [C<sub>11</sub>H<sub>17</sub>N<sub>3</sub>O+H]<sup>+</sup> 208.1, found 208.1.

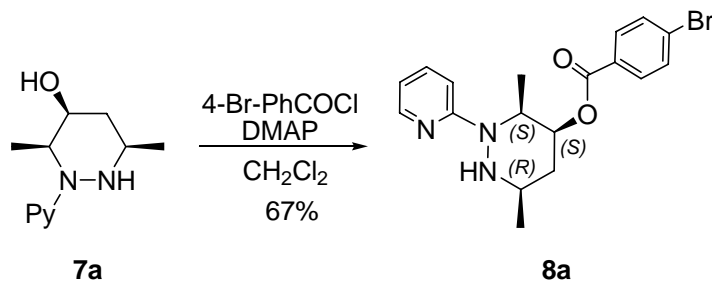

To a solution of **7a** (33 mg, 0.16 mmol) in CH<sub>2</sub>Cl<sub>2</sub> (1.6 mL) was added DMAP (58 mg, 0.48 mmol) and 4-bromobenzoyl chloride (105 mg, 0.48 mmol) at 0 °C. The reaction mixture was stirred at room temperature under

argon for 15 h, quenched with sat.  $\text{NaHCO}_3$ , and extracted with ethyl acetate (x2). The combined organic layers were washed with brine, dried over anhydrous  $\text{MgSO}_4$ , filtered, and concentrated under reduced pressure. The residue was purified by flash column chromatography on silica gel to give **8a** (41 mg, 67%) as colorless needle. The sample for X-ray crystallographic analysis was prepared by crystallization from  $\text{Et}_2\text{O}$ :  $[\alpha]_D^{28}$  110.3 (*c* 1.00,  $\text{CHCl}_3$ ); FTIR (neat) 2964, 2936, 1719, 1591, 1427, 1271  $\text{cm}^{-1}$ ;  $^1\text{H}$  NMR (500 MHz,  $\text{CDCl}_3$ )  $\delta$  8.10-8.14 (m, 1H), 7.88 (d, *J* = 8.5 Hz, 1H), 7.60 (d, *J* = 8.5 Hz, 1H), 7.45-7.50 (m, 1H), 7.25-7.27 (m, 1H), 6.58-6.61 (m, 1H), 5.29-5.35 (m, 1H), 5.23 (dt, *J* = 10.4, 5.5 Hz, 1H), 3.00-3.08 (m, 1H), 2.55-2.90 (br s, 1H), 2.04-2.09 (m, 1H), 1.52 (q, *J* = 11.9 Hz), 1.27 (d, *J* = 6.8 Hz, 1H), 1.19 (d, *J* = 6.8 Hz, 1H);  $^{13}\text{C}$  NMR (125 MHz,  $\text{CDCl}_3$ )  $\delta$  164.9, 159.2, 147.3, 137.5, 131.7, 131.0, 129.2, 128.1, 113.3, 108.6, 70.6, 50.7, 46.2, 33.9, 19.4, 8.8; LRMS (CI) *m/z* ( $\text{M}+\text{H}$ )<sup>+</sup> calcd for  $[\text{C}_{18}\text{H}_{20}\text{N}_3\text{O}_2\text{Br}+\text{H}]^+$  390.0, found 390.0.

### Synthesis of Silyloxydienes

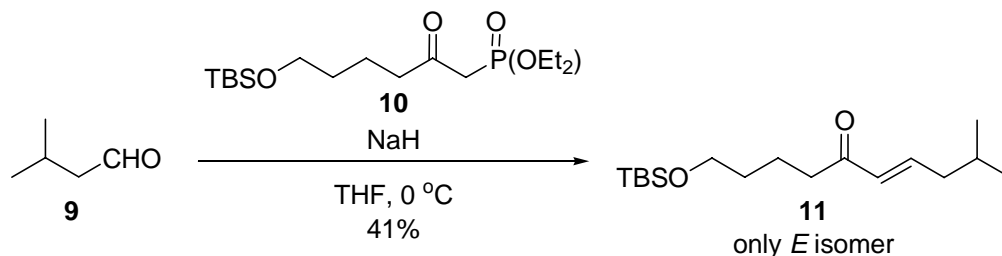

To a solution of NaH (200 mg, 5.0 mmol) in THF (50 mL) was added **11** (1.75 g, 5.0 mmol) at 0 °C. The reaction mixture was stirred at 0 °C under argon for 0.5 h, added **9** (540  $\mu\text{L}$ , 5.0 mmol) at 0 °C, stirred for 1 h at 0 °C, quenched with sat.  $\text{NH}_4\text{Cl}$ , and extracted with  $\text{Et}_2\text{O}$  (x2). The combined organic layers were washed with brine, dried over anhydrous  $\text{MgSO}_4$ , filtered, and concentrated under reduced pressure. The residue was purified by flash column chromatography on silica gel to give **11** (612 mg, 41%) as colorless oil: FTIR (neat) 2956, 2930, 2856, 1670, 1675, 1472, 1255, 1102  $\text{cm}^{-1}$ ;  $^1\text{H}$  NMR (500 MHz,  $\text{CDCl}_3$ )  $\delta$  6.80 (dt, *J* = 19.8, 9.3 Hz, 1H), 6.05-6.11 (m, 1H), 3.62 (t, *J* = 7.9 Hz, 2H), 2.56 (t, *J* = 9.0 Hz, 2H), 2.07-2.12 (m, 2H), 1.73-1.82 (m, 1H), 1.63-1.72 (m, 2H), 1.50-1.58 (m, 2H), 0.93 (d, *J* = 8.3 Hz, 6H), 0.89 (s, 9H), 0.04 (s, 6H);  $^{13}\text{C}$  NMR (125 MHz,  $\text{CDCl}_3$ )  $\delta$  200.6, 146.1, 131.3, 62.9, 41.7, 39.8, 32.3, 27.9, 25.9, 22.4, 20.8, 18.3, -5.3; LRMS (CI) *m/z* ( $\text{M}+\text{H}$ )<sup>+</sup> calcd for  $[\text{C}_{17}\text{H}_{34}\text{O}_2\text{Si}+\text{H}]^+$  299.2, found 299.1.

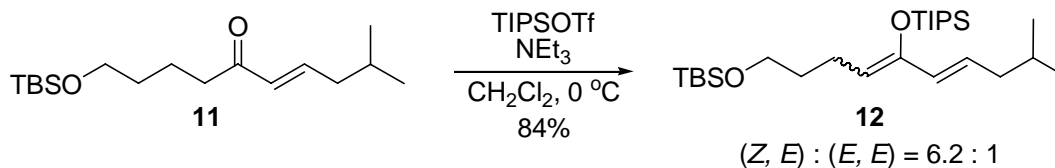

To a solution of **11** (553 mg, 1.86 mmol) in  $\text{CH}_2\text{Cl}_2$  (10 mL) was added  $\text{NEt}_3$  (285  $\mu\text{L}$ , 2.05 mmol) and TIPSOTf (501  $\mu\text{L}$ , 1.86 mmol) at 0  $^\circ\text{C}$ . The reaction mixture was stirred at 0  $^\circ\text{C}$  under argon for 1 h, quenched with sat.  $\text{NaHCO}_3$ , and extracted with hexane (x2). The combined organic layers were washed with brine, dried over anhydrous  $\text{MgSO}_4$ , filtered, and concentrated under reduced pressure. The residue was purified by flash column chromatography on silica gel to give **12** (710 mg, 84%) as colorless oil: FTIR (neat) 2953, 2867, 1464, 1367, 1255, 1103  $\text{cm}^{-1}$ ;  $^1\text{H}$  NMR (500 MHz,  $\text{CDCl}_3$ )  $\delta$  5.74-5.83 (m, 2H), 4.62 (t,  $J = 7.1$  Hz, 1H), 3.59-3.64 (m, 2H), 2.10-2.19 (m, 2H), 1.94-1.97 (m, 2H), 1.53-1.67 (m, 3H), 1.16-1.22 (m, 3H), 1.07-1.12 (m, 18H), 0.88-0.90 (m, 15H), 0.04 (s, 6H);  $^{13}\text{C}$  NMR (125 MHz,  $\text{CDCl}_3$ )  $\delta$  149.2, 130.2, 127.7, 111.1, 63.1, 41.8, 33.7, 32.9, 28.6, 26.0, 22.4, 22.3, 18.1, 13.8, -5.34; LRMS (CI)  $m/z$  ( $\text{M}+\text{H}$ ) $^+$  calcd for  $[\text{C}_{26}\text{H}_{54}\text{O}_2\text{Si}_2+\text{H}]^+$  455.4, found 455.3.

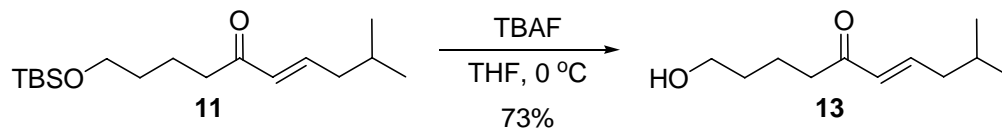

To a solution of **11** (2.05 g, 6.88 mmol) in THF (70 mL) was added TBAF (1M solution in THF, 10.3 mL, 10.3 mmol) at 0  $^\circ\text{C}$ . The reaction mixture was stirred at 0  $^\circ\text{C}$  under argon for 2 h, quenched with sat.  $\text{NH}_4\text{Cl}$ , and extracted with  $\text{Et}_2\text{O}$  (x2). The combined organic layers were washed with brine, dried over anhydrous  $\text{MgSO}_4$ , filtered, and concentrated under reduced pressure. The residue was purified by flash column chromatography on silica gel to give **13** (924 mg, 73%) as colorless oil: FTIR (neat) 3421, 2956, 2870, 1670, 1628, 1465, 1368  $\text{cm}^{-1}$ ;  $^1\text{H}$  NMR (500 MHz,  $\text{CDCl}_3$ )  $\delta$  6.79-6.86 (m, 1H), 6.07-6.12 (m, 1H), 3.63 (t,  $J = 6.4$  Hz, 2H), 2.60 (t,  $J = 7.2$  Hz, 2H), 2.27 (br s, 1H), 2.09-2.12 (m, 2H), 1.68-1.81 (m, 3H), 1.55-1.62 (m, 2H), 0.93 (d,  $J = 6.6$  Hz, 6H);  $^{13}\text{C}$  NMR (125 MHz,  $\text{CDCl}_3$ )  $\delta$  200.8, 146.6, 131.2, 62.1, 41.7, 39.5, 32.1, 27.8, 22.4, 20.1; LRMS (CI)  $m/z$  ( $\text{M}+\text{H}$ ) $^+$  calcd for  $[\text{C}_{11}\text{H}_{20}\text{O}_2+\text{H}]^+$  185.1, found 185.1.

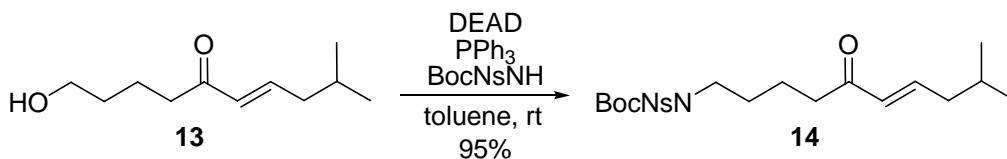

To a solution of **13** (1.04 g, 6.12 mmol) in toluene (30 mL) was added  $\text{PPh}_3$  (1.92 g, 7.34 mmol),  $\text{BocNsNH}$  (2.22 g, 7.34 mmol), and  $\text{DEAD}$  (1.16 mL, 7.34 mmol) at room temperature. The reaction mixture was stirred at room temperature under argon for 0.5 h and concentrated under reduced pressure. The residue was purified by flash column chromatography on silica gel to give **14** (2.72 g, 95%) as colorless oil: FTIR (neat) 2957, 1734, 1542, 1367, 1153  $\text{cm}^{-1}$ ;  $^1\text{H}$  NMR (500 MHz,  $\text{CDCl}_3$ )  $\delta$  8.29-8.32 (m, 1H), 7.72-7.76 (m, 3H), 6.79-6.86 (dt,  $J = 15.8, 7.4$  Hz, 1H), 6.09 (d,  $J = 15.8$  Hz, 1H), 3.78 (t,  $J = 7.0$  Hz, 2H), 2.62 (t,  $J = 7.3$  Hz, 2H), 2.09-2.13 (m, 2H), 1.69-1.81 (m, 5H), 1.36 (s, 9H), 0.93 (d,  $J = 6.6$  Hz, 6H);  $^{13}\text{C}$  NMR (125 MHz,  $\text{CDCl}_3$ )  $\delta$  200.0, 150.4, 147.6, 146.4, 134.1, 133.5, 133.3, 131.7, 131.2, 124.3, 84.9, 47.7, 41.7, 39.3, 29.8, 27.9, 27.8, 22.4, 21.2; LRMS (CI)  $m/z$  ( $\text{M}+\text{H}$ )<sup>+</sup> calcd for  $[\text{C}_{22}\text{H}_{32}\text{N}_2\text{O}_7\text{S}+\text{H}-\text{SO}_2]^+$  405.2, found 405.0.

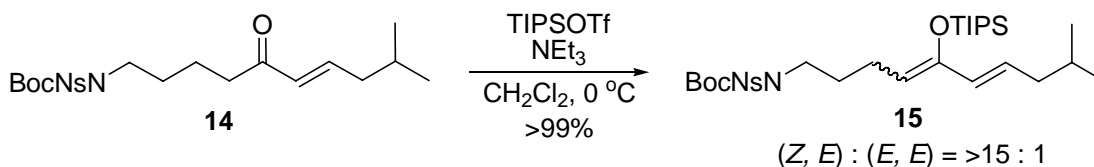

To a solution of **14** (1.72 g, 3.68 mmol) in  $\text{CH}_2\text{Cl}_2$  (20 mL) was added  $\text{NEt}_3$  (563  $\mu\text{L}$ , 4.05 mmol) and  $\text{TIPSOTf}$  (991  $\mu\text{L}$ , 3.68 mmol) at 0  $^\circ\text{C}$ . The reaction mixture was stirred at 0  $^\circ\text{C}$  under argon for 1 h, quenched with sat.  $\text{NaHCO}_3$ , and extracted with  $\text{Et}_2\text{O}$  (x2). The combined organic layers were washed with brine, dried over anhydrous  $\text{MgSO}_4$ , filtered, and concentrated under reduced pressure. The residue was purified by flash column chromatography on silica gel to give **15** (2.3 g, >99%) as colorless oil: FTIR (neat) 2949, 2868, 1733, 1542, 1458, 1368, 1282, 1154  $\text{cm}^{-1}$ ;  $^1\text{H}$  NMR (500 MHz,  $\text{CDCl}_3$ )  $\delta$  8.15-8.18 (m, 1H), 7.59-7.65 (m, 3H), 5.69-5.74 (m, 2H), 4.54 (t,  $J = 7.1$  Hz, 1H), 3.67 (t,  $J = 7.5$  Hz, 2H), 2.10 (q,  $J = 7.4$  Hz, 2H), 1.84-1.87 (m, 2H), 1.68-1.75 (m, 2H), 1.49-1.56 (m, 1H), 1.24 (s, 9H), 1.06-1.14 (m, 3H), 1.00-1.05 (m, 18H), 0.78 (d,  $J = 6.6$  Hz, 6H);  $^{13}\text{C}$  NMR (125 MHz,  $\text{CDCl}_3$ )  $\delta$  150.3, 149.8, 147.5, 134.1, 133.6, 133.1, 131.7, 130.0, 128.2, 124.3, 109.8, 84.7, 47.9, 41.7, 30.3, 28.5, 27.8, 23.0, 22.3, 18.1, 13.7, ; LRMS (CI)  $m/z$  ( $\text{M}+\text{H}$ )<sup>+</sup> calcd for  $[\text{C}_{31}\text{H}_{52}\text{N}_2\text{O}_7\text{SSi}+\text{H}]^+$  625.3, found 625.3.

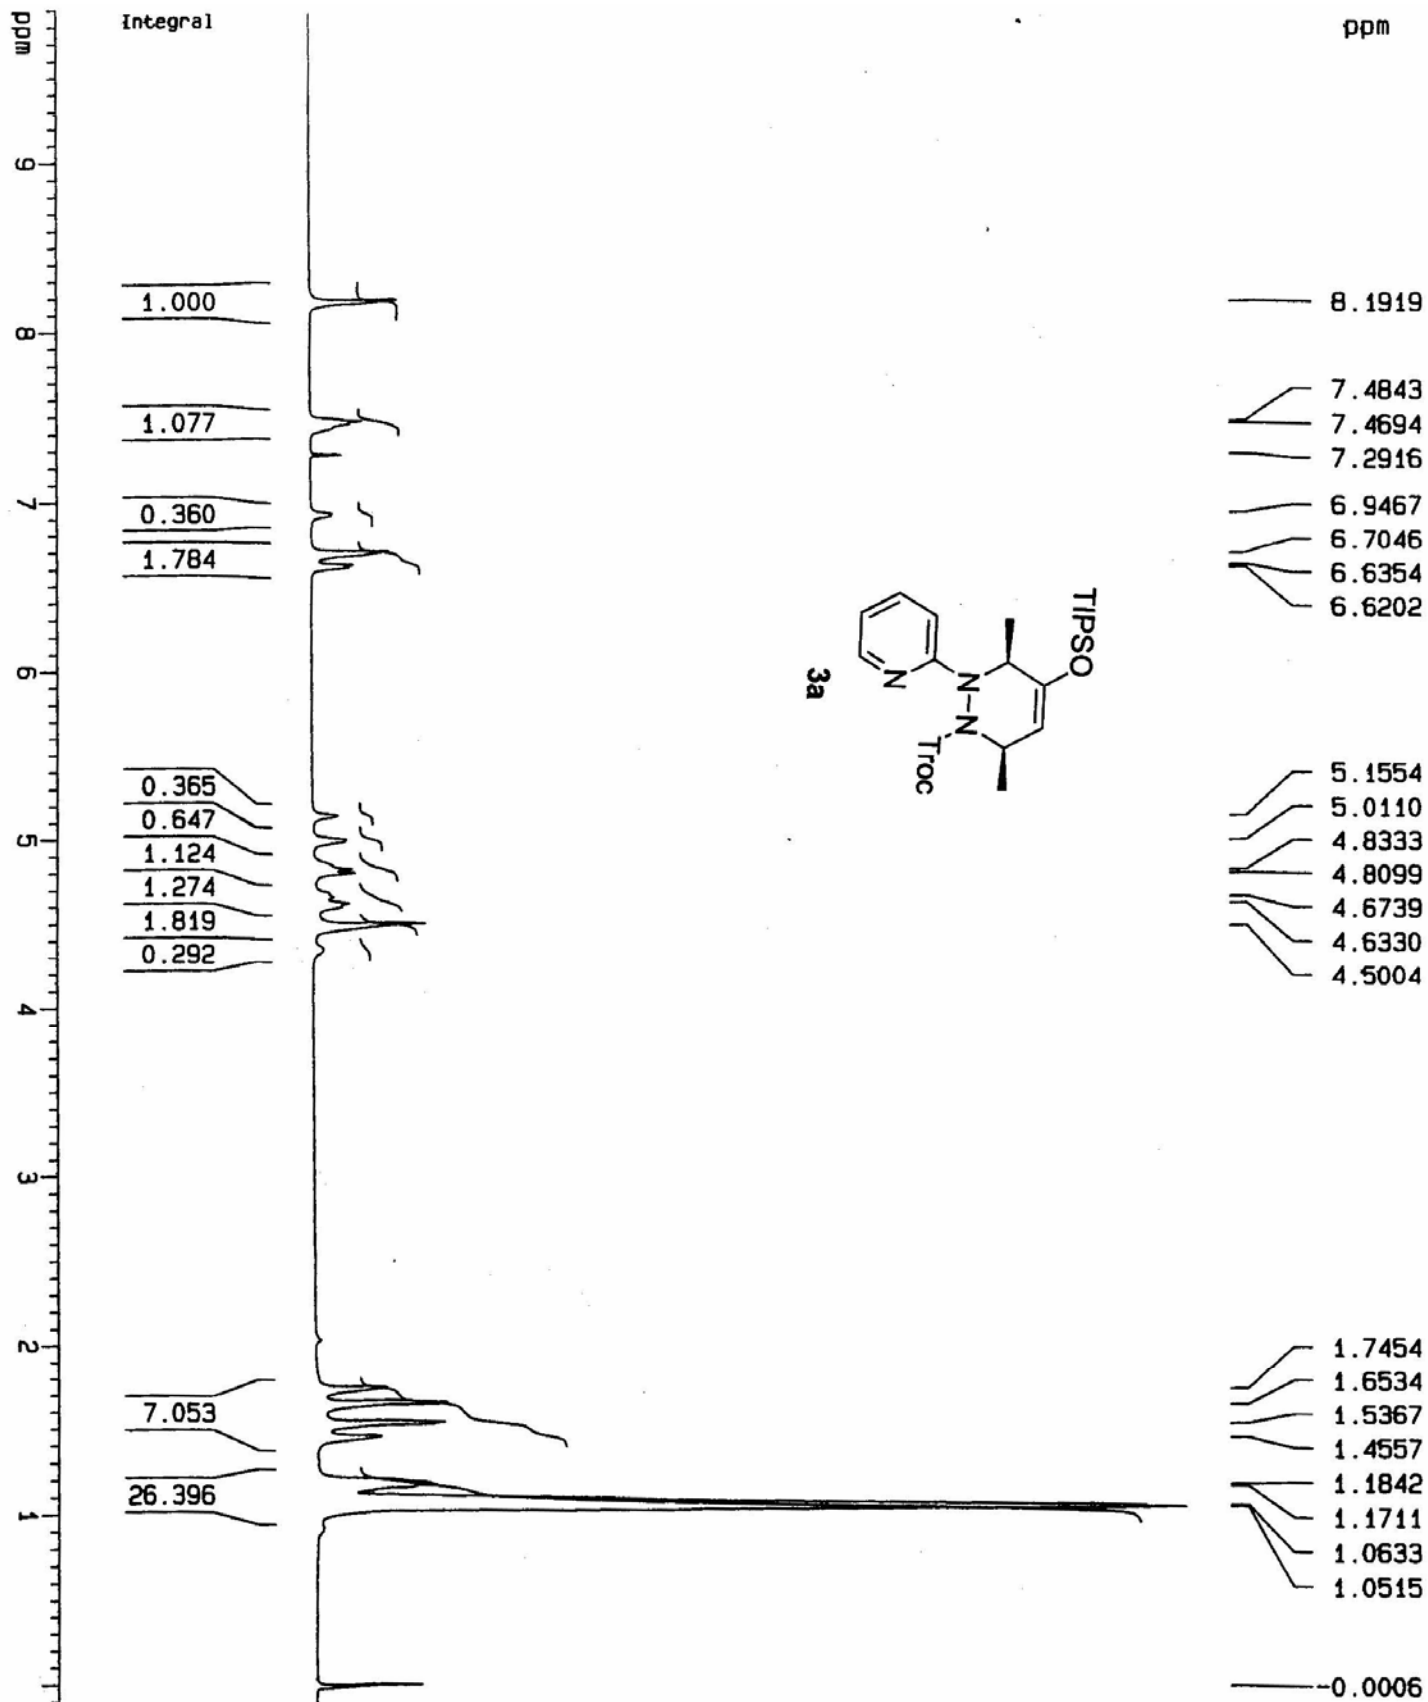

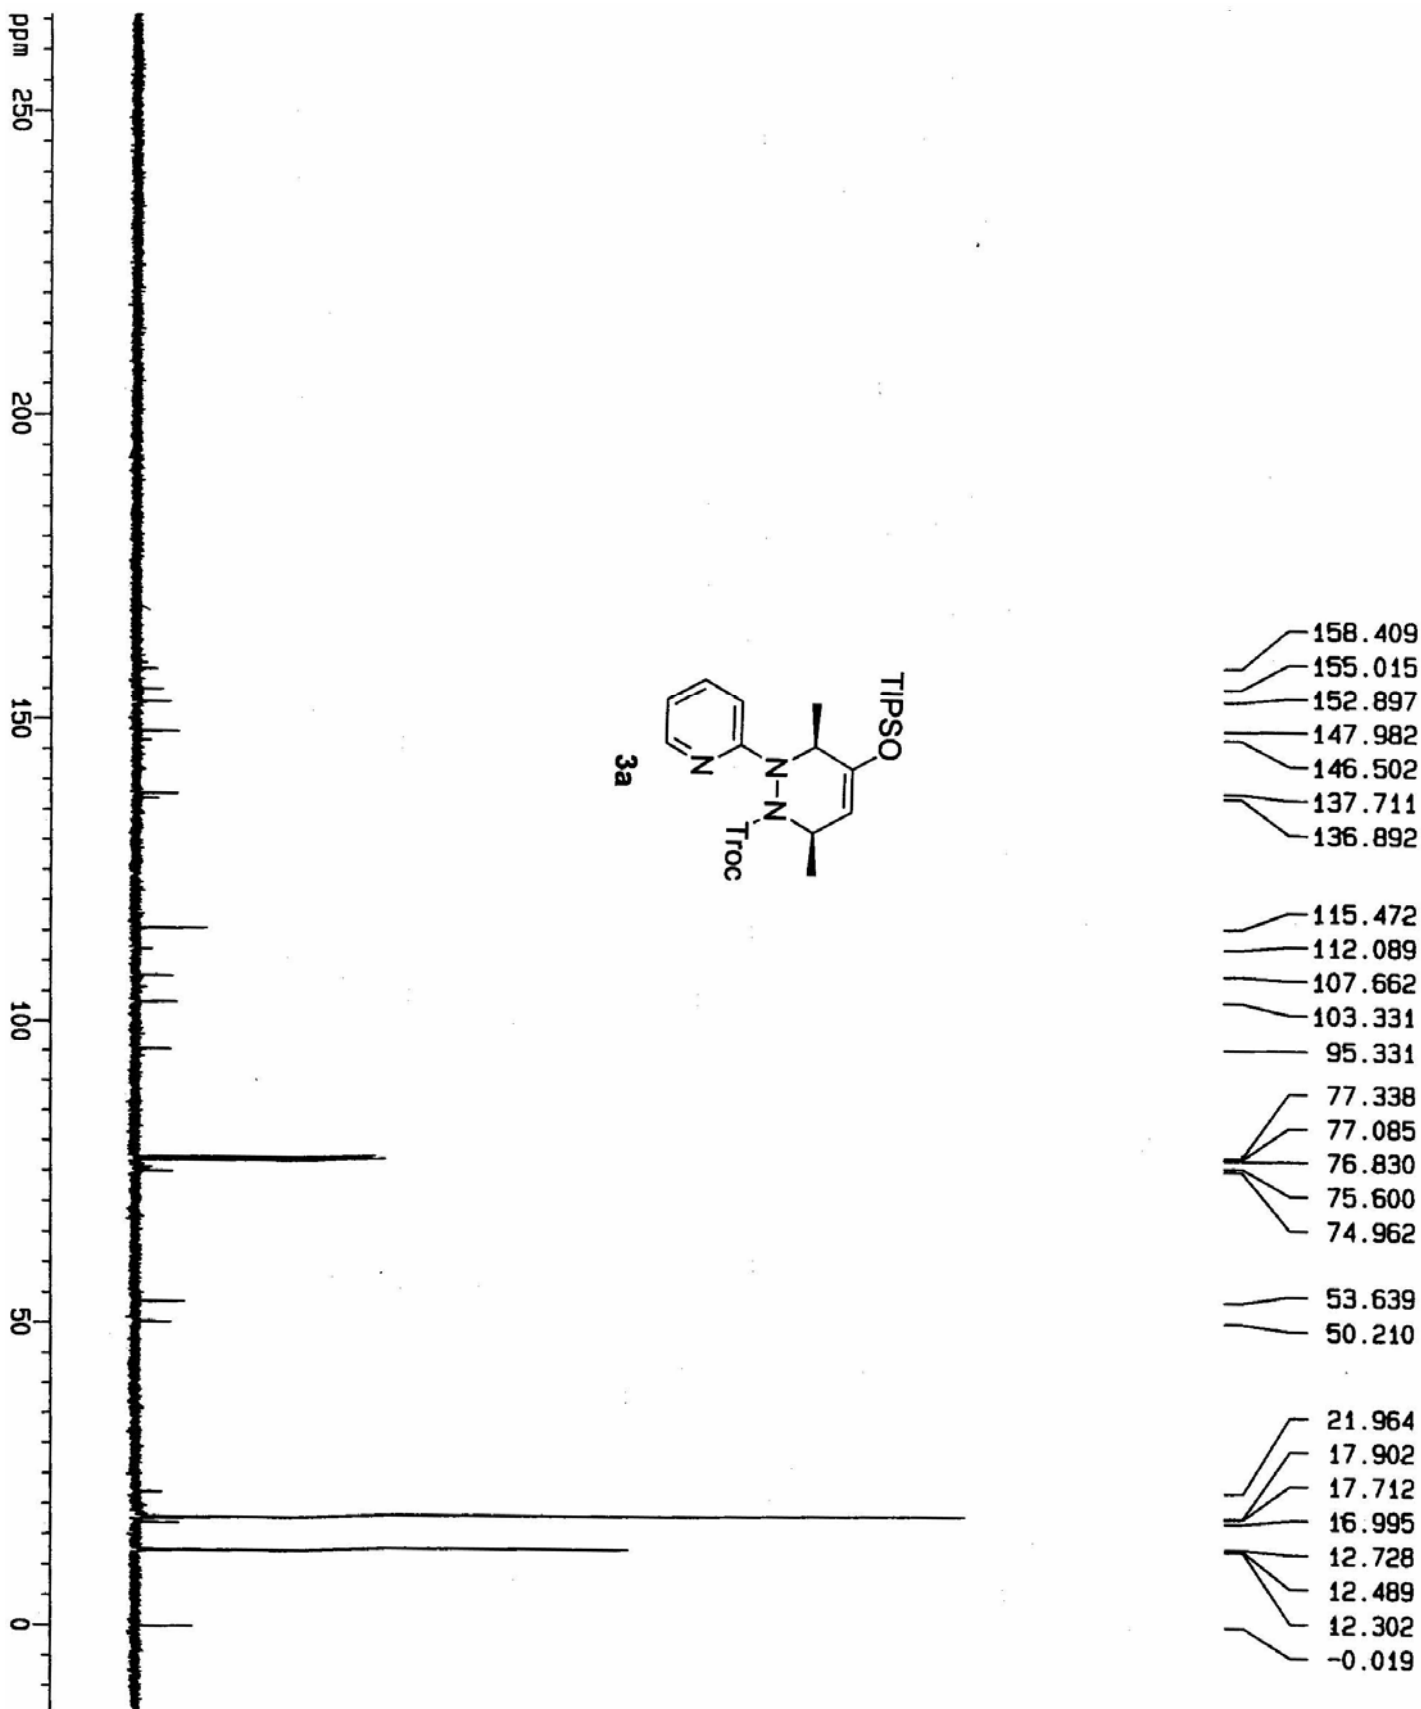

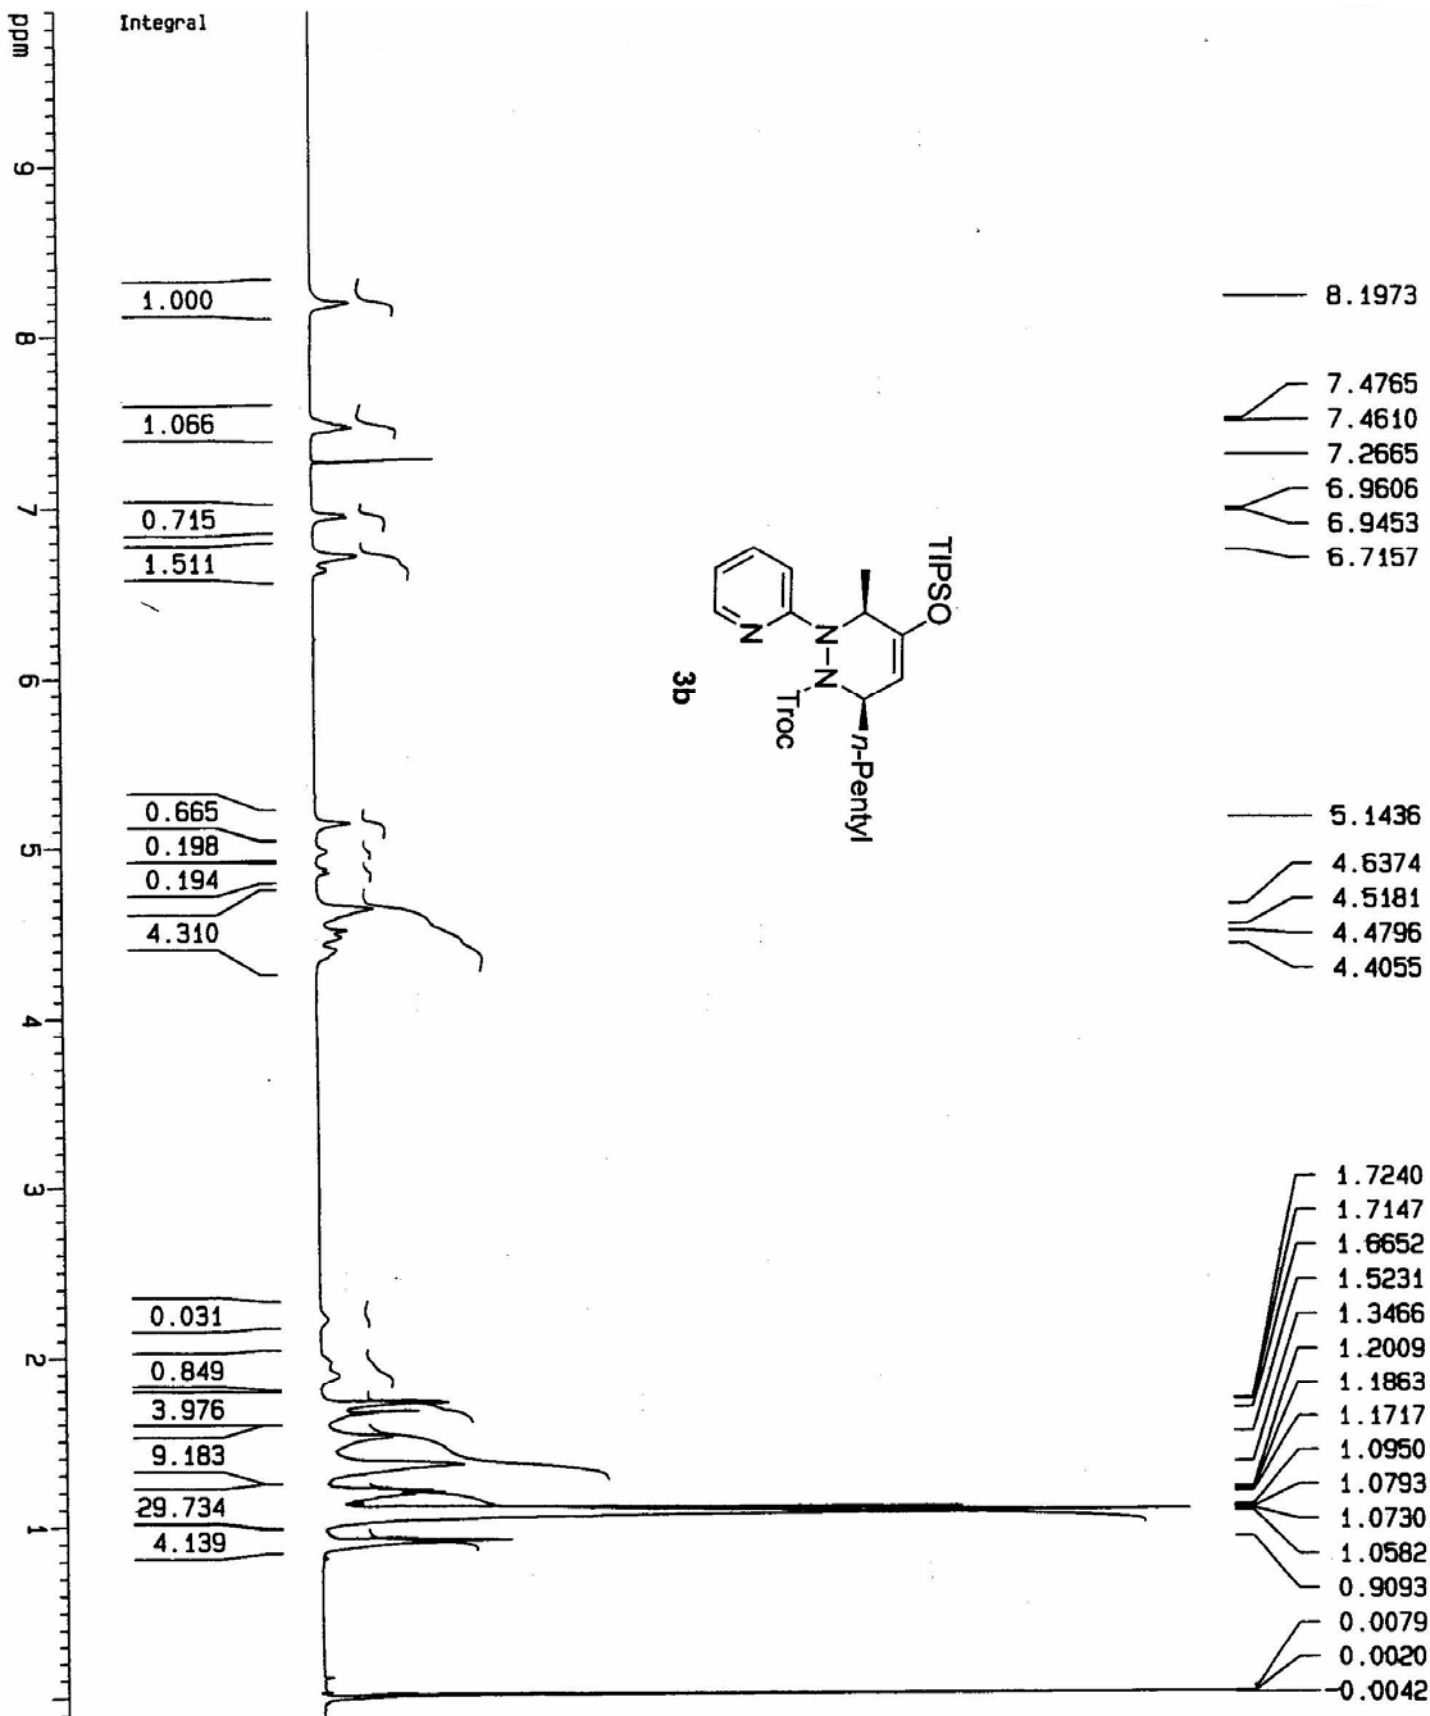



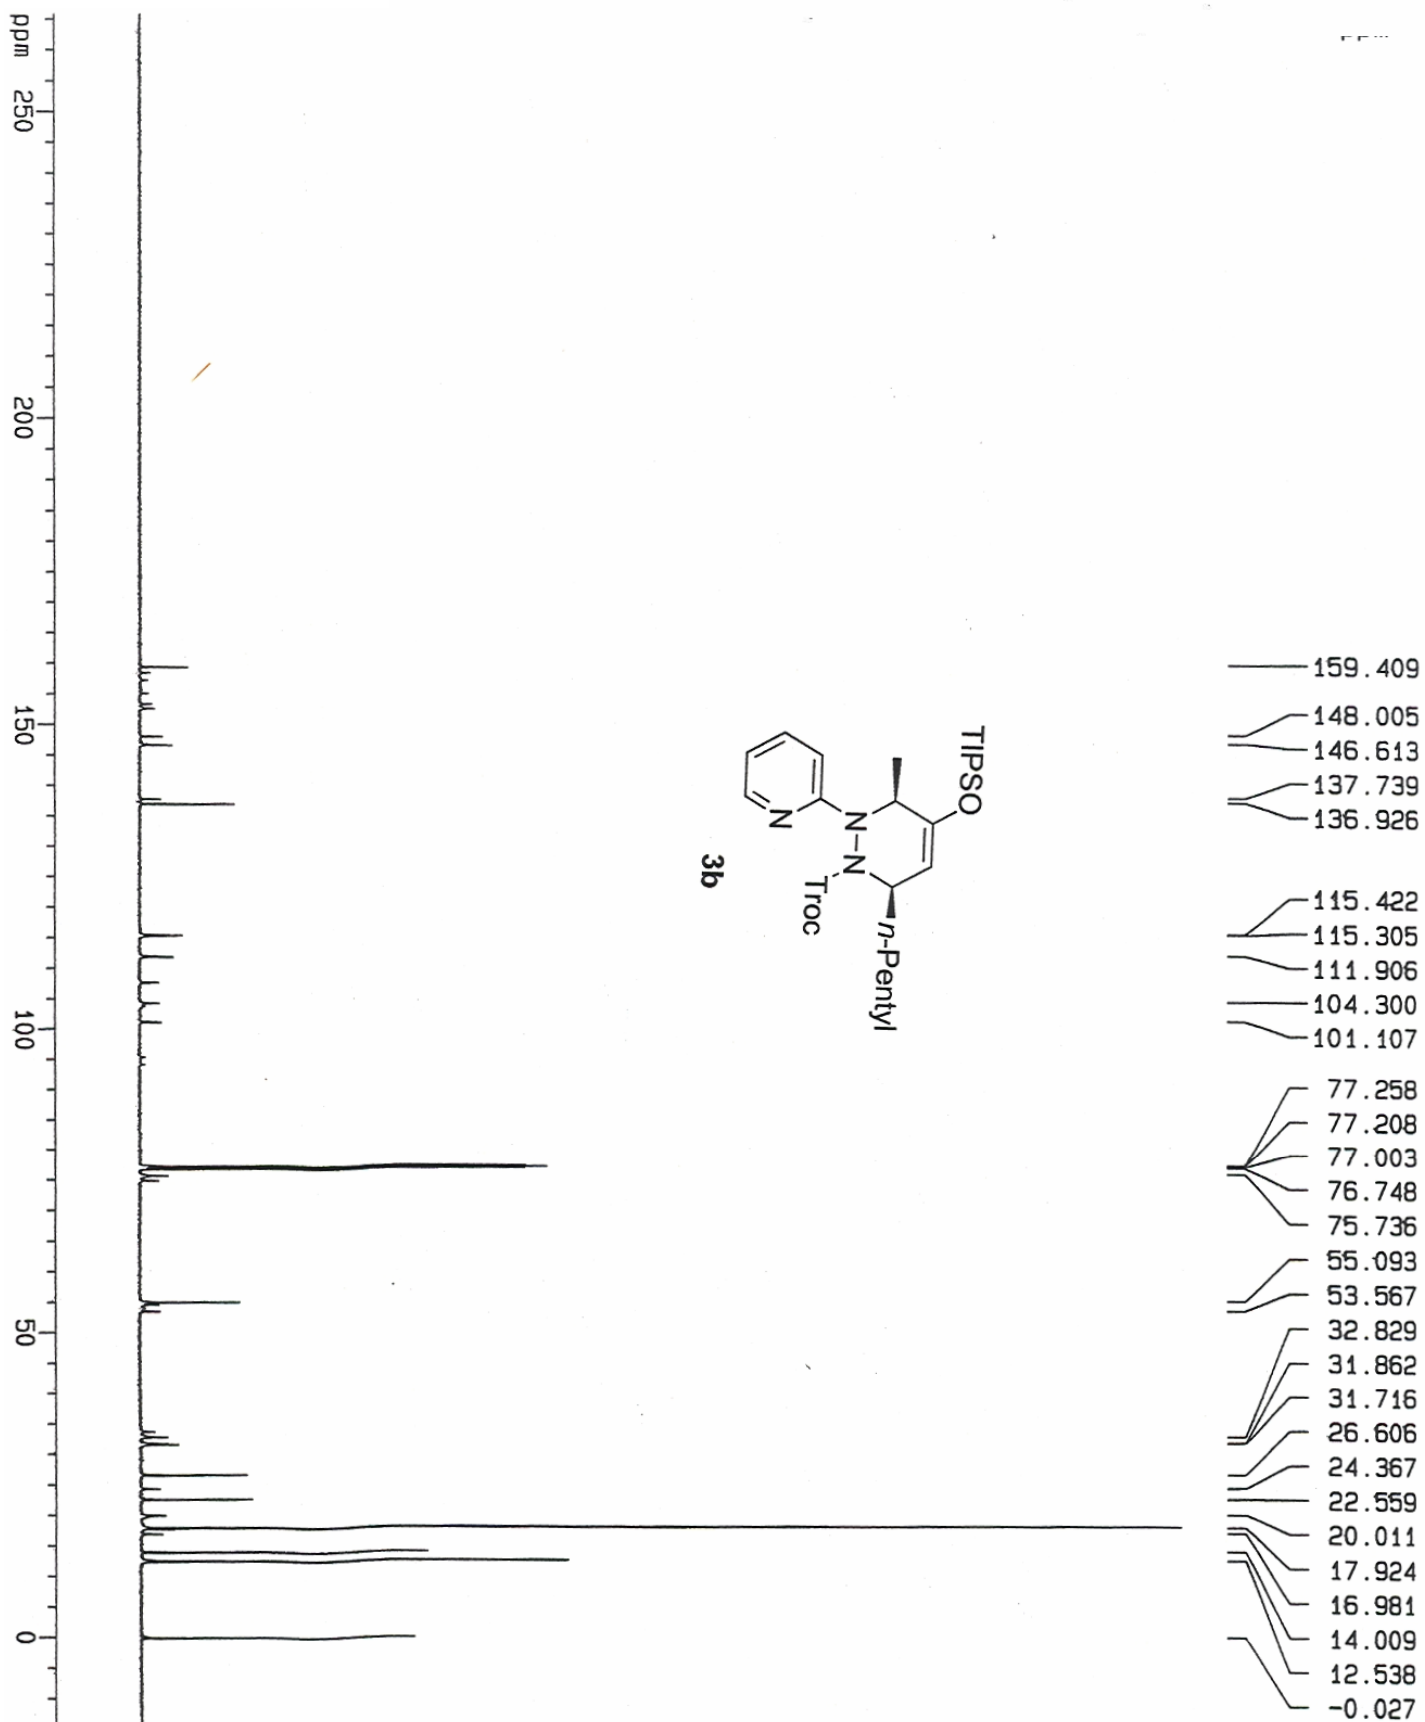

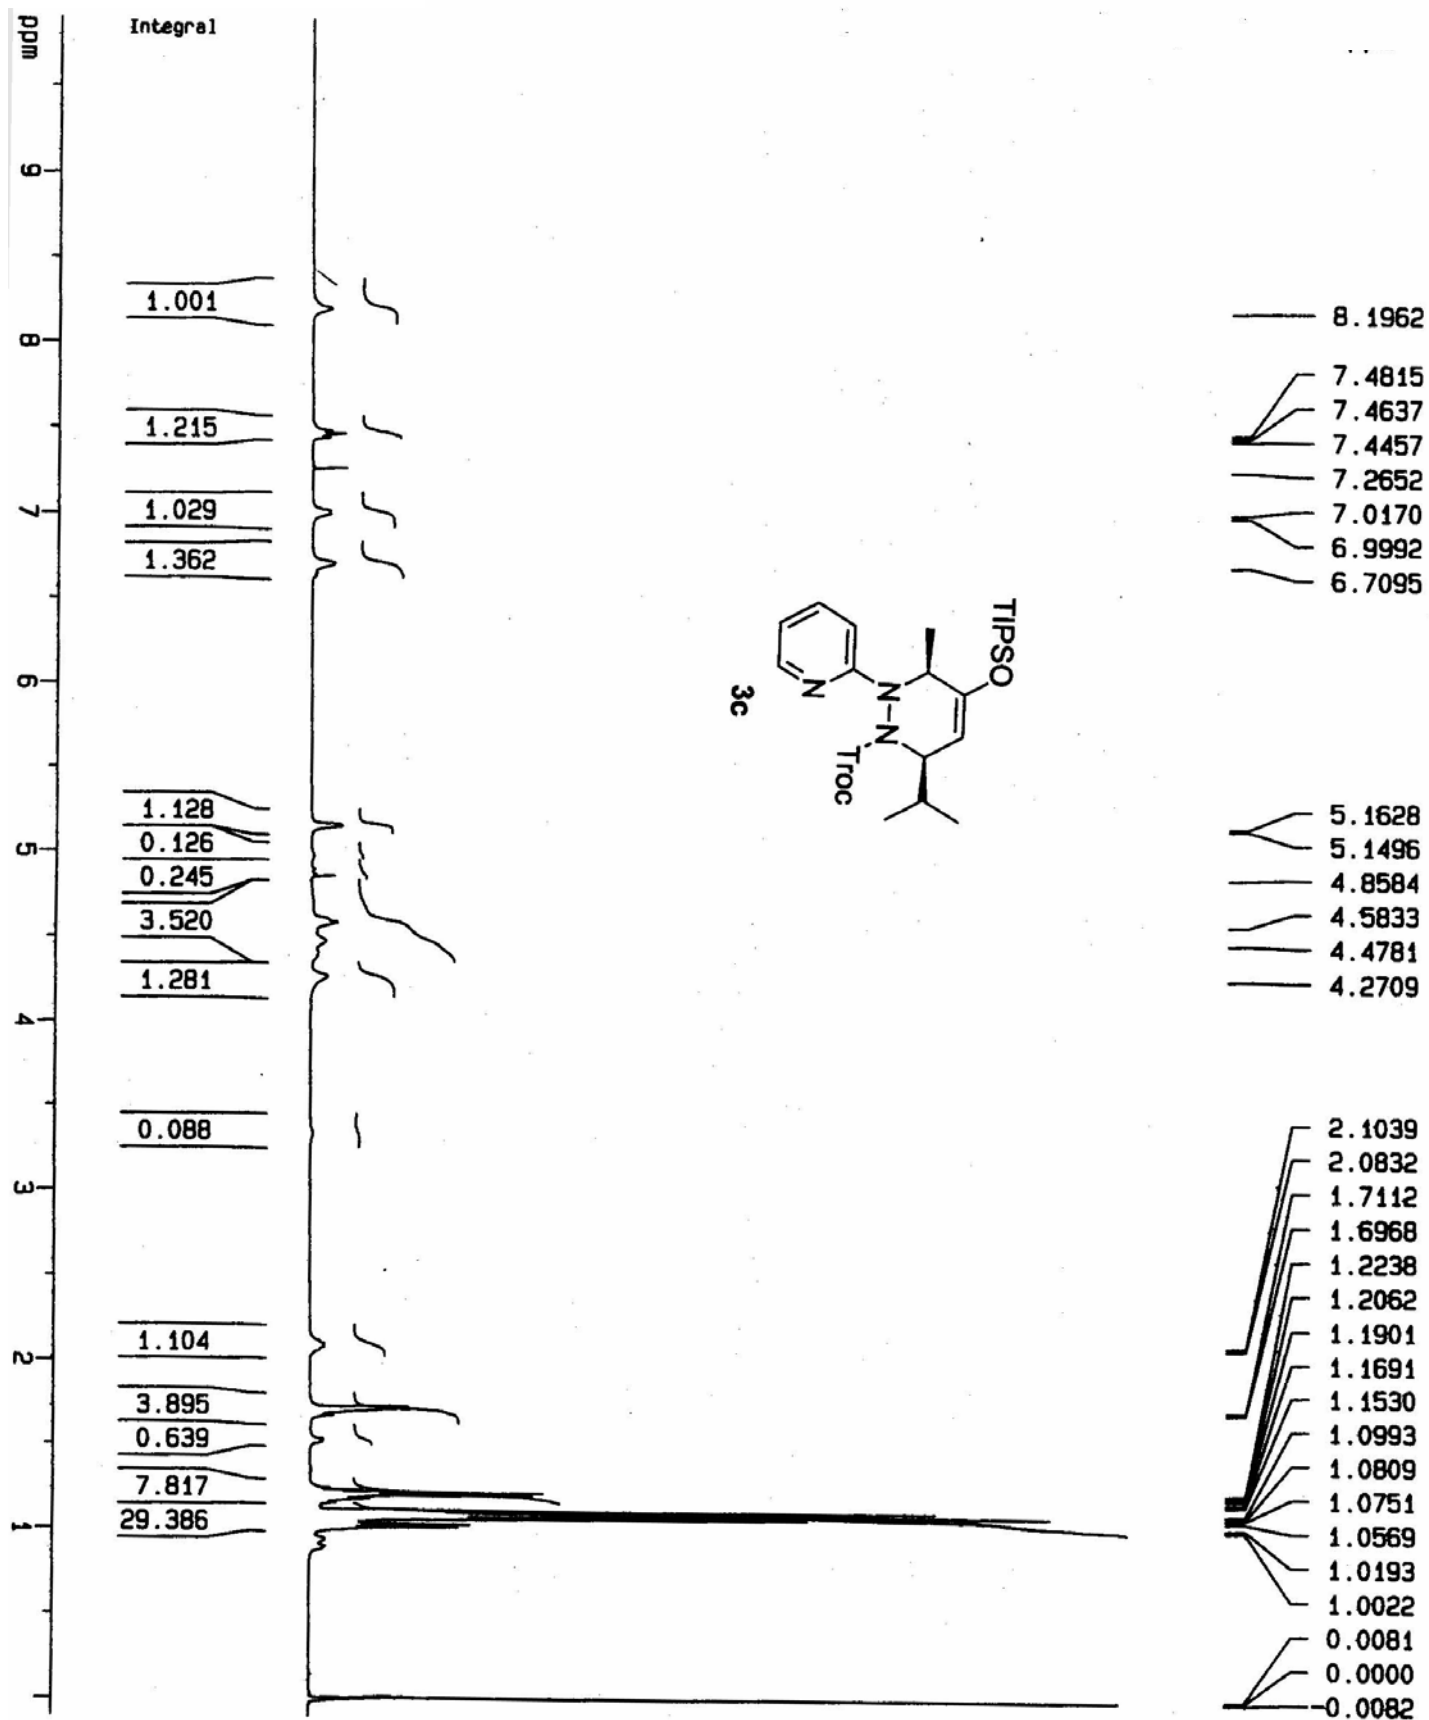

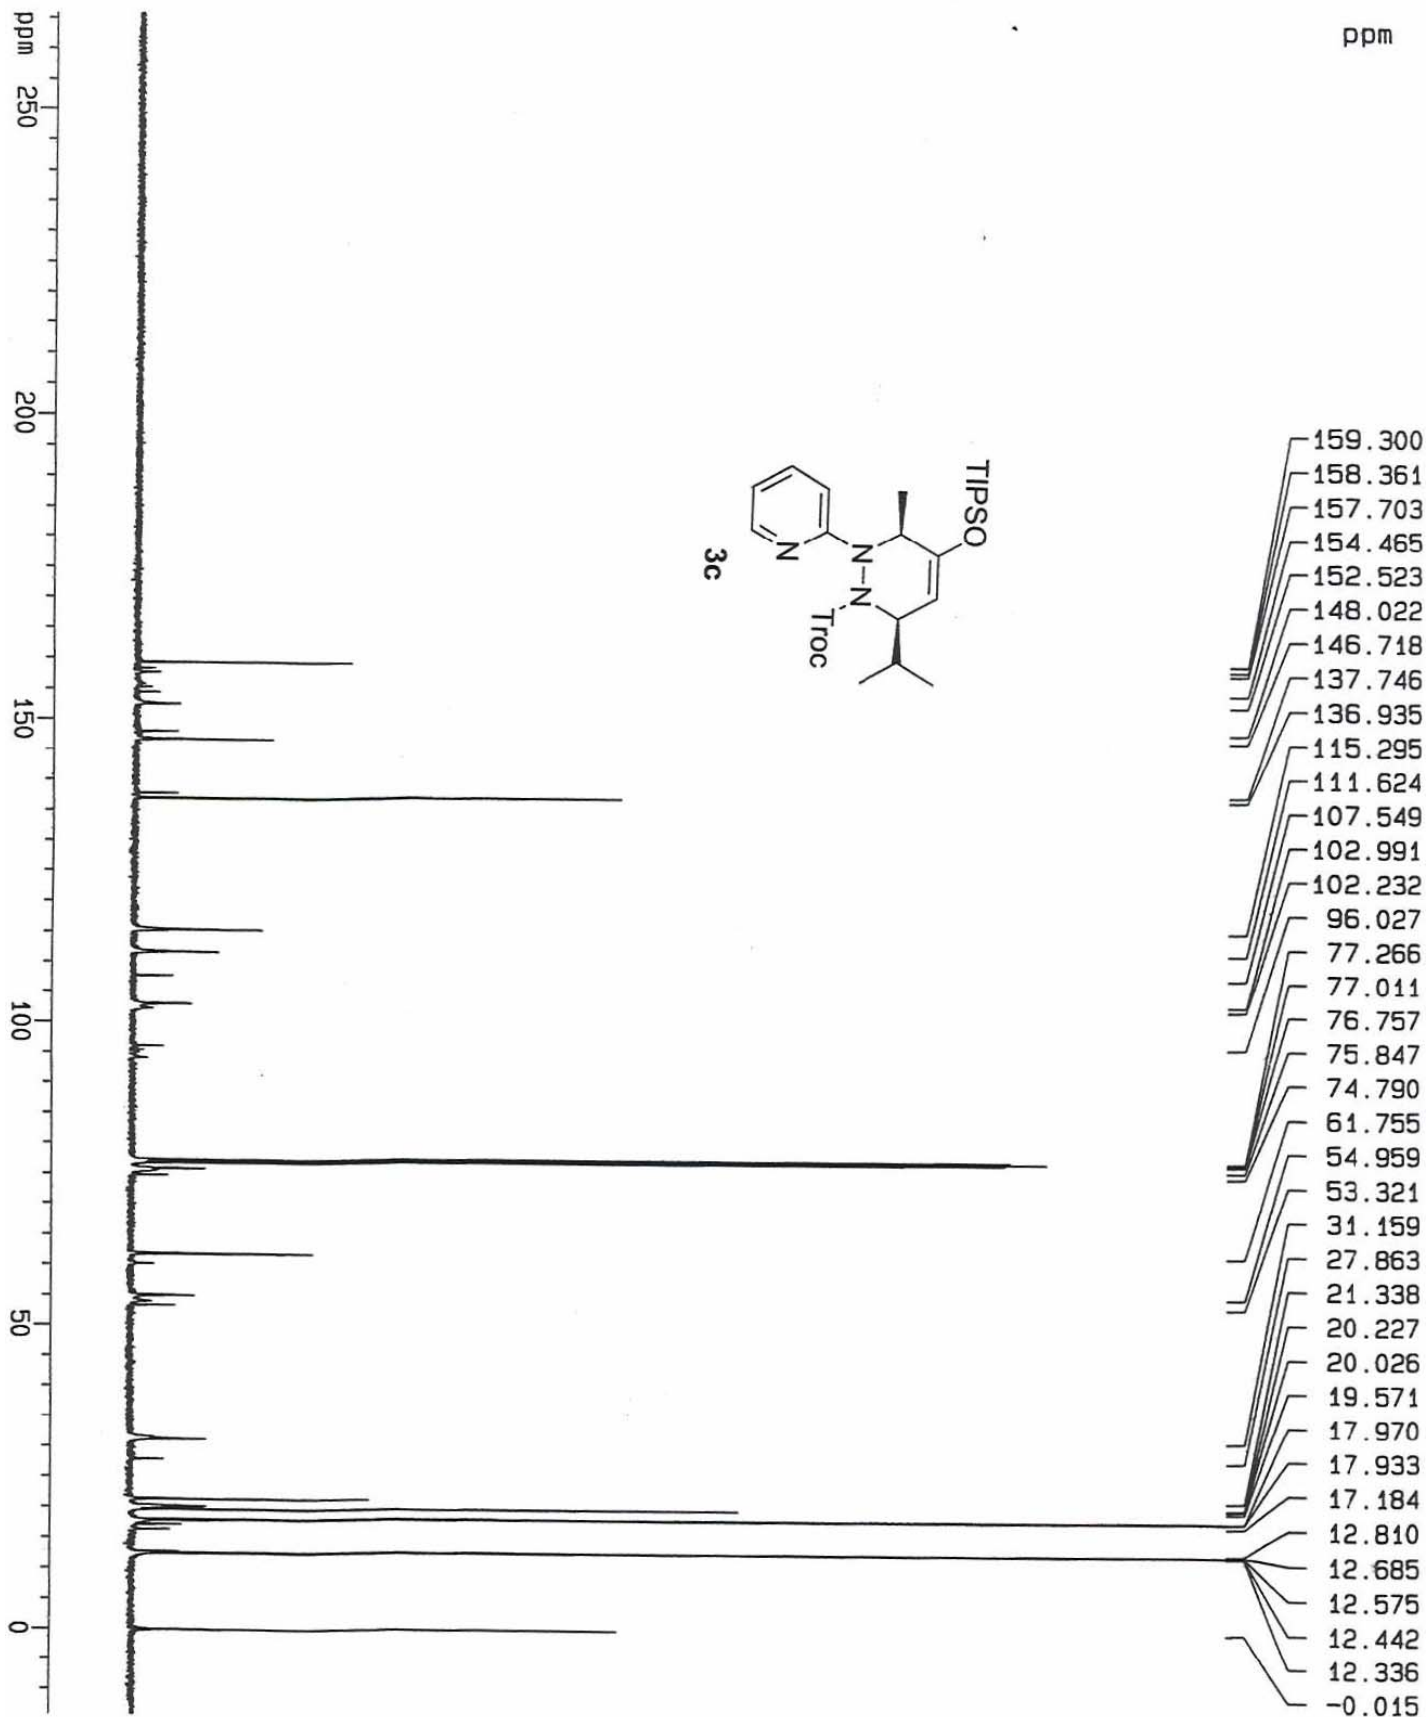

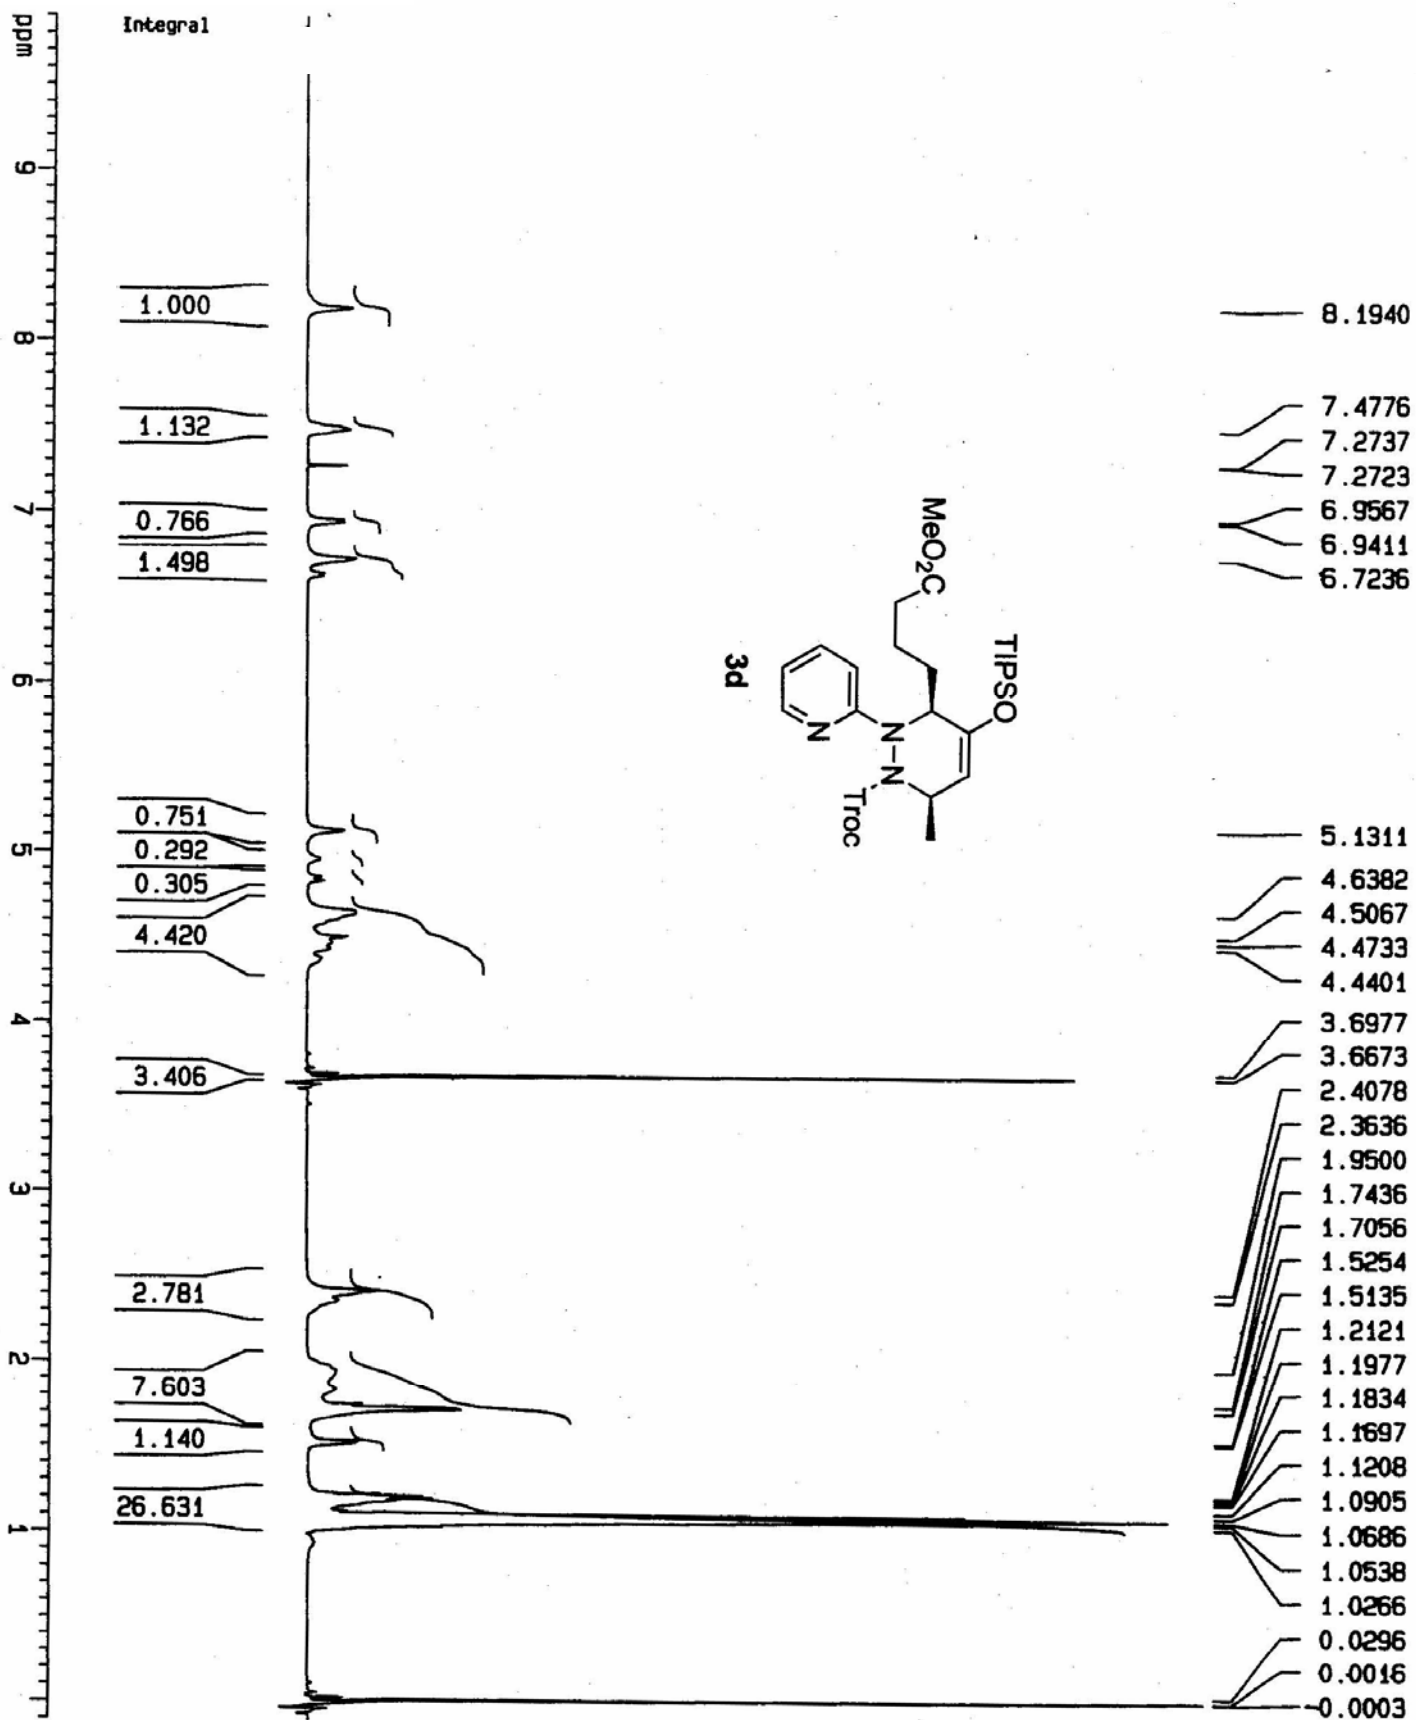

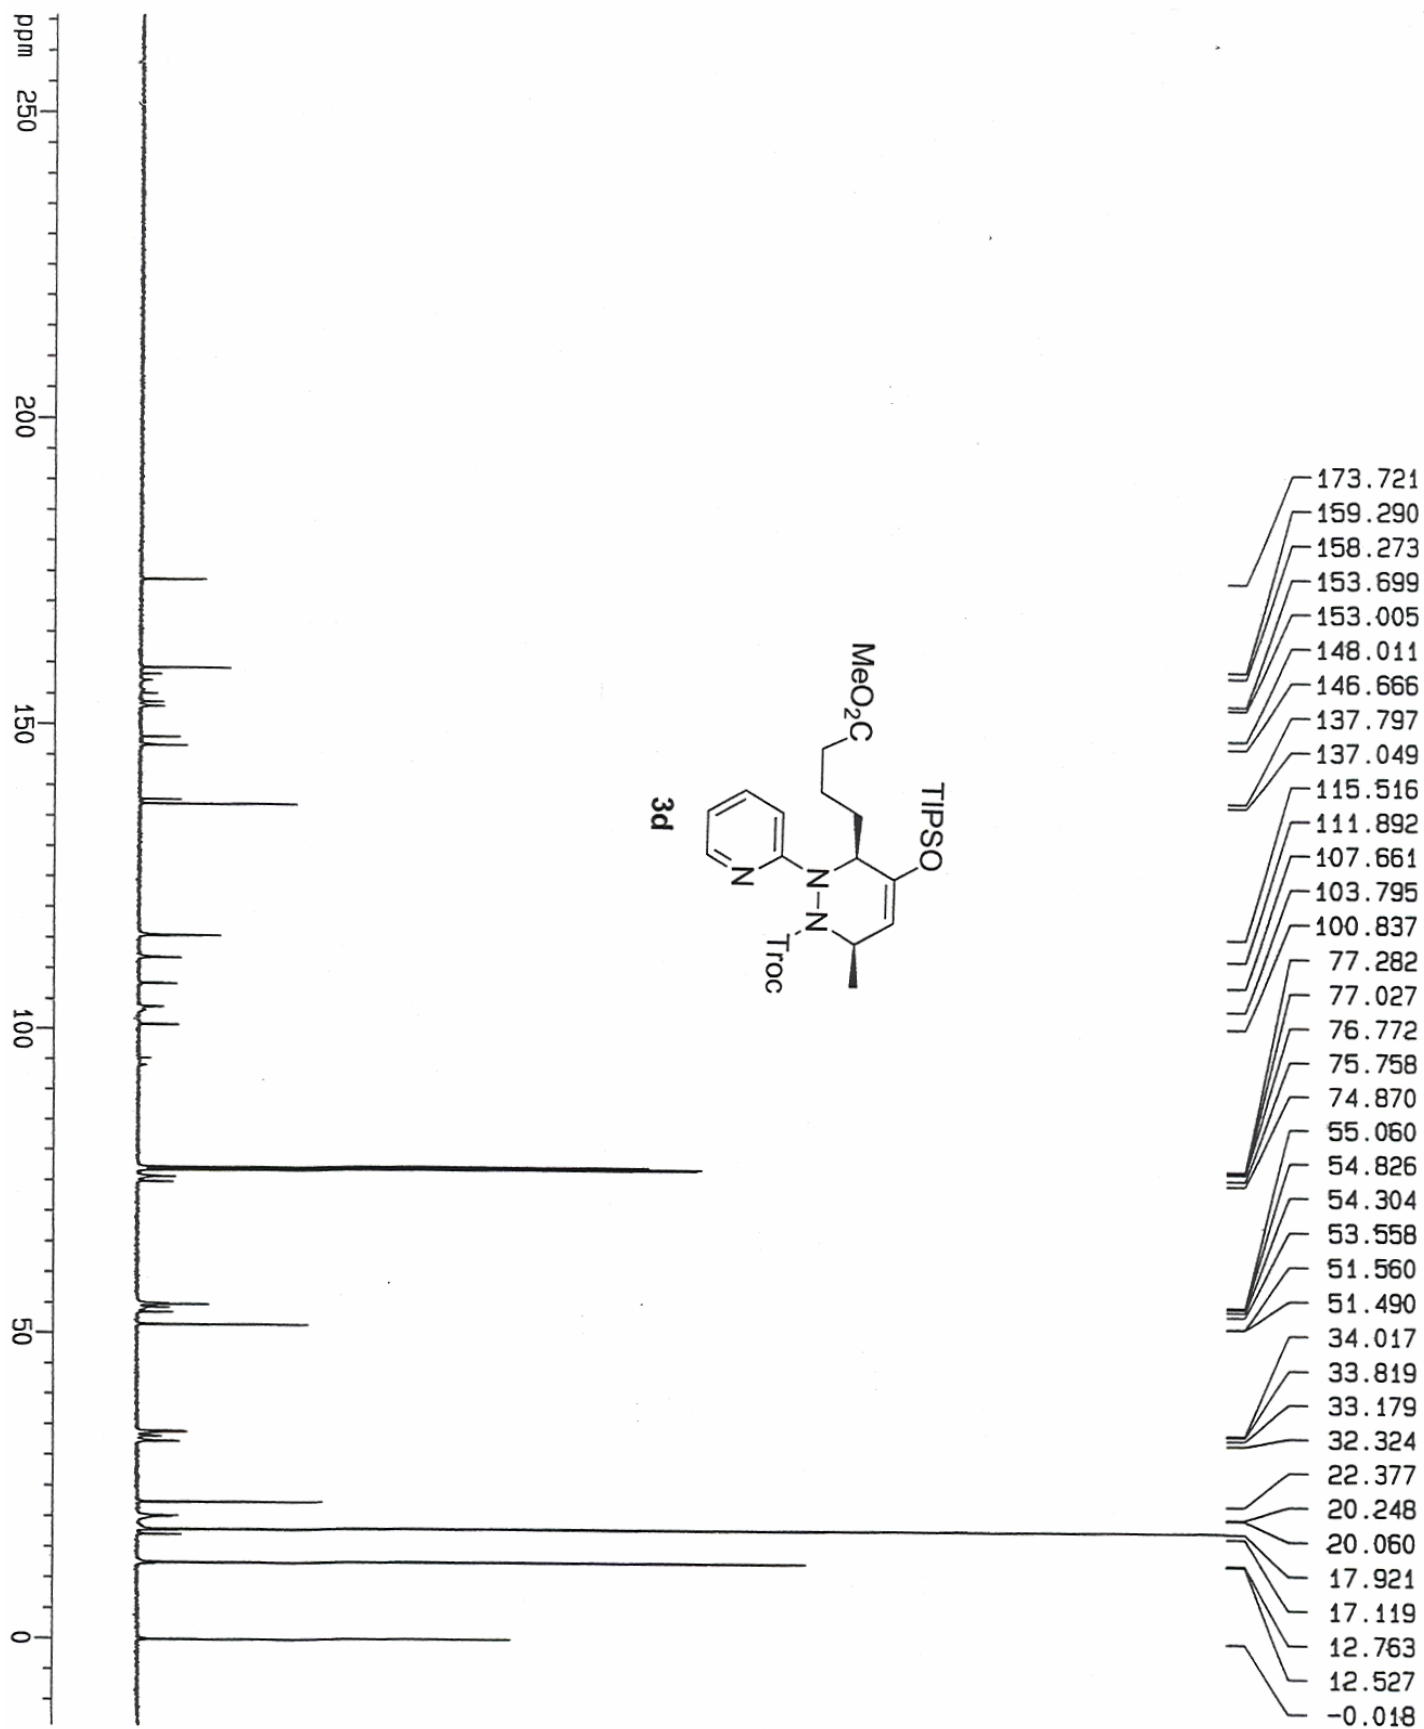

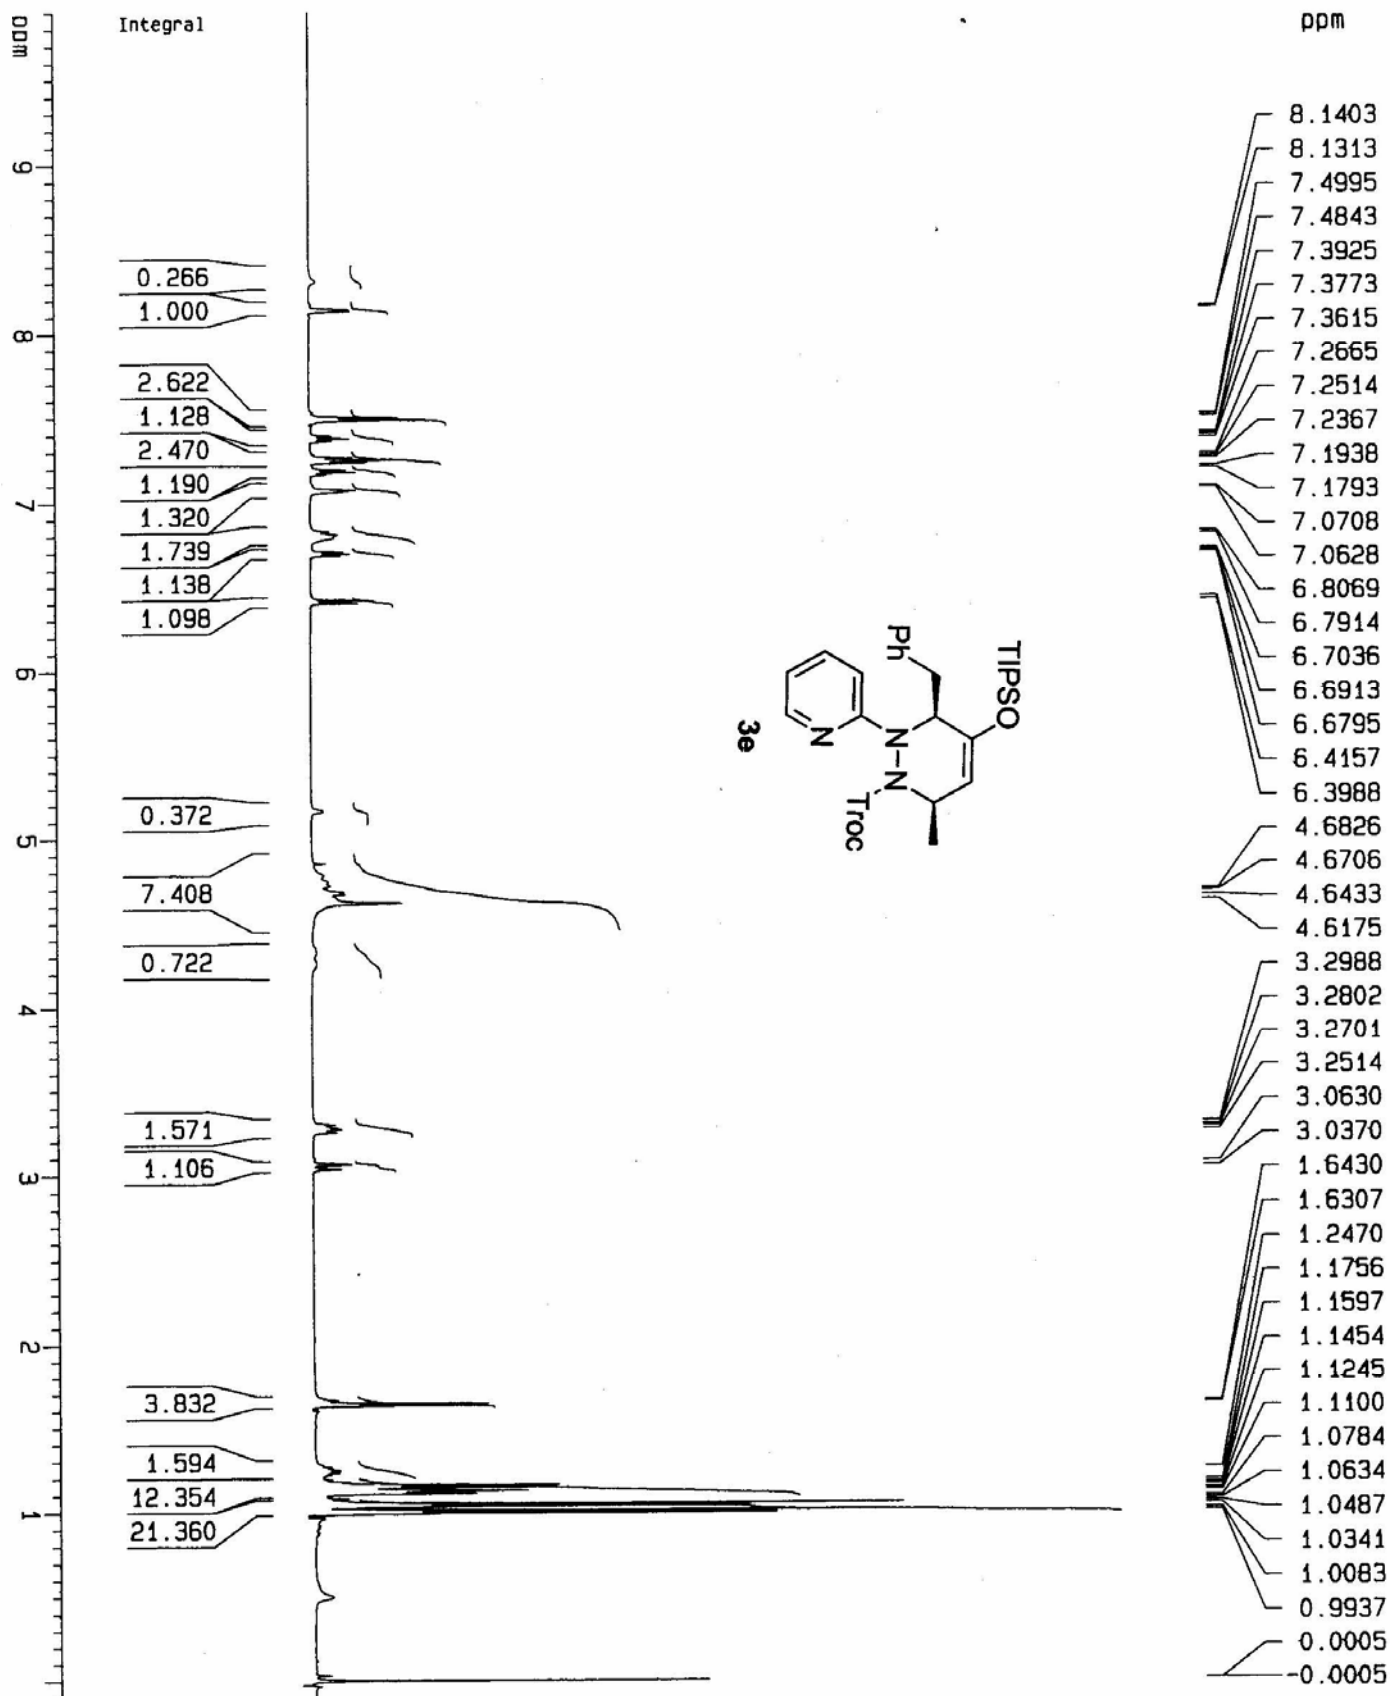

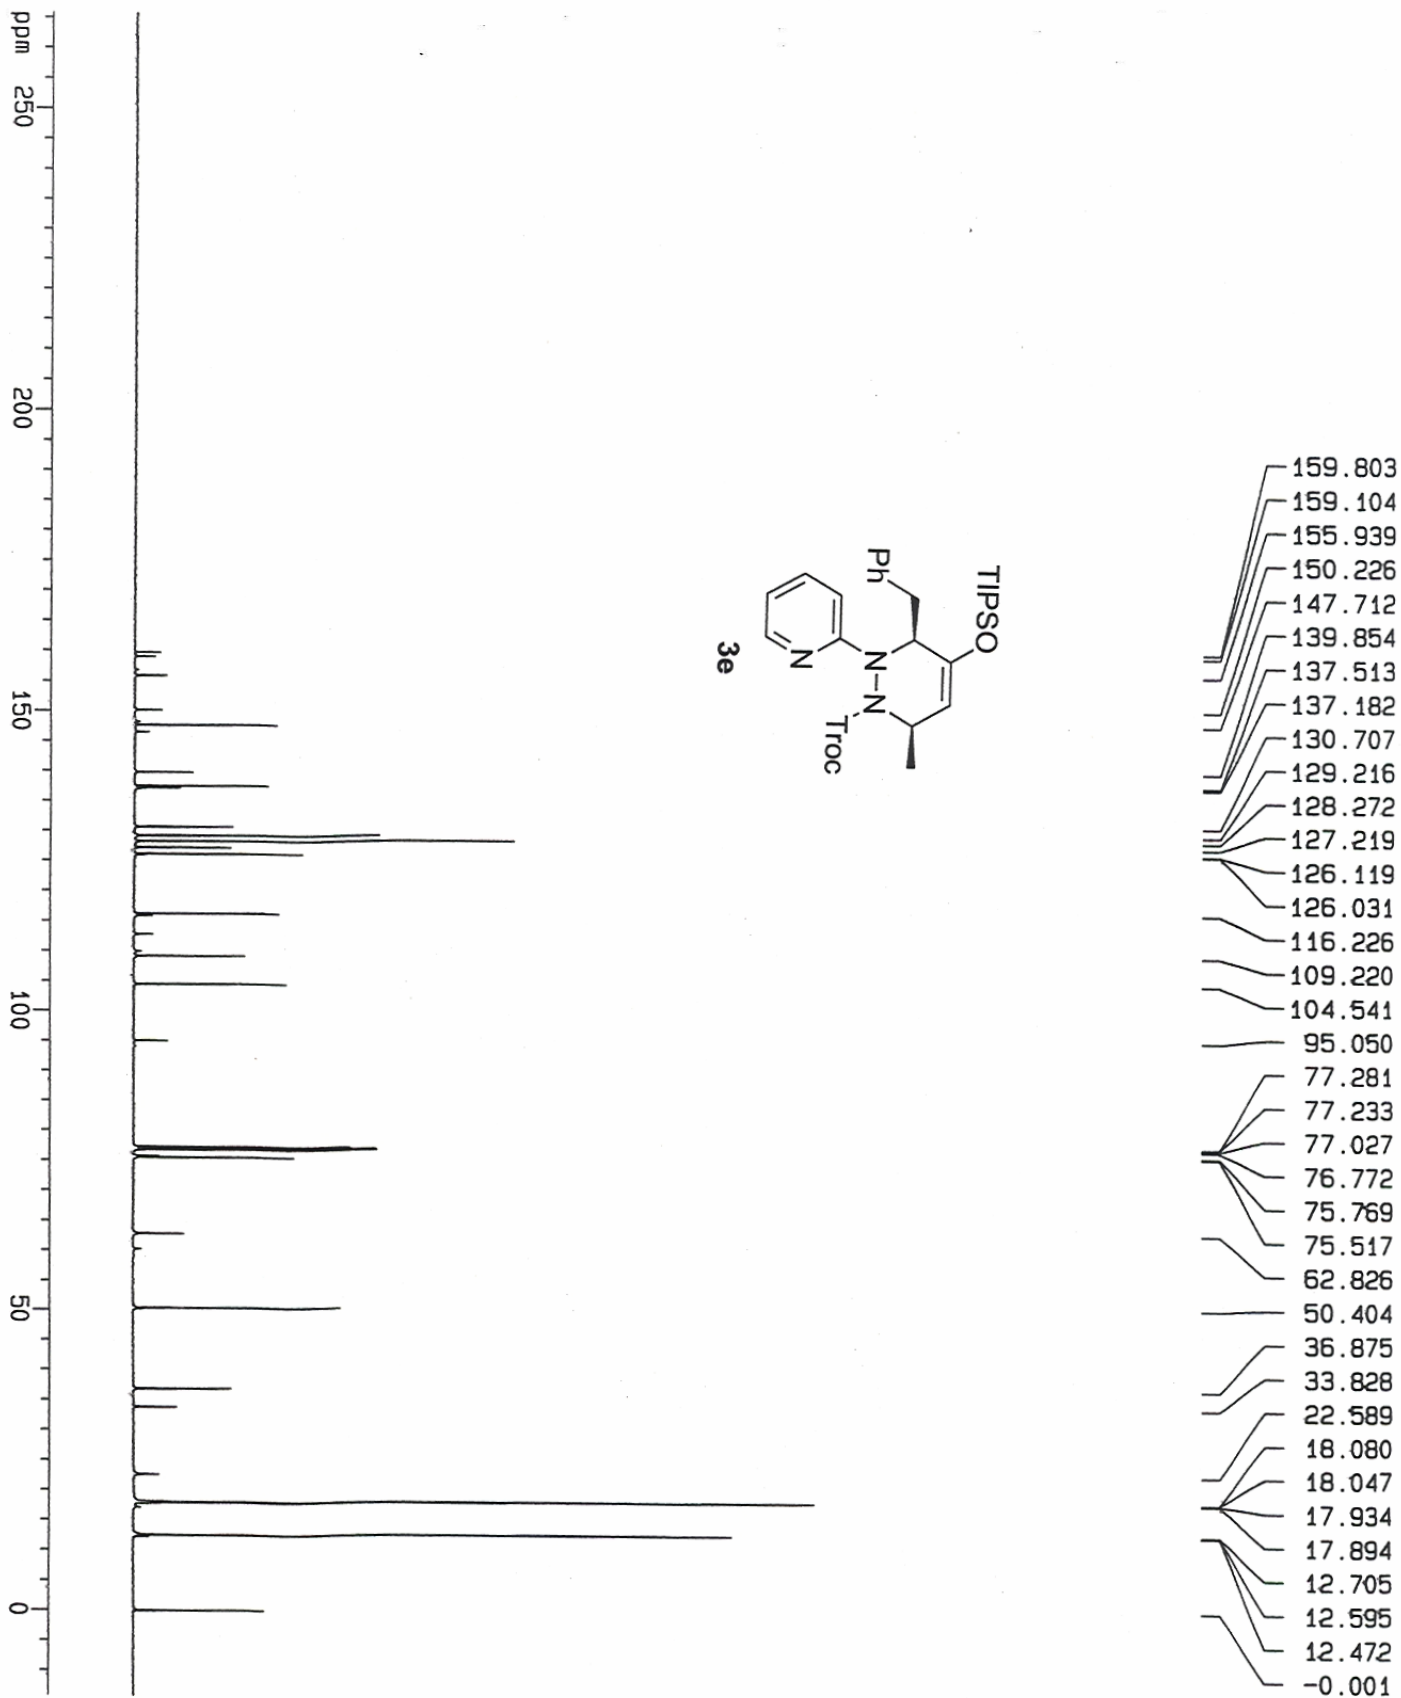

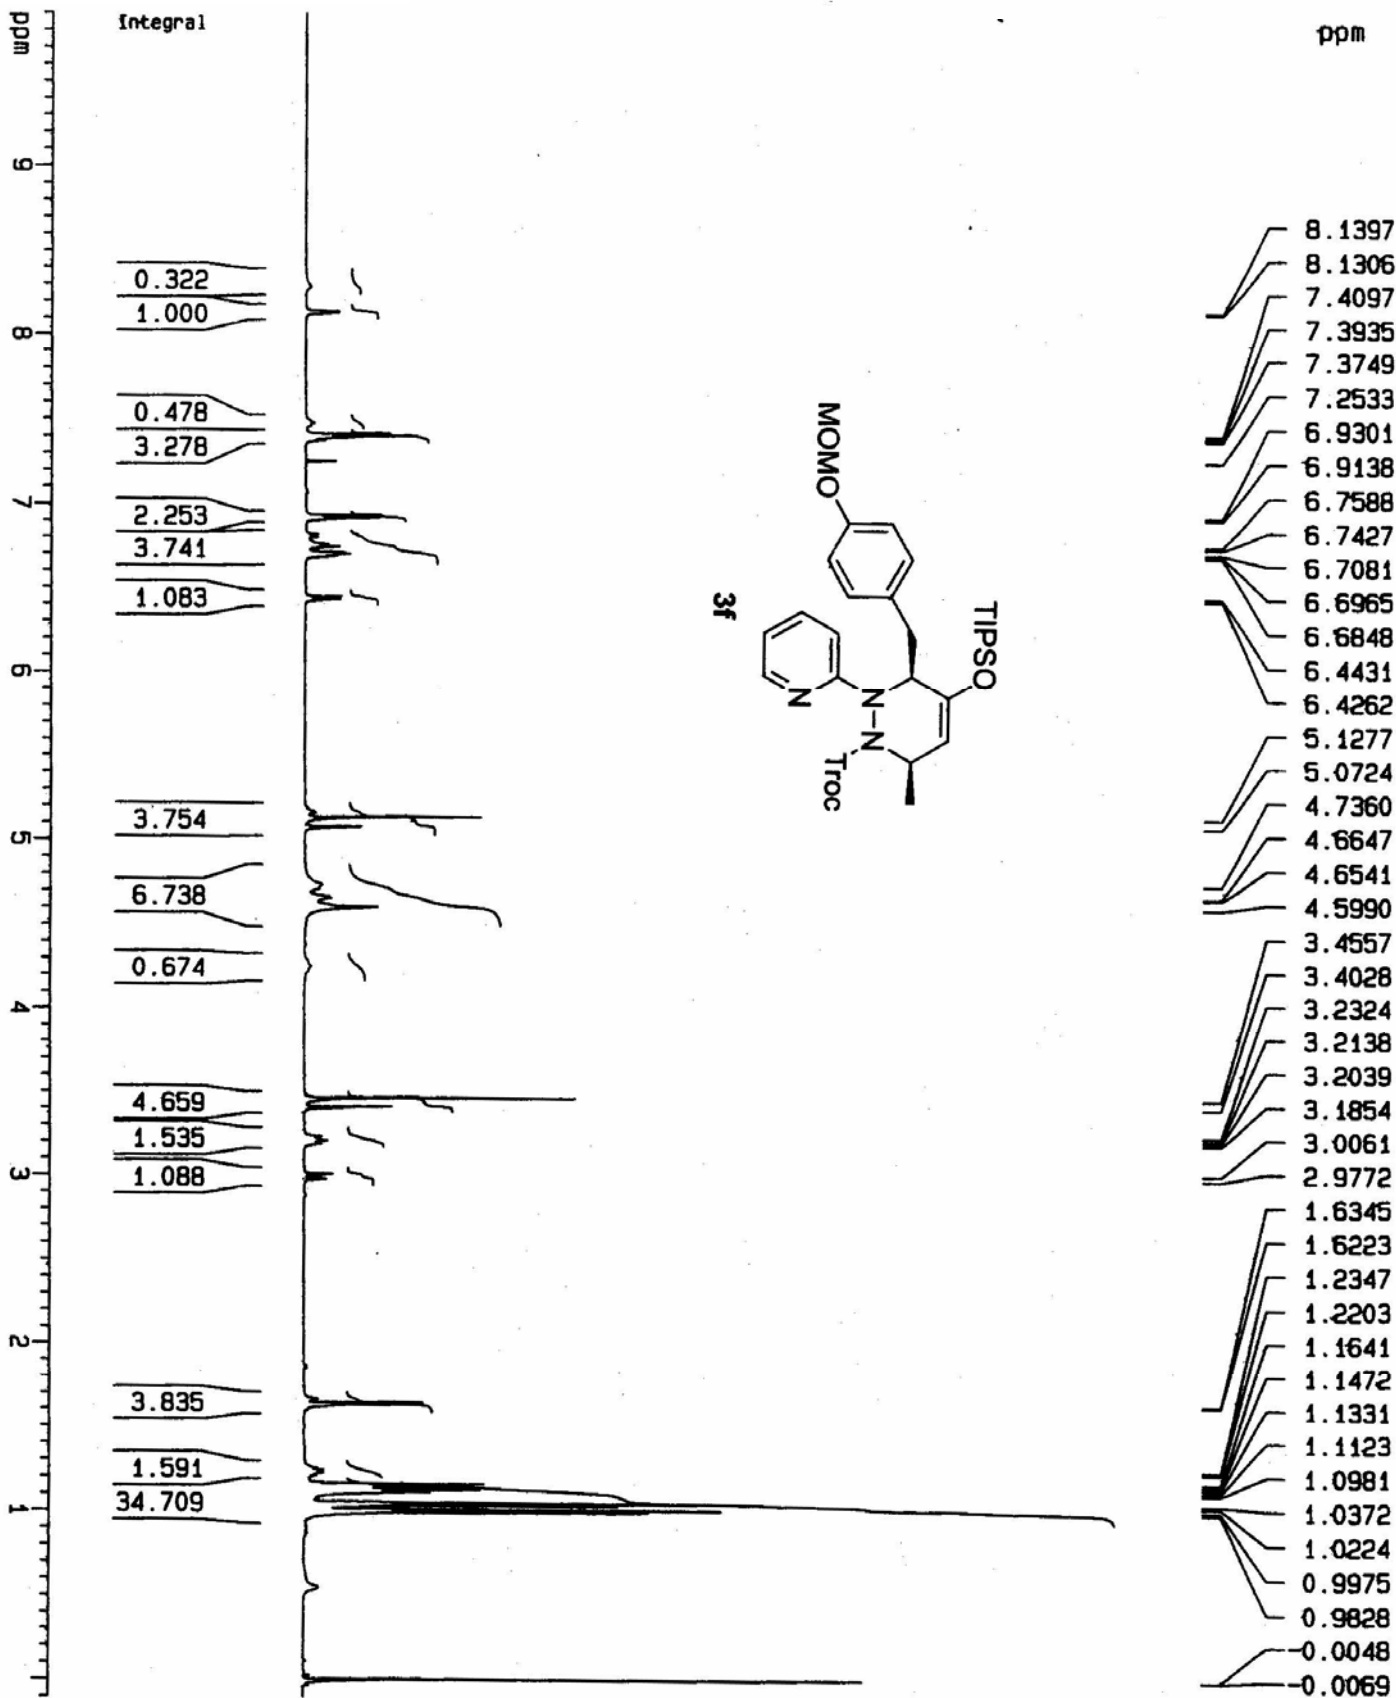



ppm 250  
200  
150  
100  
50  
0

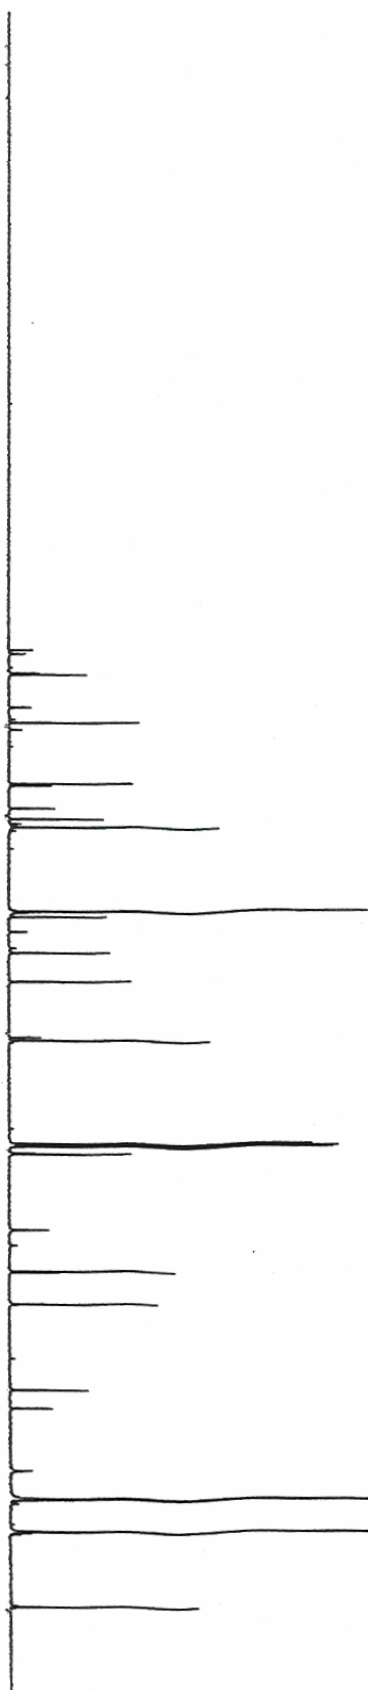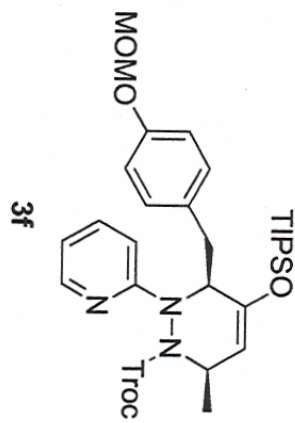

ppm

159.746  
155.928  
155.669  
155.615  
150.273  
147.719  
137.522  
137.187  
133.362  
131.585  
130.179  
116.224  
116.128  
115.225  
109.225  
104.450  
95.047  
94.545  
94.468  
77.273  
77.019  
76.764  
75.746  
75.486  
62.873  
55.871  
55.684  
50.373  
50.308  
36.021  
32.989  
18.037  
17.916  
17.879  
17.695  
12.568  
12.450  
-0.013

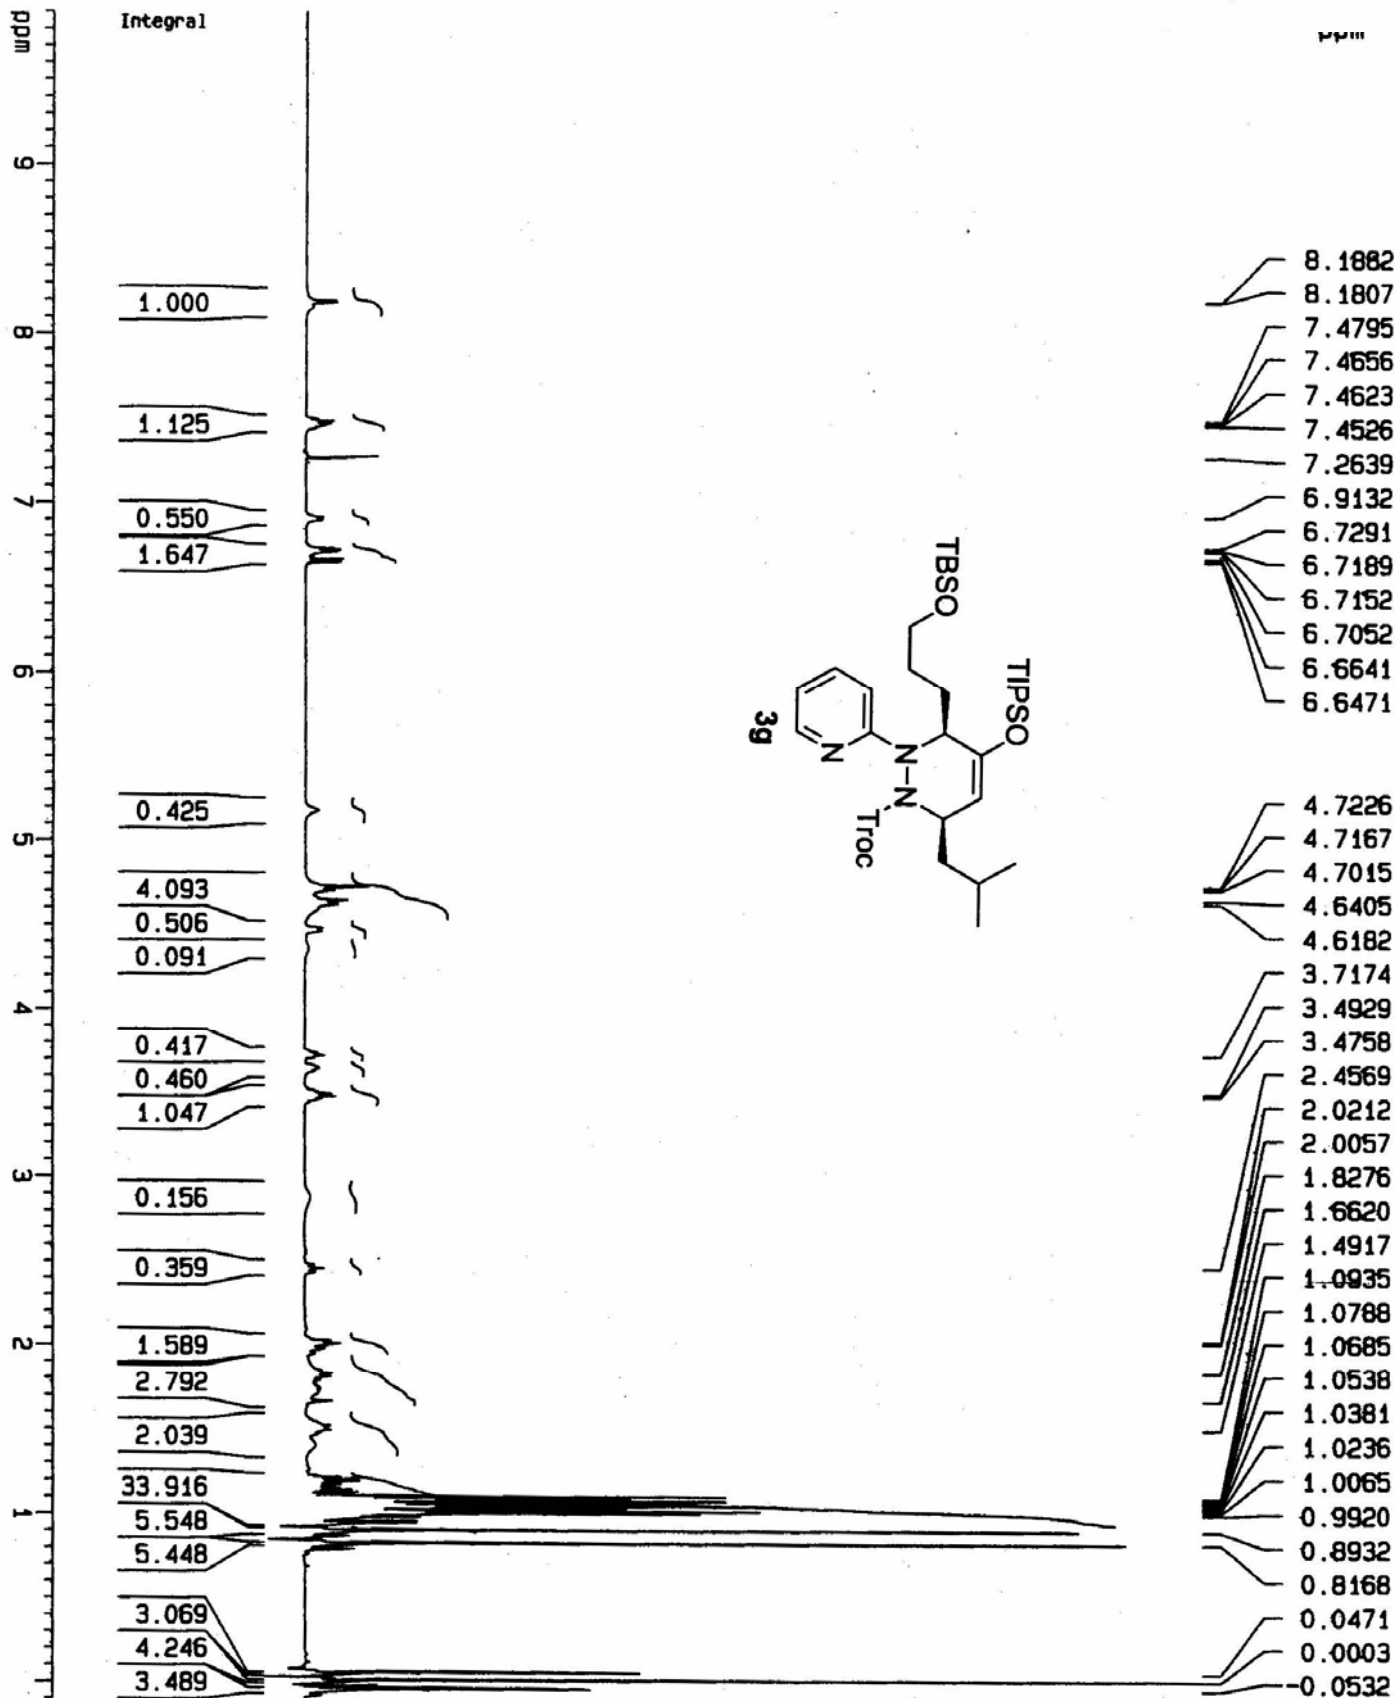

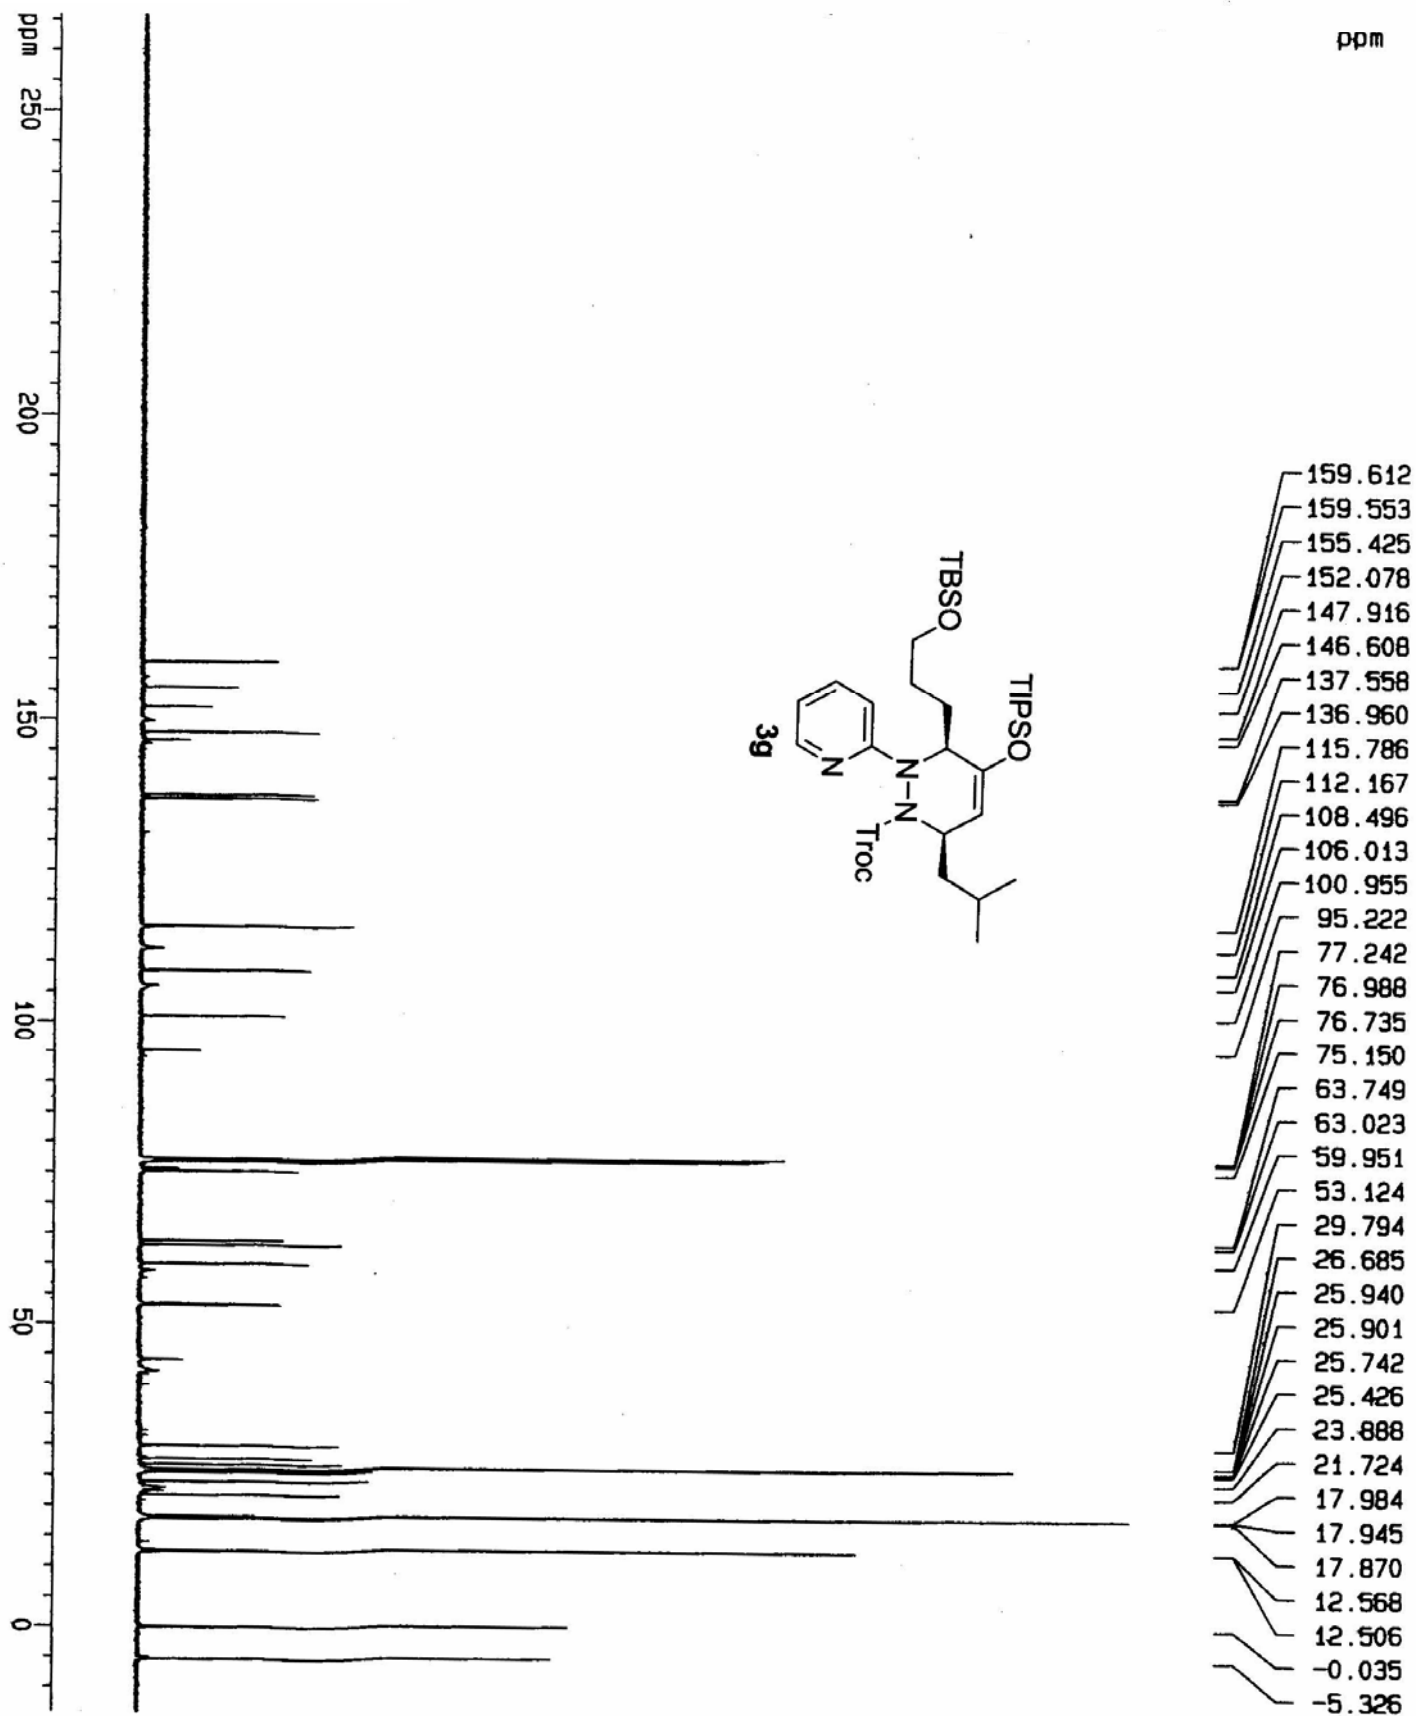

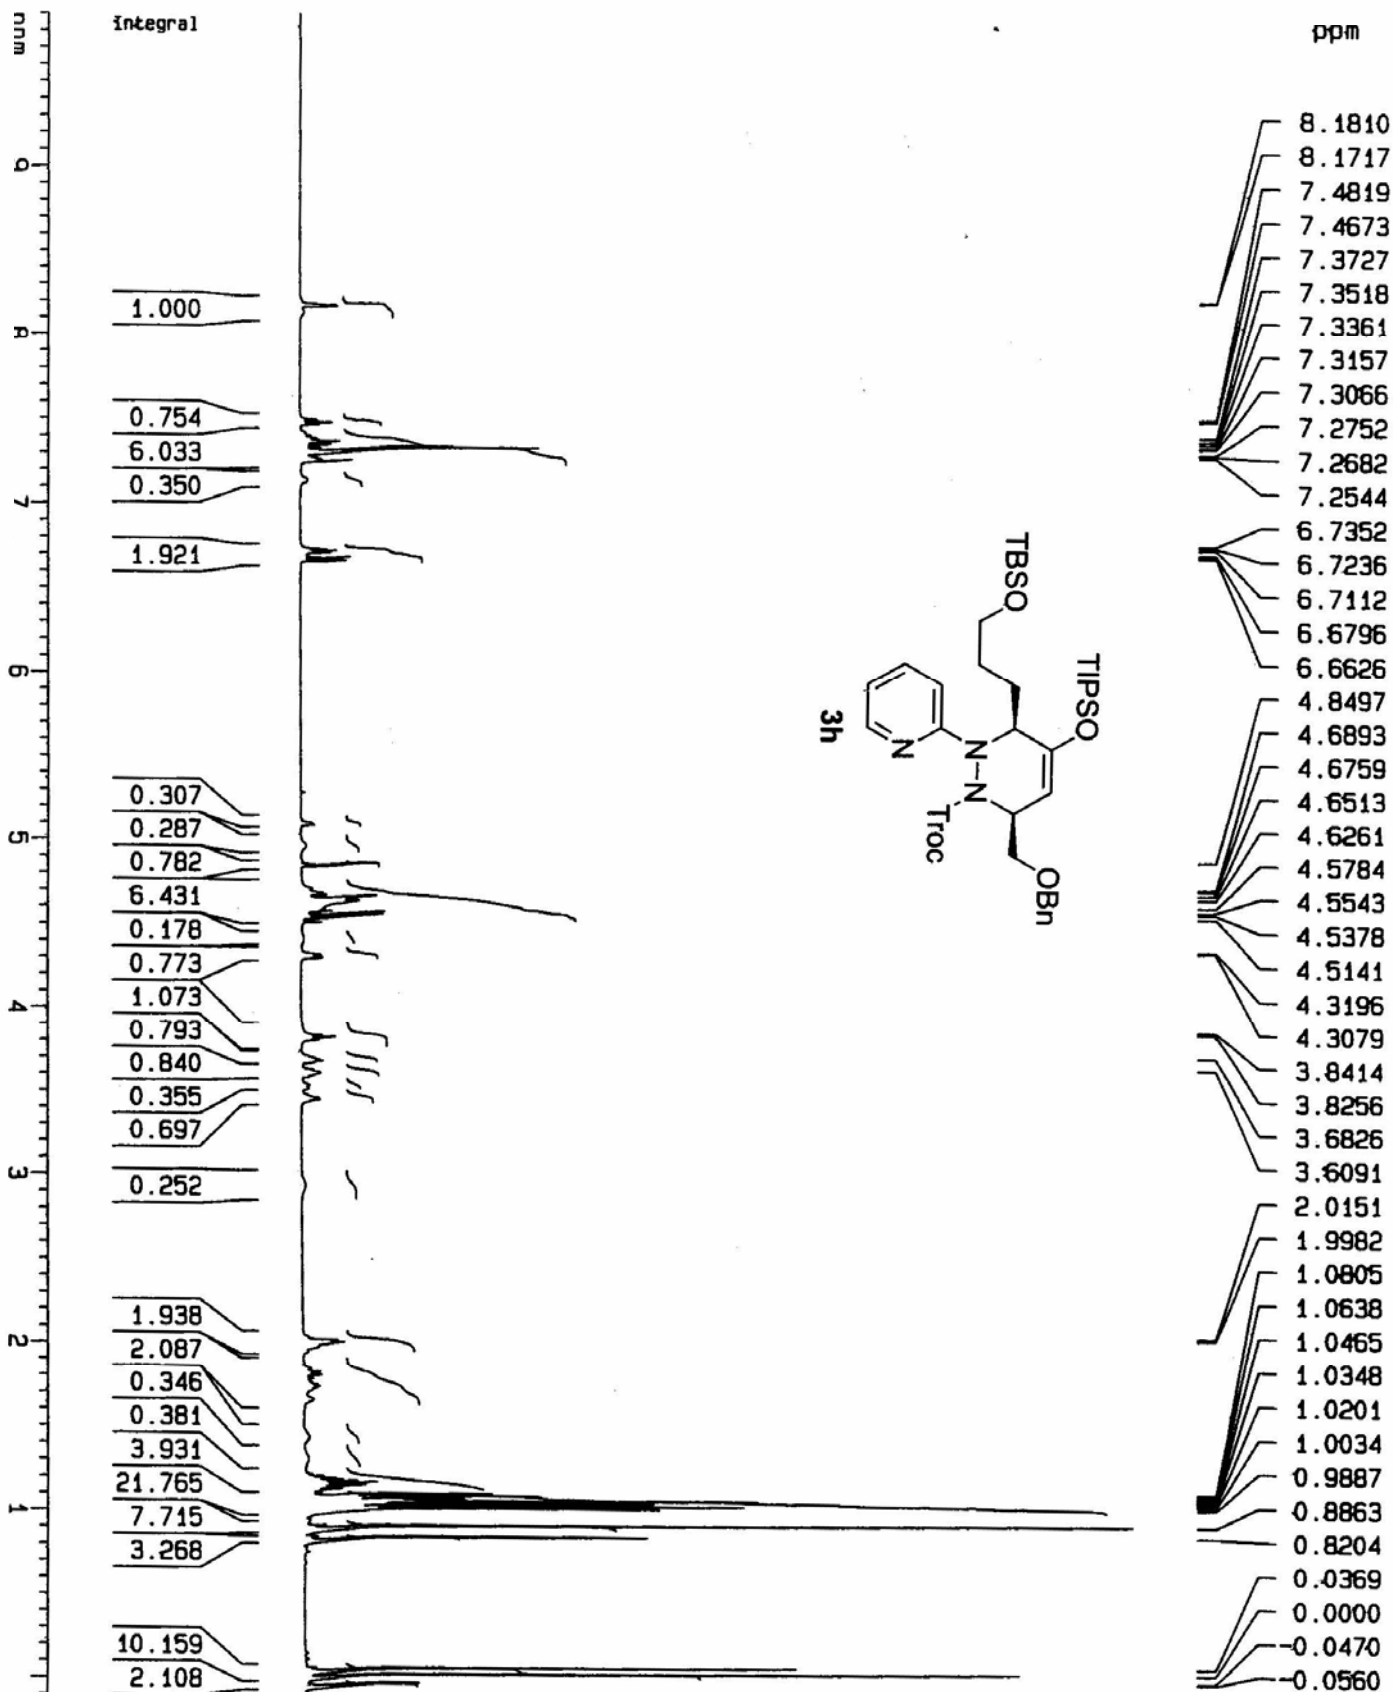

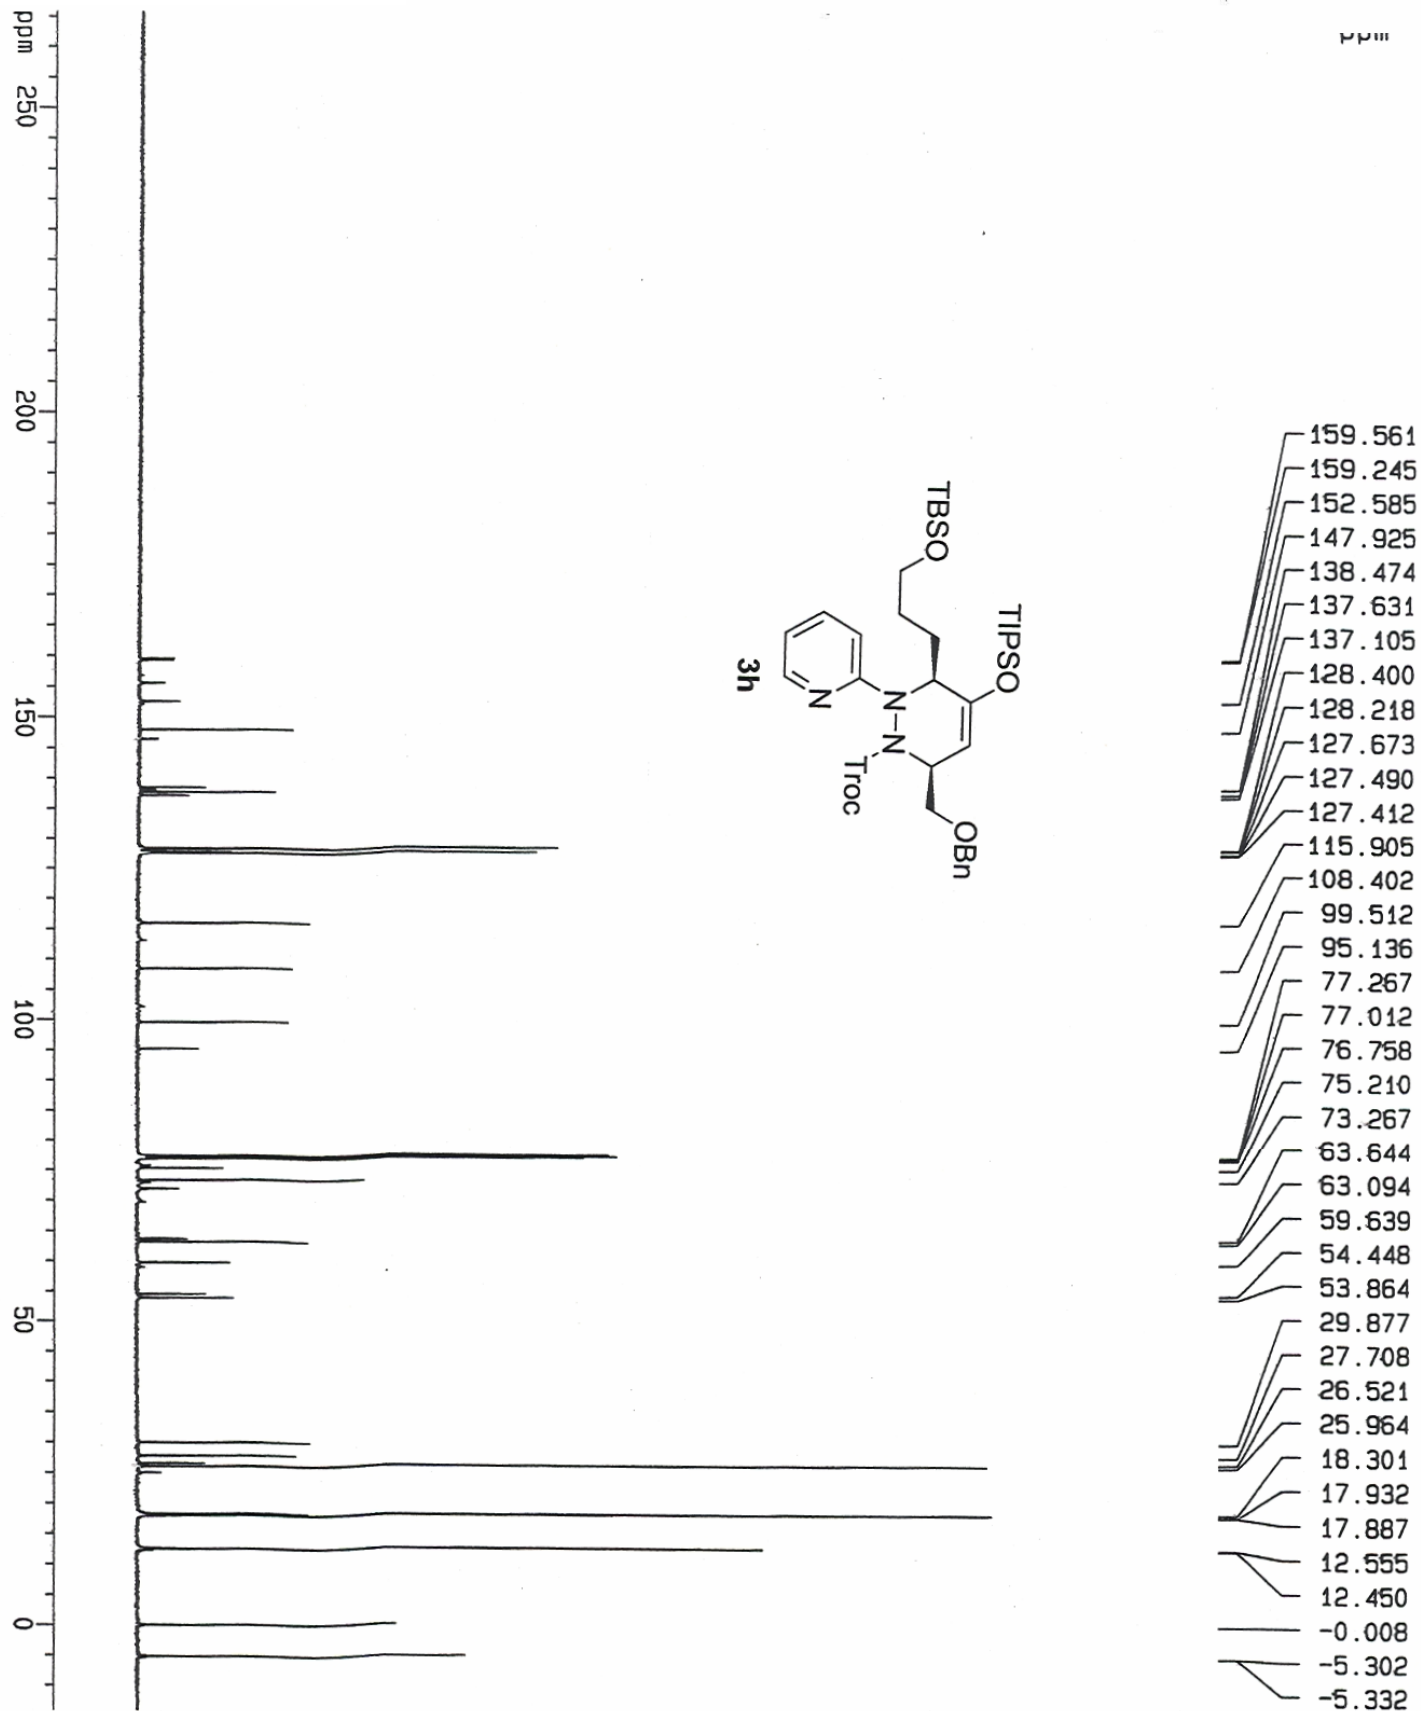

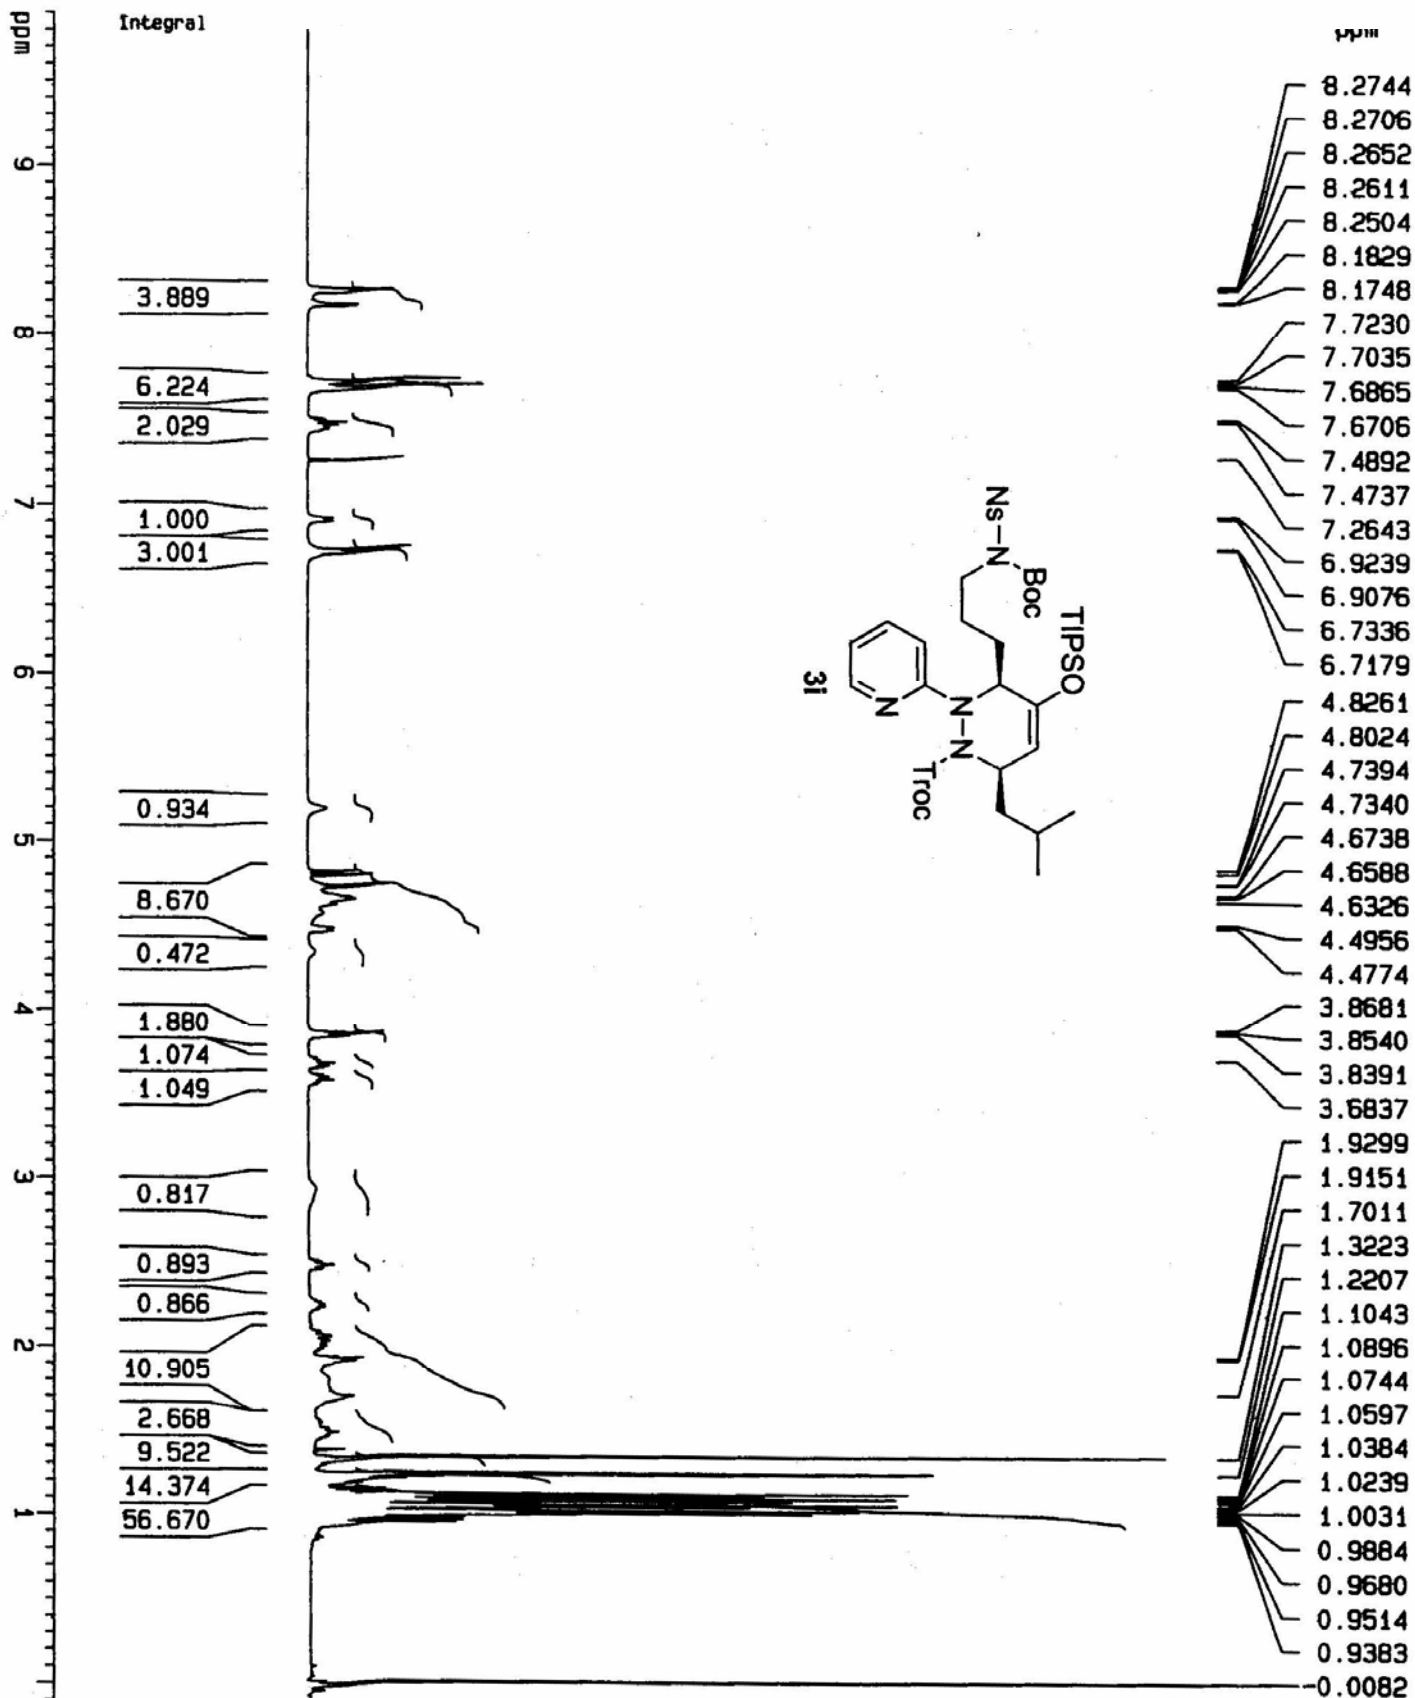

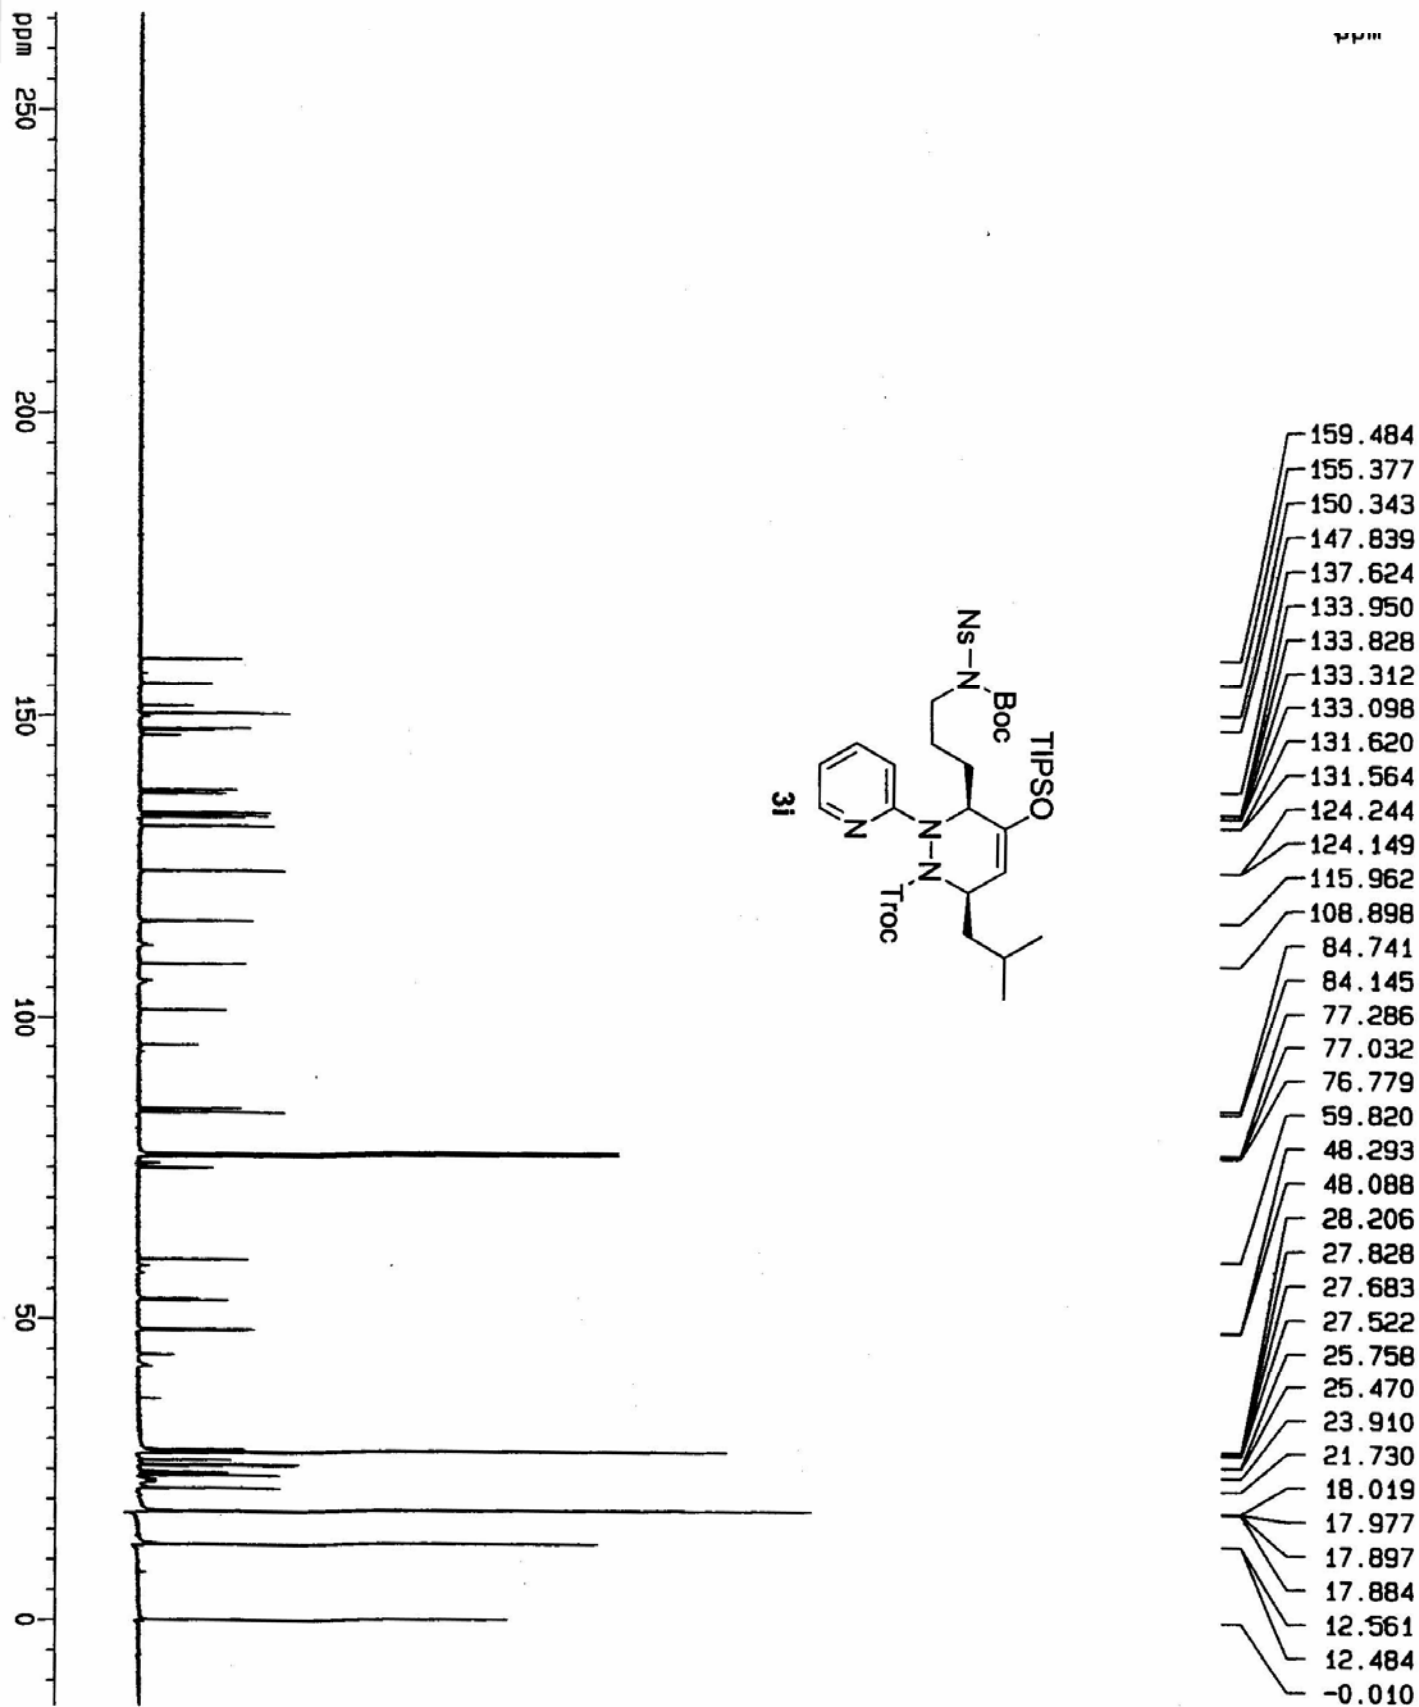

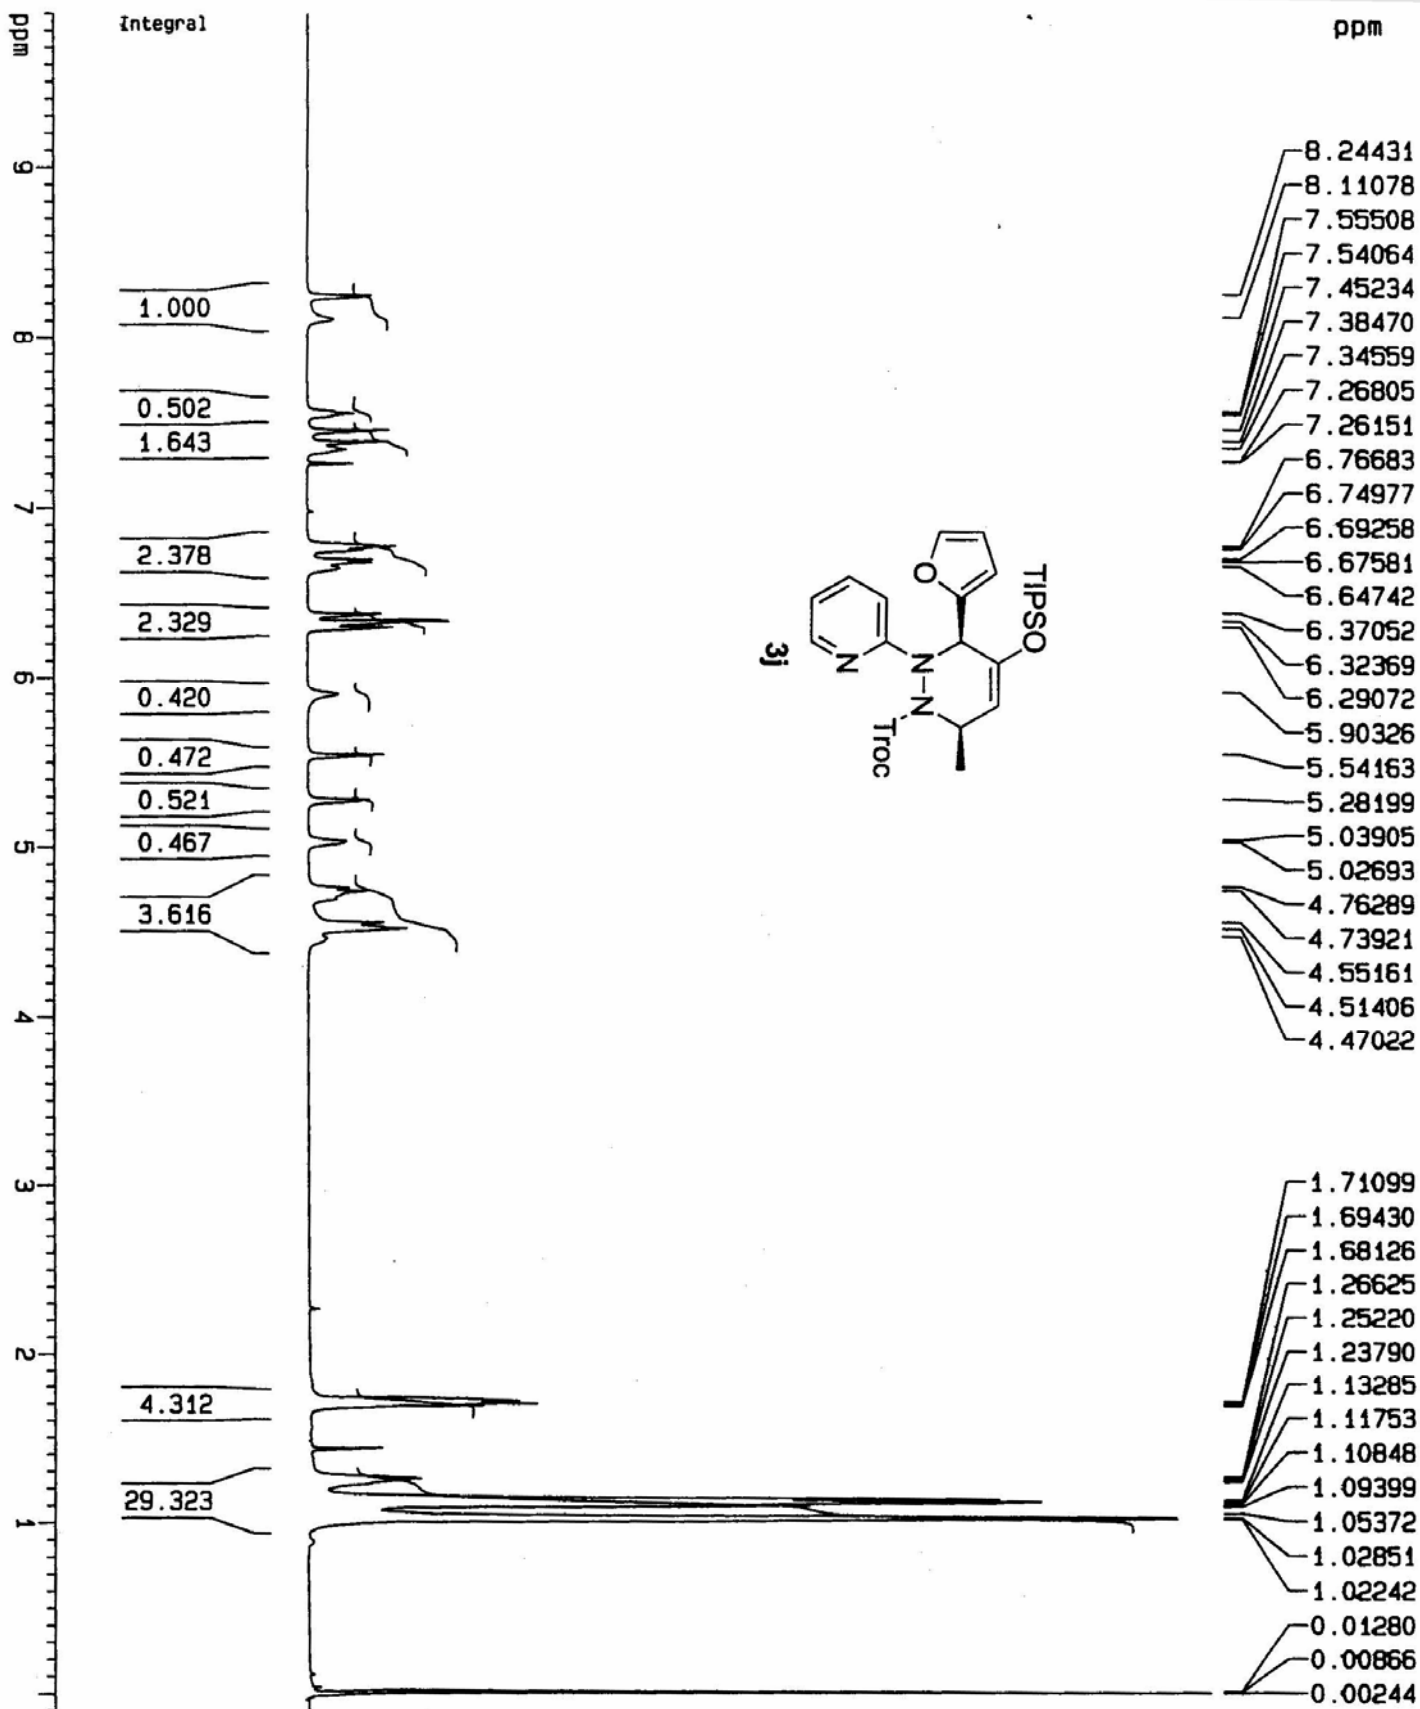



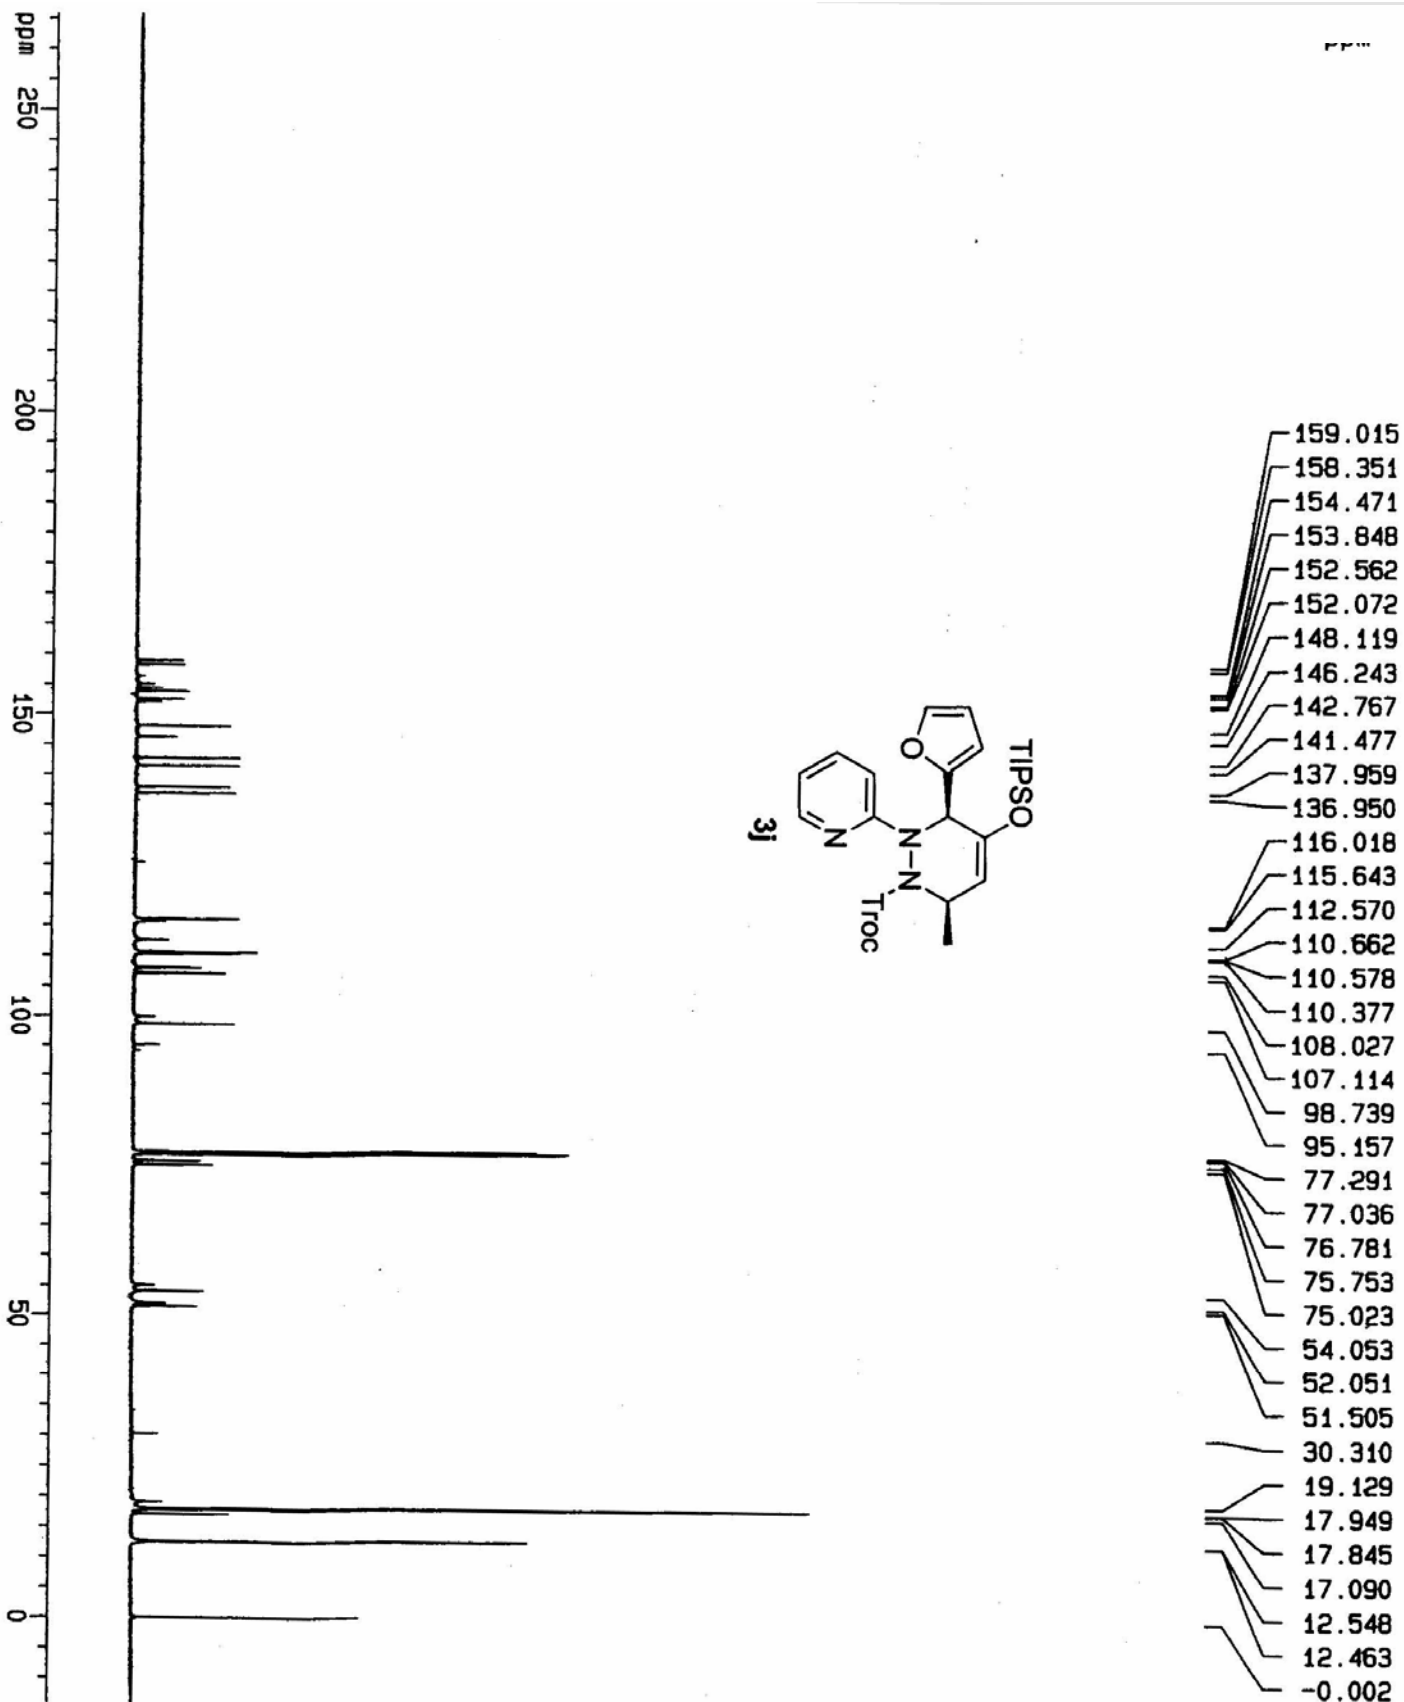

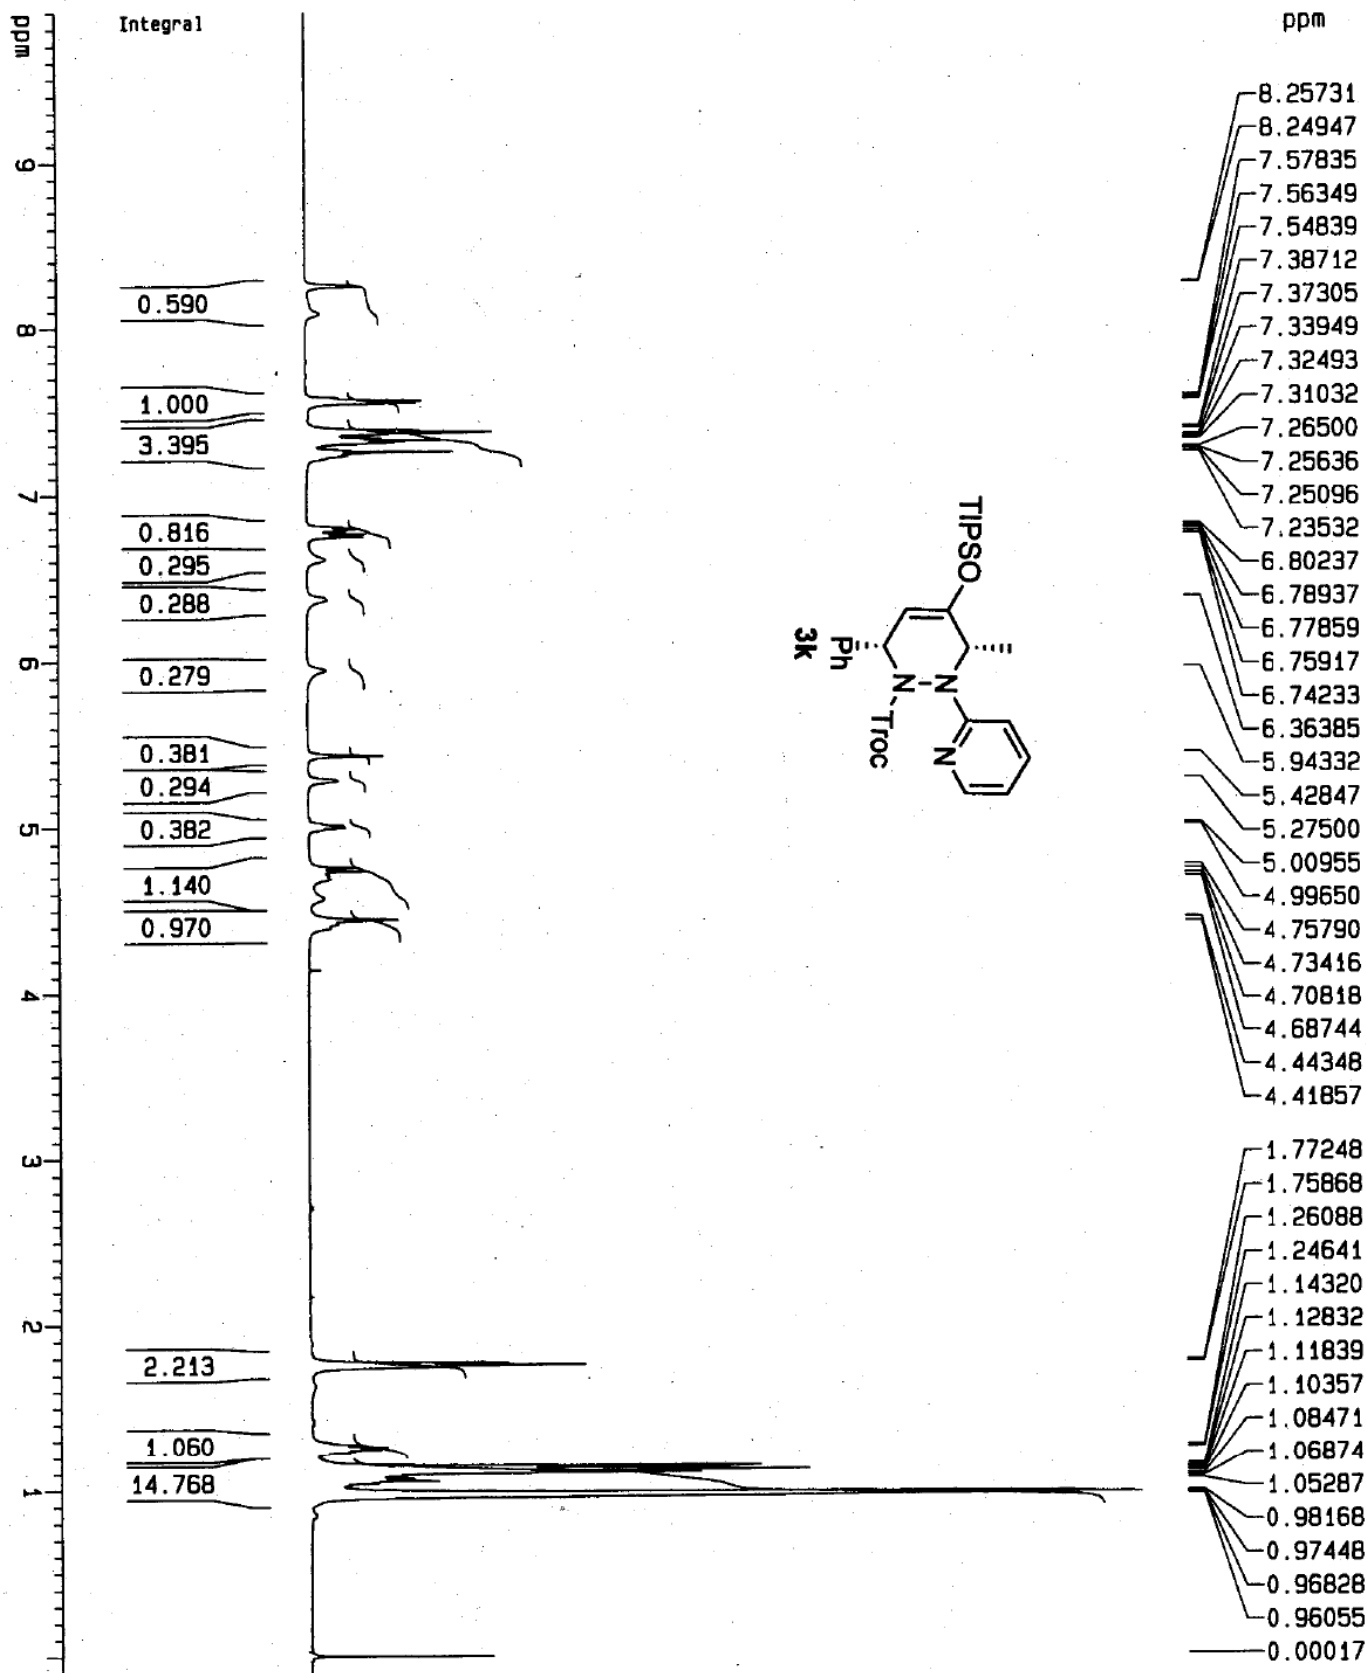

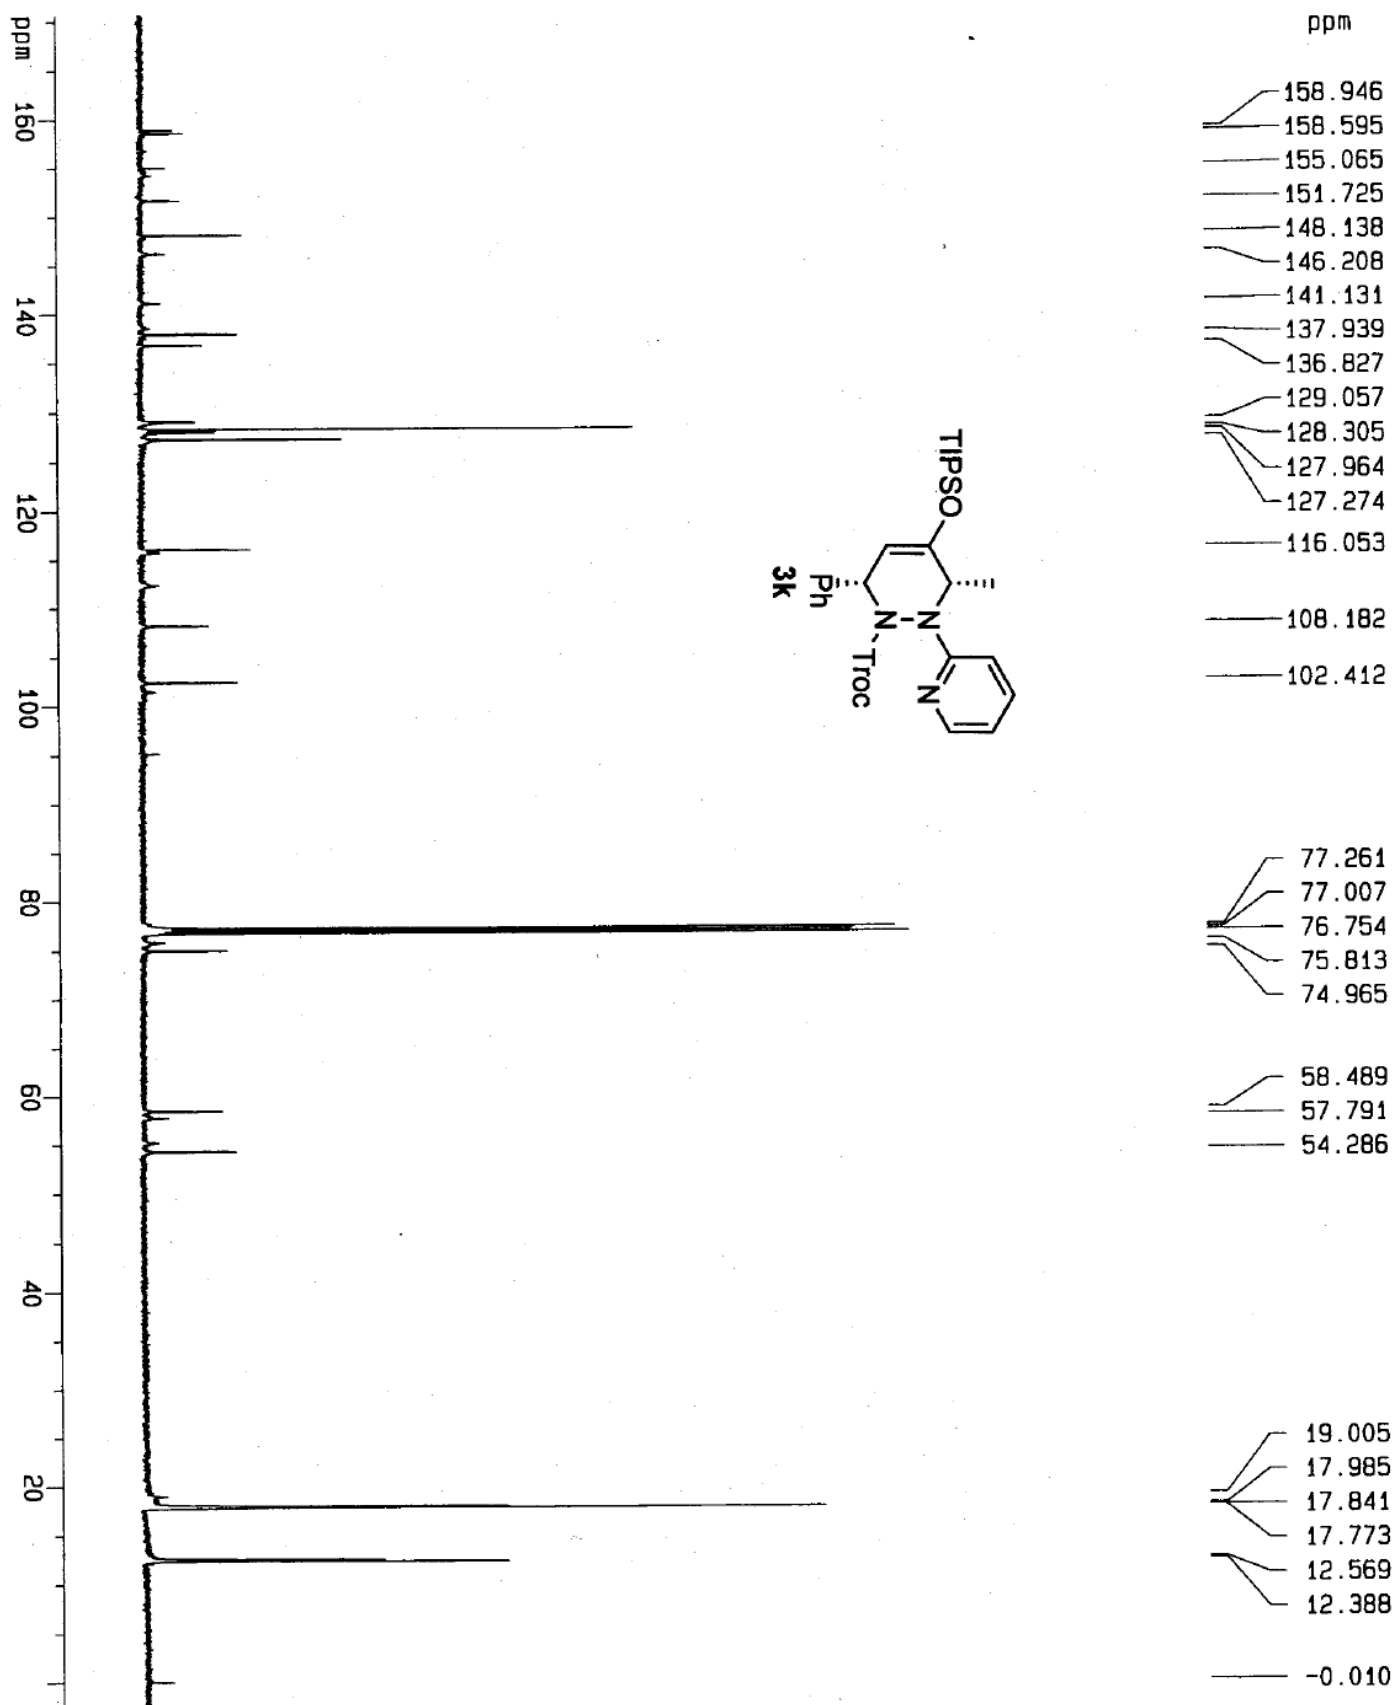

### **Crystallographic Experimental Section**

#### **Data Collection**

An irregular broken fragment (05 x 0.12 x 0.10 mm) was selected under a stereomicroscope while immersed in Fluorolube oil to avoid possible reaction with air. The crystal was removed from the oil using a tapered glass fiber that also served to hold the crystal for data collection. The crystal was mounted and centered on a Bruker SMART APEX system at 100 K. Rotation and still images showed the diffractions to be sharp. Frames separated in reciprocal space were obtained and provided an orientation matrix and initial cell parameters. Final cell parameters were obtained from the full data set.

A “full sphere” data set was obtained which samples approximately all of reciprocal space to a resolution of 0.75 Å using 0.3° steps in  $\omega$  using 10 second integration times for each frame. Data collection was made at 100 K. Integration of intensities and refinement of cell parameters were done using SAINT [1]. Absorption corrections were applied using SADABS [1] based on redundant diffractions.

#### **Structure solution and refinement**

The space group was determined as  $P2_12_12_1$  based on systematic absences and intensity statistics. Direct methods were used to locate most C atoms from the E-map. Repeated difference Fourier maps allowed recognition of all expected C, O and N atoms. Following anisotropic refinement of all non-H atoms, ideal H-atom positions were calculated for most H atoms. Only H19 was located from the difference Fourier map and its position and thermal parameters were refined. Final refinement was anisotropic for all non-H atoms, and isotropic-riding for H atoms except H19. No anomalous bond lengths or thermal parameters were noted. All ORTEP diagrams have been drawn with 50% probability ellipsoids.

**Equations of interest:**

$$R_{\text{int}} = \Sigma |F_o^2 - \langle F_o^2 \rangle| / \Sigma |F_o^2|$$

$$R1 = \Sigma ||F_o| - |F_c|| / \Sigma |F_o|$$

$$wR2 = [\Sigma [w (F_o^2 - F_c^2)^2] / \Sigma [w (F_o^2)^2]]^{1/2}$$

$$\text{GooF} = S = [\Sigma [w (F_o^2 - F_c^2)^2] / (n-p)]^{1/2}$$

$$\text{where: } w = q / \sigma^2 (F_o^2) + (aP)^2 + bP;$$

n = number of independent reflections;

q, a, b, P as defined in [1]

p = number of parameters refined.

**References**

[1] All software and sources of scattering factors are contained in the SHELXTL (version 5.1) program library (G. Sheldrick, Bruker Analytical X-ray Systems, Madison, WI).

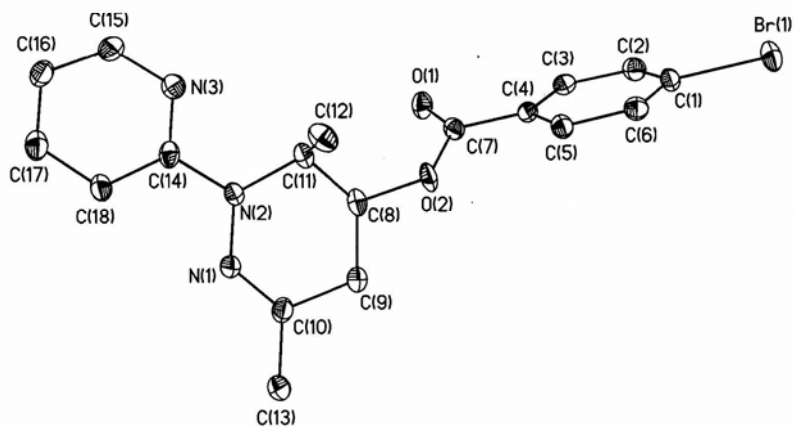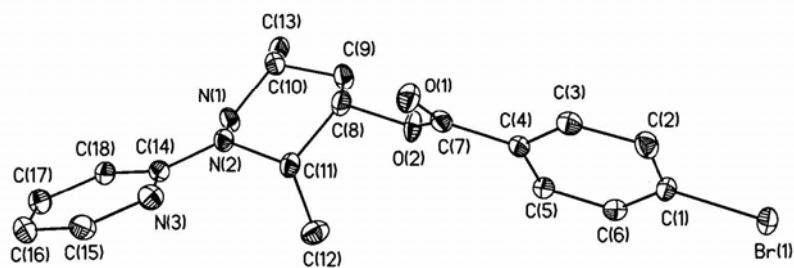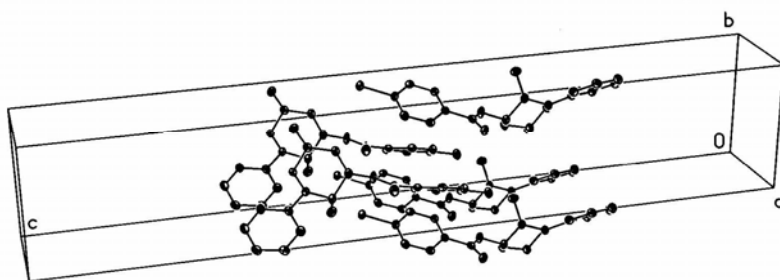

Table 1. Crystal and structure refinement for Kawa01.

|                                          |                                                                                                                                                                                                          |                       |
|------------------------------------------|----------------------------------------------------------------------------------------------------------------------------------------------------------------------------------------------------------|-----------------------|
| Identification Code                      | Kawa01                                                                                                                                                                                                   |                       |
| Empirical formula                        | $C_{18}H_{20}BrN_3O_2$                                                                                                                                                                                   |                       |
| Formula weight                           | 390.28                                                                                                                                                                                                   |                       |
| Temperature                              | 100 K                                                                                                                                                                                                    |                       |
| Wavelength                               | 0.71073 Å                                                                                                                                                                                                |                       |
| Crystal system                           | Orthorhombic                                                                                                                                                                                             |                       |
| Space Group                              | P2 <sub>1</sub> 2 <sub>1</sub> 2 <sub>1</sub>                                                                                                                                                            |                       |
| Unit cell dimensions                     | $a = 5.5911(11)$ Å                                                                                                                                                                                       | $\alpha = 90.0^\circ$ |
|                                          | $b = 7.3687(15)$ Å                                                                                                                                                                                       | $\beta = 90.0^\circ$  |
|                                          | $c = 41.520(8)$ Å                                                                                                                                                                                        | $\gamma = 90.0^\circ$ |
| Volume                                   | 1710.6(6) Å <sup>3</sup>                                                                                                                                                                                 |                       |
| Z                                        | 4                                                                                                                                                                                                        |                       |
| Density (calculated)                     | 1.515 Mg/m <sup>3</sup>                                                                                                                                                                                  |                       |
| Absorption coefficient                   | 2.419 mm <sup>-1</sup>                                                                                                                                                                                   |                       |
| F(000)                                   | 800                                                                                                                                                                                                      |                       |
| Crystal size, color, habit               | 0.50 x 0.12 x 0.10mm, clear, rod                                                                                                                                                                         |                       |
| Theta range for data collection          | 1.96 – 28.30 °                                                                                                                                                                                           |                       |
| Index ranges                             | -7 ≤ h ≤ 7, 9 ≤ k ≤ 9, -55 ≤ l ≤ 55                                                                                                                                                                      |                       |
| Reflections collected                    | 20,194                                                                                                                                                                                                   |                       |
| Independent reflections                  | 4,172 (R <sub>int</sub> = 0.0440)                                                                                                                                                                        |                       |
| Reflections with I > 4σ(F <sub>o</sub> ) | 3,820                                                                                                                                                                                                    |                       |
| Flack parameter                          | 0.015(8)                                                                                                                                                                                                 |                       |
| Absorption correction                    | SADABS based on redundant diffractions                                                                                                                                                                   |                       |
| Max. and min. transmission               | 1.0, 0.568                                                                                                                                                                                               |                       |
| Refinement method                        | Full-matrix least squares on F <sup>2</sup>                                                                                                                                                              |                       |
| Weighting scheme                         | w = q [σ <sup>2</sup> (F <sub>o</sub> <sup>2</sup> ) + (aP) <sup>2</sup> + bP] <sup>-1</sup> where:<br>P = (F <sub>o</sub> <sup>2</sup> + 2F <sub>c</sub> <sup>2</sup> )/3, a = 0.0402, b = 0.454, q = 1 |                       |
| Data / restraints / parameters           | 4172 / 0 / 219                                                                                                                                                                                           |                       |
| Goodness-of-fit on F <sup>2</sup>        | 1.068                                                                                                                                                                                                    |                       |
| Final R indices [I > 2 sigma(I)]         | R1 = 0.0323, wR2 = 0.0711                                                                                                                                                                                |                       |
| R indices (all data)                     | R1 = 0.0372, wR2 = 0.0722                                                                                                                                                                                |                       |
| Largest diff. peak and hole              | 0.685, -0.359 eÅ <sup>-3</sup>                                                                                                                                                                           |                       |

Table 2. Atomic coordinates [ $\times 10^4$ ] and equivalent isotropic displacement parameters [ $\text{\AA}^2 \times 10^3$ ] for Kawa01. U(eq) is defined as one third of the trace of the orthogonalized  $U_{ij}$  tensor.

|       | x        | y       | z       | U(eq) | SOF |
|-------|----------|---------|---------|-------|-----|
| Br(1) | 1731(1)  | 6355(1) | -746(1) | 26(1) |     |
| C(1)  | 798(5)   | 5572(3) | -330(1) | 20(1) |     |
| C(2)  | -1371(5) | 4725(3) | -286(1) | 21(1) |     |
| C(3)  | -2040(5) | 4211(3) | 23(1)   | 19(1) |     |
| C(4)  | -525(5)  | 4514(3) | 281(1)  | 17(1) |     |
| C(5)  | 1702(5)  | 5332(3) | 231(1)  | 18(1) |     |
| C(6)  | 2342(4)  | 5896(3) | -74(1)  | 19(1) |     |
| C(7)  | -1306(4) | 3898(3) | 606(1)  | 18(1) |     |
| C(8)  | 178(5)   | 3082(3) | 1130(1) | 21(1) |     |
| C(9)  | 2405(5)  | 2019(4) | 1213(1) | 23(1) |     |
| C(10) | 2457(4)  | 1517(4) | 1568(1) | 22(1) |     |
| C(11) | -270(5)  | 4686(3) | 1355(1) | 19(1) |     |
| C(12) | 1435(5)  | 6278(4) | 1310(1) | 26(1) |     |
| C(13) | 4830(5)  | 694(4)  | 1663(1) | 24(1) |     |
| C(14) | -1371(5) | 4820(3) | 1933(1) | 19(1) |     |
| C(15) | -4619(5) | 6499(4) | 2089(1) | 23(1) |     |
| C(16) | -3979(4) | 6463(4) | 2407(1) | 25(1) |     |
| C(17) | -1900(5) | 5548(3) | 2488(1) | 24(1) |     |
| C(18) | -567(5)  | 4714(3) | 2253(1) | 20(1) |     |
| N(1)  | 1997(4)  | 3087(3) | 1773(1) | 20(1) |     |
| N(2)  | -179(4)  | 3946(3) | 1684(1) | 19(1) |     |
| N(3)  | -3378(4) | 5704(3) | 1852(1) | 21(1) |     |
| O(1)  | -3338(3) | 3563(3) | 680(1)  | 23(1) |     |
| O(2)  | 578(3)   | 3737(3) | 804(1)  | 22(1) |     |



Table 3. Bond lengths [Å] and angles [°] for Kawa01.

|                  |            |                   |            |
|------------------|------------|-------------------|------------|
| Br(1)-C(1)       | 1.893(2)   | C(9)-C(10)        | 1.522(3)   |
| C(1)-C(2)        | 1.376(4)   | C(10)-N(1)        | 1.459(3)   |
| C(1)-C(6)        | 1.389(3)   | C(10)-C(13)       | 1.511(4)   |
| C(2)-C(3)        | 1.388(3)   | C(11)-N(2)        | 1.470(3)   |
| C(3)-C(4)        | 1.384(3)   | C(11)-C(12)       | 1.523(3)   |
| C(4)-C(5)        | 1.398(4)   | C(14)-N(3)        | 1.340(3)   |
| C(4)-C(7)        | 1.489(3)   | C(14)-N(2)        | 1.389(3)   |
| C(5)-C(6)        | 1.383(3)   | C(14)-C(18)       | 1.405(3)   |
| C(7)-O(1)        | 1.203(3)   | C(15)-N(3)        | 1.340(3)   |
| C(7)-O(2)        | 1.342(3)   | C(15)-C(16)       | 1.369(4)   |
| C(8)-O(2)        | 1.454(3)   | C(16)-C(17)       | 1.385(4)   |
| C(8)-C(9)        | 1.511(4)   | C(17)-C(18)       | 1.372(4)   |
| C(8)-C(11)       | 1.528(3)   | N(1)-N(2)         | 1.421(3)   |
| C(2)-C(1)-C(6)   | 121.6(2)   | N(1)-C(10)-C(9)   | 111.7(2)   |
| C(2)-C(1)-Br(1)  | 120.16(19) | C(13)-C(10)-C(9)  | 111.5(2)   |
| C(6)-C(1)-Br(1)  | 118.26(19) | N(2)-C(11)-C(12)  | 112.2(2)   |
| C(1)-C(2)-C(3)   | 119.0(2)   | N(2)-C(11)-C(8)   | 106.02(19) |
| C(4)-C(3)-C(2)   | 120.4(2)   | C(12)-C(11)-C(8)  | 114.7(2)   |
| C(3)-C(4)-C(5)   | 120.1(2)   | N(3)-C(14)-N(2)   | 116.1(2)   |
| C(3)-C(4)-C(7)   | 118.2(2)   | N(3)-C(14)-C(18)  | 122.2(2)   |
| C(5)-C(4)-C(7)   | 121.7(2)   | N(2)-C(14)-C(18)  | 121.7(2)   |
| C(6)-C(5)-C(4)   | 119.6(2)   | N(3)-C(15)-C(16)  | 124.5(3)   |
| C(5)-C(6)-C(1)   | 119.3(2)   | C(15)-C(16)-C(17) | 117.4(2)   |
| O(1)-C(7)-O(2)   | 124.4(2)   | C(18)-C(17)-C(16) | 120.2(2)   |
| O(1)-C(7)-C(4)   | 124.9(2)   | C(17)-C(18)-C(14) | 118.2(3)   |
| O(2)-C(7)-C(4)   | 110.6(2)   | N(2)-N(1)-C(10)   | 110.57(19) |
| O(2)-C(8)-C(9)   | 104.9(2)   | C(14)-N(2)-N(1)   | 114.97(19) |
| O(2)-C(8)-C(11)  | 109.8(2)   | C(14)-N(2)-C(11)  | 120.2(2)   |
| C(9)-C(8)-C(11)  | 113.3(2)   | N(1)-N(2)-C(11)   | 115.98(19) |
| C(8)-C(9)-C(10)  | 111.3(2)   | C(14)-N(3)-C(15)  | 117.5(2)   |
| N(1)-C(10)-C(13) | 108.7(2)   | C(7)-O(2)-C(8)    | 118.62(19) |

Table 4. Anisotropic displacement parameters [ $\text{\AA}^2 \times 10^3$ ] for Kawa01.  
 The anisotropic displacement factor exponent takes the form:  
 $-2\pi^2 [h^2 a^{*2} U_{11} + \dots + 2hka^* b^* U_{12}]$

|        | $U_{11}$ | $U_{22}$ | $U_{33}$ | $U_{23}$ | $U_{13}$ | $U_{12}$ |
|--------|----------|----------|----------|----------|----------|----------|
| Br (1) | 37 (1)   | 25 (1)   | 14 (1)   | 2 (1)    | 2 (1)    | -6 (1)   |
| C (1)  | 27 (1)   | 19 (1)   | 14 (1)   | 2 (1)    | 3 (1)    | 2 (1)    |
| C (2)  | 24 (1)   | 22 (1)   | 17 (1)   | -2 (1)   | -4 (1)   | 0 (1)    |
| C (3)  | 18 (1)   | 17 (1)   | 21 (1)   | -1 (1)   | 1 (1)    | 1 (1)    |
| C (4)  | 22 (1)   | 14 (1)   | 15 (1)   | -1 (1)   | 2 (1)    | 2 (1)    |
| C (5)  | 23 (1)   | 16 (1)   | 16 (1)   | 0 (1)    | 0 (1)    | 0 (1)    |
| C (6)  | 22 (1)   | 16 (1)   | 20 (1)   | 0 (1)    | 1 (1)    | 0 (1)    |
| C (7)  | 24 (1)   | 16 (1)   | 14 (1)   | -2 (1)   | -3 (1)   | 1 (1)    |
| C (8)  | 25 (1)   | 24 (1)   | 14 (1)   | 2 (1)    | 1 (1)    | -3 (1)   |
| C (9)  | 27 (1)   | 27 (1)   | 15 (1)   | -2 (1)   | 0 (1)    | 4 (1)    |
| C (10) | 27 (1)   | 21 (1)   | 17 (1)   | -2 (1)   | 2 (1)    | 2 (1)    |
| C (11) | 21 (1)   | 22 (1)   | 14 (1)   | 3 (1)    | -1 (1)   | 0 (1)    |
| C (12) | 30 (1)   | 22 (1)   | 27 (1)   | 5 (1)    | -6 (1)   | -2 (1)   |
| C (13) | 28 (1)   | 24 (1)   | 19 (1)   | 5 (1)    | 3 (1)    | 3 (1)    |
| C (14) | 23 (1)   | 18 (1)   | 16 (1)   | -2 (1)   | 1 (1)    | -4 (1)   |
| C (15) | 23 (1)   | 20 (1)   | 25 (1)   | -2 (1)   | 2 (1)    | 0 (1)    |
| C (16) | 30 (1)   | 22 (1)   | 21 (1)   | -3 (1)   | 5 (1)    | 3 (1)    |
| C (17) | 31 (1)   | 23 (1)   | 17 (1)   | -2 (1)   | 1 (1)    | -3 (1)   |
| C (18) | 27 (1)   | 20 (1)   | 15 (1)   | 1 (1)    | 1 (1)    | -2 (1)   |
| N (1)  | 24 (1)   | 21 (1)   | 16 (1)   | -1 (1)   | 0 (1)    | 3 (1)    |
| N (2)  | 22 (1)   | 21 (1)   | 13 (1)   | 1 (1)    | -1 (1)   | 1 (1)    |
| N (3)  | 21 (1)   | 21 (1)   | 21 (1)   | -1 (1)   | -2 (1)   | -2 (1)   |
| O (1)  | 21 (1)   | 30 (1)   | 19 (1)   | 2 (1)    | 3 (1)    | -4 (1)   |
| O (2)  | 21 (1)   | 36 (1)   | 10 (1)   | 4 (1)    | -2 (1)   | -3 (1)   |

Table 5. Hydrogen coordinates [ $\times 10^4$ ] and isotropic displacement parameters [ $\text{\AA}^2 \times 10^3$ ] for Kawa01.

|        | x        | y        | z       | U(eq) |
|--------|----------|----------|---------|-------|
| H(2)   | -2373    | 4501     | -460    | 25    |
| H(3)   | -3516    | 3660     | 56      | 22    |
| H(5)   | 2746     | 5495     | 403     | 22    |
| H(6)   | 3791     | 6486     | -108    | 23    |
| H(8)   | -1211    | 2272     | 1132    | 25    |
| H(9A)  | 3806     | 2738     | 1161    | 27    |
| H(9B)  | 2458     | 922      | 1084    | 27    |
| H(10)  | 1201     | 616      | 1608    | 26    |
| H(11)  | -1899    | 5125     | 1316    | 23    |
| H(12A) | 982      | 7248     | 1452    | 39    |
| H(12B) | 1362     | 6691     | 1091    | 39    |
| H(12C) | 3037     | 5899     | 1359    | 39    |
| H(13A) | 6089     | 1545     | 1620    | 35    |
| H(13B) | 5096     | -394     | 1541    | 35    |
| H(13C) | 4811     | 408      | 1889    | 35    |
| H(15)  | -6011    | 7116     | 2034    | 27    |
| H(16)  | -4906    | 7032     | 2564    | 29    |
| H(17)  | -1404    | 5499     | 2701    | 28    |
| H(18)  | 831      | 4094     | 2304    | 24    |
| H(19)  | 3300(50) | 3850(40) | 1747(6) | 20(7) |

Table 6. Torsion angles [ $^{\circ}$ ] for Kawa01.

|                         |             |
|-------------------------|-------------|
| C(6)-C(1)-C(2)-C(3)     | 1.0(4)      |
| Br(1)-C(1)-C(2)-C(3)    | -178.21(19) |
| C(1)-C(2)-C(3)-C(4)     | -1.3(4)     |
| C(2)-C(3)-C(4)-C(5)     | -0.4(4)     |
| C(2)-C(3)-C(4)-C(7)     | -178.6(2)   |
| C(3)-C(4)-C(5)-C(6)     | 2.4(3)      |
| C(7)-C(4)-C(5)-C(6)     | -179.4(2)   |
| C(4)-C(5)-C(6)-C(1)     | -2.6(4)     |
| C(2)-C(1)-C(6)-C(5)     | 0.9(4)      |
| Br(1)-C(1)-C(6)-C(5)    | -179.80(18) |
| C(3)-C(4)-C(7)-O(1)     | -19.1(4)    |
| C(5)-C(4)-C(7)-O(1)     | 162.7(2)    |
| C(3)-C(4)-C(7)-O(2)     | 159.9(2)    |
| C(5)-C(4)-C(7)-O(2)     | -18.3(3)    |
| O(2)-C(8)-C(9)-C(10)    | 170.1(2)    |
| C(11)-C(8)-C(9)-C(10)   | 50.3(3)     |
| C(8)-C(9)-C(10)-N(1)    | -49.9(3)    |
| C(8)-C(9)-C(10)-C(13)   | -171.8(2)   |
| O(2)-C(8)-C(11)-N(2)    | -169.09(19) |
| C(9)-C(8)-C(11)-N(2)    | -52.1(3)    |
| O(2)-C(8)-C(11)-C(12)   | -44.7(3)    |
| C(9)-C(8)-C(11)-C(12)   | 72.3(3)     |
| N(3)-C(15)-C(16)-C(17)  | 0.3(4)      |
| C(15)-C(16)-C(17)-C(18) | -0.3(4)     |
| C(16)-C(17)-C(18)-C(14) | 0.1(4)      |
| N(3)-C(14)-C(18)-C(17)  | 0.0(4)      |
| N(2)-C(14)-C(18)-C(17)  | -177.2(2)   |
| C(13)-C(10)-N(1)-N(2)   | 177.72(19)  |
| C(9)-C(10)-N(1)-N(2)    | 54.2(3)     |
| N(3)-C(14)-N(2)-N(1)    | 177.4(2)    |
| C(18)-C(14)-N(2)-N(1)   | -5.2(3)     |
| N(3)-C(14)-N(2)-C(11)   | 31.3(3)     |
| C(18)-C(14)-N(2)-C(11)  | -151.3(2)   |
| C(10)-N(1)-N(2)-C(14)   | 150.5(2)    |
| C(10)-N(1)-N(2)-C(11)   | -62.0(3)    |
| C(12)-C(11)-N(2)-C(14)  | 78.8(3)     |
| C(8)-C(11)-N(2)-C(14)   | -155.3(2)   |
| C(12)-C(11)-N(2)-N(1)   | -67.0(3)    |
| C(8)-C(11)-N(2)-N(1)    | 59.0(3)     |
| N(2)-C(14)-N(3)-C(15)   | 177.4(2)    |
| C(18)-C(14)-N(3)-C(15)  | 0.0(4)      |
| C(16)-C(15)-N(3)-C(14)  | -0.2(4)     |
| O(1)-C(7)-O(2)-C(8)     | 1.3(4)      |
| C(4)-C(7)-O(2)-C(8)     | -177.7(2)   |
| C(9)-C(8)-O(2)-C(7)     | 146.7(2)    |
| C(11)-C(8)-O(2)-C(7)    | -91.1(3)    |
